# Supplementary material
Source: publisher figshare collection journal article supplement (https://plos.figshare.com/articles/dataset/_/1263184)
Supplement: Supplementary file 1 [file 1 › Dataset_S1.txt]

>CaNAC01
ATGGATAATAACAGTATTAACAATGTGAACCTTCCACCCGGATTTCGTTTTTATCCAACA
GATGAAGAGCTTGTACTTCATTTCCTTCACAGAAAAAAAACACCACTCTTACCTTTCCAC
CCTGATGTCATTCCTGATCTTCACCTTTACTCATATGATCCATGGCAACTTCATGGTAGA
GCTTTGGCTGAGGGAAACAAATGGTATTACTATAGCAGAAGGAGTACACAAAATAGAGTC
ACTTGCAATGGTTATTGGAAGCCAACAGGAATAGAAGAGCCAGTGTTTTGTAGCACCAAA
AACAACAGAATTGGCATCAAGAAACATTTTGTCTTTCATATGGGAGAATCAGATTCTGTT
GGTATCAAAACCAATTGGATCATGCATGAATTTCGTCTATCACATAGTTCTACTAATTCC
TCTTCCTCATCATCCAAAATAAAATCACAACCAATAAAAGATTATAGTAAATGGGTGATA
TGTCGTGTATATGAGAGCAAAGGAGATGACGACGACGACGGAACGGATCAGCTCTCTTGT
TTGGATGAAGTTTTCTTGTCATCATTGGATGATTTTGATGAAATAAGCTTACCAAATTAT
AACTAA
>CaNAC02
ATGGAAGGAAAACAAAAGGGTTCCAGTTACACTTTTCCACCTGGTTTTAGATTTCACCCT
TCTGATGAGGAACTCATAGTTCATTACTTGCAAAAAAAAATCAAATCACTTCCACTTCCA
GCTTCTATTATAGCTGAAATTGATCTATATAAGTATAATCCATGGGAGCTACCAAAGAAG
TCTTTGTTTGGGGAGGAAGAATGGTATTTCTTTAGCCCGAGAGATCGAAAGTACCCAAAT
GGATTAAGGCCAAACAGAGCAACAGGTTCAGGATACTGGAAGGCAACAGGAACTGATAGG
CCAATTATTTCTTCATGTGGATCAAAGCATATAGGAGTGAAGAAAGCTCTTGTGTTTTAT
TCAGGTAGACCTCCTAAGGGAGCTAAGACAGATTGGATCATGAATGAATATAGGTTGATT
GACACAACAACAAAATCTTTCATGCTAAAAGGTTCCATGCGATTGGATGAGTGGGTATTG
TGCCGAGTTCGACATAAAGGCTATTCATCAAAGAATTTATCTGAAAATCAAGAAAATCCT
TGTGAACCAAATATACCAGTAAACCTACAGACGAGTGAAGAACATCCGACAAACACGAAG
TTTCGAGCTGACATGATCACAGATTATCAATACAAAGACTATCAGATCATAGCCTCGATT
CTTGTTGGTGGAGTTATACCTCCAAATGAGAACATGTCAAGTTTGAGCTTTAAGGGAAGC
AAAGGCAACAACCTAACTTCAGAGTATGAAGAAGGTTCCAATAAAGTGAATTCTCAAACT
GCAATCCCTTCTTTGGAATGTTACTTCAACCCACTGAAAAGAAAATCTAATGAGGATGAT
GATCAGTTTGAGAATCTCATTTCTTTTACAAGCAAGTTCAACACTGAGAACAAAATAGAC
AAATCTTTTAACAAGGTCTTGACCAATAGAGAATTGAACTGCTATGAGATTTTCAATGGG
AGCACACCAAATCCTAGCATCGATTTTCAAGAACTAAATGAATTAAACTTTGCAGAATGA
>CaNAC03
ATGACTCAGTGTAGTTACCCTGAAAATAATCATAGTACTGTCATTGTGGAGAGGCGTAAA
GATAGCTTAATCAGAACTTGTCCTACATGTGGTCATCATATCAAATGCCATGAACAGGCT
GCTGGAATTCATGAGTTACCTGGATTACCTGCTGGAGTGAAGTTTGATCCTACTGATCAA
GAGATTCTTGAACATTTGGAAGCAAAAGTGCGCTCTGATATTCAAAAGCTTCATCCTTTA
ATTGACGAGTTCATTCCTACTCTTGAAGGAGAGAATGGAATCTGCTGTACTCATCCAGAG
AAGTTACCAGGTGTTAGCAAAGATGGCCTACTCAGACATTTCTTTCACAGGCCATCAAAA
GCATACACAACAGGAACAAGAAAAAGGAGAAAAGTGCACACAGATGAAGATGGAAGCGAG
ACAAGGTGGCACAAAACAGGTAAAACAAGACCAGTCTATGTGAGTGGCAAGTTAAAAGGG
TATAAGAAAATCCTTGTGCTTTACACTAACTACAGAAAGCAGAAAAAACCAGAGAAAACA
AATTGGGTTATGCACCAATACCACCTTGGAAACAATGAAGAGGAGAAGGAGGGGGAATTG
GTAGTTTCCAAAGTTTTCTATCAAACACAACCTAGGCAATGTGGTGGTTCATTGATGAAA
GATTCATCAATGATATTTTCTGATAAACTTAATGGTGGTCAAGATGTGCATGAGGTAGTT
AATCATAAAAACAGTGGATTTGTTGAATACTACAATACTTCTTTCATATCATTTGATCAA
GGGGAGCAACAACATAGATCAAGCAATGCACAAGTGATTTCTCATTTTCCTGTTCATGAT
GGTACTCCTTTCATTCCTTGA
>CaNAC04
ATGGAAATGGTTTCCAAGGAAGCTCAGATGTCTATTGCTGCTTCCTCTATGTTTCCTGGT
TTCAGATTCTGTCCCACCGATGAAGAGTTGATTTCTTATTATCTTAGGAAGAAATTGGAT
GGTCACGAAGAGAGTGTTCAAGTTATTTCTGAGGTTGAGCTTTGTAAATATGAACCTTGG
GATTTACCAGCCAAATCATTCATTCAATCAGATAACGAGTGGTTCTTCTTCTCATCGCGT
GGAAGAAAGTATCCAAACGGTTCACAAAGTAAAAGAGCTACTGATTGTGGCTACTGGAAA
GCTACCGGAAAAGAGCGCAACGTGAAATCGGGTTCAAACGTCATAGGGACGAAGCGAACT
TTGGTGTTTCACTTAGGTCGTGCACCTAAAGGCGAAAGGACAGAATGGATAATGCACGAG
TACTGCATCAGTGACAGGTCTCCGGATTCTTTGGTTGTTTGTCGCCTCAAGAAGAACACA
GAGTTTCGTCAGAACGATGCTTCCAATAGAGCCTCATCAAGTCATATGAATGCAGTTAAT
TCACATGAAAGTGATTGTGCTGCTTCAGAAGGTGGTATTGATCAAAGGGGTGTCTGTGAA
CAAGACAAGGAGGTTGATGGTAGCTCCAAGCGTGGCAGCAGCAGTTATGGTTCTCCTTCA
ATGGAACAAATTGATTCCGTGTCTGAATCAAATCAGCGACCAGCTAATGACACTACTTTG
ACAGAATCTTCCGGCCACCTAAAGATGGATGAAGAGGATTGTTATGCAGAGATACTAAAG
AATGATATCATAAAATTAGATGAATCATCAATGTCTCAAGGGGCTCAAACAAGACCACCT
GACCCTGCCAATTCTCAACCCTGCCAAGGCACTGCGCAACGAAGAATACGATTAAGGGTT
GAGAAATCGACGCATTCTCAACCTGGAGTTCGTTTCTCAAGAACAATGCATCAGTCCAAG
AGTAGCTCCTTTGCCAGAATGACCAACCATTTGATGATATTTGCTTTCTTTGTTATTGCT
CTGATGGTTTTATTTTTTTGGTCTTTATTGGGTGGTCACAAACAAATGAAATATTGTGTG
AAAATATTGGGTGTAAATTTAGTCATGTCGAGGCCTATGTTGCTTGTTTTCTTGTTGATT
ATACTTATAATCACTTCCCAGTTTGAGTGGAAGCAACAGCTTGTGGCCGATGTTGAATTG
AATCCCGCTGTATCTCAAAAGCAGCATCATATTTCTACGGCTGAAGAAACCGTTAAGGAG
AAGATTATTTTAGTGCAAGAGAAGAATATCCGAAGACTGAATGAGCTTGTGCGGCATCTT
CAGGAACAACTGCAGCAGTGTAAAGGAAGCAATGGAACTATAAATAGTACTGTAGGCCCT
CTAACTGAGCGGATTCTTGAGCTTGAGCGGCAACAAATTTTAGAGGATTAA
>CaNAC05
ATGGAAAGTACTGATTCATCCACCGGTTCGCAACAACCGAATCTCCCGCCTGGATTCCGA
TTCCACCCCACCGATGAAGAGCTTGTTGTTCATTACCTCAAGAAAAAAGCAGCTTCAGCT
CCTTTGCCTGTAGCCATCATCGCTGAAGTTGATCTCTACAAGTTCGATCCATGGGAGCTA
CCAGCTAAGGCAACGTTCGGAGAGCAAGAGTGGTATTTCTTTAGTCCAAGGGACAGGAAG
TATCCTAATGGTGCTAGGCCAAACAGGGCTGCTACATCTGGTTATTGGAAGGCAACTGGT
ACTGATAAGCCCGTTTTGACTTCAGGTGGAACACAAAAAGTTGGTGTGAAAAAAGCTTTG
GTTTTCTATGGTGGAAAACCACCAAGAGGGATTAAAACCAATTGGATCATGCATGAGTAT
AGGCTTGCTGATAATAAGCCTAATAATAGGCCTCCTGGTTGTGACTTGGGCAACAAGAAA
AACTCTCTAAGGCTTGATGATTGGGTGTTATGCCGAATCTACAAGAAAAGCAACACACAT
TGGTCACCTGTGGAACATGATAGAGAAGATTCAATGGATGATATGATAGGAGGAGTACCT
CCATCAATAAACGTGGGACAAATGAATGCAAGGTTTCATTTTTCAAAGATGTCAAATAGC
TACAACAATACATTGTTGGAAAATGACCAAAATTTATTAGAAGGAATGATGCTAAGCAAT
AACAACAACAATAACAATACCGTTGCTACTTTGTCATCACAATTAGGAGGTTCTGCTTCT
ACTTCCAATGCTTCTGCTTCAAAAAGAACACTCTCTTCACTTTATTGGAATGATCATGAA
GATGTTGCAGCTTCTAATAAAAGGTTCAATTTGGAAAGTGATCATCATCATGGAAGTGTT
GTGAGAAATGATCAAGAAAGCGGAACCGTCGCTACATCTTTCGCTTCTCTCCTTAATAAT
CTCCCTCAAACACCTAATTCATTGCATCAACAAACAATGTTGGGATCAATAGGTGATGGT
TTACTTAGAACAACACCATATCAAATTCAAGGCATGAATTGGTATGGTTAA
>CaNAC06
ATGGGAATTCAAGATAAAGACCCTCTTTCACAATTGAGTTTGCCTCCTGGTTTTCGTTTT
TACCCCACCGATGAAGAGCTTCTTGTTCAATATCTTTGTCGCAAAGTAGCTGGTCATCAT
TTCTCTCTTCAAATCATTGCTGAAATTGATCTCTACAAATTTGACCCATGGGTTCTTCCA
AGTAAGGCGATATTTGGTGAGAAAGAATGGTACTTTTTCAGTCCAAGAGATAGGAAGTAT
CCAAATGGGACTAGACCCAATAGAGTAGCTGGATCTGGGTATTGGAAAGCTACTGGAACA
GACAAGATAATCACAAATGAAGGTAGAAAAGTTGGAATTAAAAAAGCACTTGTTTTCTAT
GTTGGTAAAGCTCCTAAAGGCACCAAAACCAATTGGATTATGCACGAATATCGTTTACTT
GATTCTTCTCGAAACAACACCGGCACCAAGTTAGATGATTGGGTTCTATGTCGTATATAC
AAGAAGAACTCTAGTGCACAAAAAGCCATTCCAAACGGCATCGTTTCAAGTAGAGAATAC
ACTCAATACAGCAACGATTCATCCGCGTCTTCATCCTCCCACCTCGACGACGTTCTACAA
TCACTTCCAGAAATCGACGACCGTTGCTTCATGCTGCCACGTGTCAACTCATTAAGAACA
ATGCAACATCGTCAAGAAGAAGACAAGCTTAATCTTCTTAATCTCAATAATAATAATTTA
ATGGATTGGTCTAATCCGTCGTCAATTCTCAATACAGAGTTTCAAGAAGGACAAAATAAT
GGAATGGTTAATTATAGTAGTTGTAACGATCTCTATGTCCCTTCTGTGTCCACGATATGT
CACGTGAACACATCGGGGACAGAGAAGAAACCAATGGAGGAAGAGGTTCAGAGTGGTGGA
GCAAGAACAAACCCCGGATTATTTGAACGTGGTTCGAATAATTTTACTTATTCTAATTCG
GTTGATTCGTTTGGGTTTAGGTATCCGGTTCAACCGGTTGGGTTTGGGTTTGGGCAATGA
>CaNAC07
ATGGCTCCAATGACTCTACCACCTGGATTCAGATTCCACCCTACAGATGAAGAACTTGTT
GCTTACTACTTAGAAAGAAAAATAACAGGTAGAACTATAGAGCTTGATATCATTGCTGAA
GTTGATCTCTACAAATGTGAACCTTGGGATTTACCAGAAAAATCATTTCTTCCAAGCAAG
GATATGGAGTGGTATTTTTATAGTCCAAGAGATAGAAAGTATCCAAATGGGTCAAGGACT
AATAGAGCAACAAGAGGTGGTTATTGGAAAGCAACTGGAAAAGATAGGGCAGTGAACTCT
CAAAAGAGACAAGTTGGAATGAAGAAGACACTTGTTTATTACAAAGGTAGAGCACCTCAT
GGTATTAGAACAAACTGGGTTATGCATGAATATCGCCTCATGGAATCACATCCTGGTGCT
TCTCTTTCATCTTTAAAGGATTCATATTCATTGTGTCGAATTTTCAAGAAGACAATTGAA
ATTCCAACAAAACTTAAAGAAAATCAAGAACAATTAGAGGACACAAAGAAGGAACAAGGG
CAAGGTGAAGATTCAAGTGGCACTGAAATTTCAAGAGAAATGGAAAATATGGATCATGAG
AAAGTTCTTAATAATCATGAACATCCAAAATTTCCATGTGATGCTTCTTCTTCTGATGTC
ACTCAAGGAACATACACACCAACAAATACATGTAATAATATAACCGATGATTTTCAACCA
CAATTTGCTTGTGATGAAGCAAATAGTGCATCTATTTCTTATCCAATGGGCATAGGCTAC
CCCTCAAATATATTTCAGGATATAGAAATACCTATGTATGGTGGTTTCCATAATCATATT
CCAGAAGCACCTTTTATGATGGAAGATTTACCACAAATAAACATAATGGATACAAAGTCA
ACATTAATGAAGCCTGAAATGATAATCACTGATGACTGCATTTTGTATGACAGATACAGA
GATTGTATGAATGGAACACTAGAAGAAATAATCTCTTTGTGTTCTTCTCAAGATCATTCT
ATGGCTTTTCCAATGCTATAG
>CaNAC08
ATGATGCAGGGAAGTGGACAGTTAACAGTTCCACCAGGGTTCAGGTTTCACCCTACTGAT
GAGGAGCTTCTTTACTATTACCTAAGGAAGAAAGTTTCTTATGAAGCCATTGATCTTGAT
GTTATCAGAGAAGTTGATCTTAACAAACTTGAACCTTGGGATCTCAAAGAGAAATGTAGG
ATAGGATCAGGGCCACAGAATGAGTGGTATTTCTTCAGCCATAAAGACAAGAAATATCCA
ACAGGAACAAGAACAAACAGAGCAACTACAGCAGGGTTTTGGAAAGCTACAGGAAGAGAC
AAAGCAATATACCACACAAATTCCAAAAGGATTGGAATGAGGAAAACCTTAGTCTTCTAC
ACTGGTCGTGCTCCTCATGGCCACAAAACTGATTGGATCATGCATGAGTACCGCCTTGAC
GACAATGATGCAGAAGTTCAGGAAGATGGATGGGTGGTTTGCAGAGTATTCAAAAAGAAA
AATACAAGTAGAGGCTACCAACAAGAAATTGAAGAAGAAGATCACATAATGAACCATATG
AGAACAACAAATGCTCCATGCCATAATAATATTCTAGAACCAAAACATCATCATCACAAG
CAACAACAACAAGGATTACTATATGATTACAACAACAATAACAATAGCTTTGATGCTACA
ATTCATCTACCACAGTTATTCAGTCCAGAATCAGCTGTTCCACCACCACCACCAACTTCA
TTTCCTTCATCCATGGACATCCTTGAATGCTCTCAAAACTTGTTGAGGCTCACAACTCCT
GCATTTTCTGGACTCAATCTCATGCAACAACAAGGAGAGAGGTTTCATGGTGATTGGTCA
TTCTTGGATAAACTACTTGCATCTCATAATGGCATTGATCATCATCACACTTTAAGAAAC
AAATGTAATACTAATAATCAGCATGGTGCAGCACCTTCTGTTGAAACTTCAGCTCACAAA
TTTCCATTTCATTACCTTGGTTGTCACTCTCATCATGATATTATGAAATTTTCAAAGTAA
>CaNAC09
ATGGATAACTTTTACCATCATCACCATAACCATATCATCAACAATAATAATAACAACAAC
AACAATAACAGTGATGCACATTTGCCACCTGGATTTCGTTTCCATCCAACAGATGAAGAA
CTAATCACATTTTATCTTCTGAAAAAAGTTCTTGACAACACTTTCACTGCAAGAGCCATA
GCTGAAGTTGATCTCAACAAATGTGAACCATGGGAGCTTCCTGAGAAAGCTAAGATGGGT
GAAAAAGAATGGTATTTCTTCAGTTTACGTGATAGGAAGTATCCAACTGGTTTAAGAACT
AATAGAGCAACAGAAGCTGGTTATTGGAAAGCAACAGGAAAAGACAGAGAGATTTATAGC
TCTAAAACTTACTCTCTTGTTGGAATGAAGAAAACCCTTGTTTTCTATAGAGGTAGAGCT
CCTAAAGGTGAAAAGAGTAACTGGGTTATGCATGAATATCGCCTTGAAGGAAAATTTGCT
TACCATTTTCTCTCTAGAAACTCCAAGGATGAATGGGTGATTTCACGTGTGTTTCAAAAG
AGTCACACCGGAACCGGAAGCTCCACCGTATCAGCCACCACAAGTGGTTCAAAAAAGACC
AAAATAACCTCAACAACTTCAGCAAGCAACAATAGCATGAGTCTATGCCCTGAACCAAGT
TCACCTTCTTCAGTTTACCTTCCACCTCTTCTTGATTCATCTCCTTACACTGCCGGCACC
GCTGCAACCGCATTCGACAACCGTCAAATGTGTACTTACAACAACAACAACAACGACAAC
AACAGCTCCAACAACACAACAAAGGAGCACGTGTCCTGTTTCTCCACAACATCAACAACA
TCAAATGTTGTCTCATGTCATAACAACTTCAACAACAATAATGGAAGTTTCGATCTTGTT
TCTCCTTCTATGAATGCTATGGATCCATTTGCAAGGTTTCAAAGGAATGTTGGTGTTTCT
GCTTTTCCAAGCTTGAGGTCATTGCAAGATAATCTTCAGCTTCCTTTCTTTTTCTCCACG
GCGGCGCAGCCTTATCACGGTGGTGATAATATTCTCAGTGGATGGGGGTTGCCGGAGGAG
CAAAAGGTGGTTGATACTGGTGGTGTCGTTAACATGGGAGGGTTAGGTTCCTCTGAGCTT
GATTGCATGTGGAACTATTAA
>CaNAC10
ATGGGTGTTAACGATGATTTCAACAAAGATAATGAATATGTTGACGATGATGTTCCACTT
CCTGGATTTCGATTCCATCCCACTGATGAAGAACTTGTTACTTTCTATCTTCGAAGGAAA
CTTGATAACAAATCTATTGCTATTGATCTCATCAAACAAATTGATATCTACAAATATGAT
CCTTGGGATCTTCCAAAAGCAAGTGTACCTGGAGCAGAGAAGGAAAGTTATTTTTTTTGC
AAAAGAGGAAGAAAATATAGGAACAGCATTAGGCCTAATAGAGTAATAACAGGATCTGGA
TTCTGGAAAGCAACTGGAATAGATAAAGCAGTGTATTCAAATGGAGGAGAAGGAAATGAT
TGTGTTGGACTCAAAAAAACATTAGTTTATTATCGTGGTAGTGCTGGTAAAGGCACCAAA
ACTGATTGGATGATGCATGAGTTTCGTCTTCCTTCTAATATTCATACTAACAACAATGAT
GCTCATATTGCCCAAGAAGCAGAAATTTGGACATTATGTAGAATTTTCAAAAGAAATGTA
TCACAAAGGAAACAACAAATTGCAGAGGTGAAACAATTAGCTACCAAGCGTCAGATGATT
CATGACAAGAGCAGCAGAATGAGCAGCAATGTGGAATTTAATATAAACAATCAACAAACA
TTTATCAATTTTGGTGCAAGTCATGAGAATCATCATAATAATAATATTGAAGACAAACTC
ATGATCAATACTAATTATACAAACATTGATCAAAGGAATCATCAGTTAATGAGTTGTCAA
GTGTCACAACAACCTCAACAAAATGTAACACTATCTAATTCAAACTTGTGGATAAAGCAG
CAGGTTGAGAATGAGCTCTTAATGTTTGATAATTGGGATGAGCTTGGATCAGTTGTTAAG
TTTGCTGTTGATTCGCCTAGTTTGTAA
>CaNAC11
ATGAGCAACATAAGCATGGTAGAGGCAAAGCTTCCACCAGGGTTCAGATTCCATCCAAGA
GATGAAGAGCTTGTGTGTGATTACTTGATGAAGAAGGTTACACATAGTGATTCTCTTCTC
ATGATTGATGTTGACCTTAACAAGTGTGAGCCATGGGATATTCCTGAAGCAGCATGTGTG
GGAGGGAAGGAGTGGTATTTCTATACACAAAGAGACCGAAAGTATGCAACAGGACTGAGA
ACAAATCGTGCAACTGCATCAGGGTATTGGAAGGCAACAGGGAAGGACAGAGCTATCCTT
CGCAAGGGCAGTCTTGTTGGGATGAGAAAGACTTTAGTTTTCTATCAAGGAAGGGCACCT
AAAGGGAGAAAAACTGAATGGGTCATGCATGAGTTTCGTATTGAGGGTCCTCATGGCCCT
CCTAAAATTTCTTCTTCTAAGGAAGATTGGGTTTTGTGTAGGGTGTTCTACAAAAACAGA
GAAATTGCTGCAAAACCAAGCATGGGTAGTTGCTATGATGACACAGGCTCTTCATCTCTT
CCAGCATTAATGGATTCGTACATAAGTTTTGACCAAGCTCAATTCCATGCAGATGAATAT
GAGCAAGTGCCCTGCTTCTCCATCTTTTCTCAAAACCAAACCAACCCAATCTTCAATAAT
ATGGAACCAAAATTACCTCCATACAACAATAACAATAATAATAATGCAAACACATTTGGA
GGAGCACCTAATTTGGGTAATTATAGCTTAGACCCTTTATCATGTGATAGAAAAGTGTTG
AAAGCTGTTTTGACTCAACTATCAAAAATGGAAAGAAATAACCCACTTAATAATAATAAT
AACAATAATAATCAAAGTCTTAAAGGGTCACCAAGCTTAGGAGAAGGAAGTTCTGAGAGT
TACTTATCTGAAGTAGGTATGCCCCACATGTGGAACAATTACTAA
>CaNAC12
ATGGAGGAAAGGAGTAAGATGGATAACTATGATGAAGTTGATGATGTCATATTGCCAGGT
TTTCGTTTTCGTCCAACAGATCAAGAACTTATTGGTTTTTACCTCAAGAAAAAAATTCAG
CAAAAGTCTCTTCCTATTGAACTTATAAAGCAAGTTGATATTTACAATTATGAACCATGG
GATCTTCCAAAGCTGGCTAGTACAAGTAGTGAAAAAGAATGGTATTTCTACTGTCCAAGG
GAGAGAAAATATAAAAATAGTTCAAGACCAAACAGAGTAATTACTAGAAATAATGGTAAG
TCAATTGGATATTGGAAAGCAACTGGAACAGACAAAGCTATATACTCATCAGATGGAAAA
TGCATTGGTTTGAAAAAATCACTTGTGTTCTACAAAGGCAGAGCTTCCAATGGGAATAAA
ACTGATTGGATGATGCATGAGTTTAGGCTACCTTGTATTTCTAACTCAACTTCTCCTAAA
AAGTTGTTTGATAAAAGCTTCTCCCCAAATGATTCATGGGCAATATGTAAAATCTTTGAG
AAACCTACTTCTTCATCAATGGTTCAAAAAGCTTTATCTCACCCTTGGATATCTCAATTA
CCTGGAGGAAGAGTTTCTGAATTACTCACACAAACTTCAAACACCAACCAATTATGTTCA
CAAAGTAATATATCTTTATCCACAAAAACAGAACAAGAATCATCAACCATCAAATTTTGT
AGCAACAACACCAACAATTTCTCACCTTCATATTTTCCAAATTACACAATTTCCAAATCC
TCACAAATTCCTAATGGAGACAATGTTGTTCATAATAACATAATGTTATACAACACAACT
GAAGCCACAGATTCTACAAAGTGCCCAATTGATACAAGTTCAATTATTTCCAATACTAAC
TATATTGGTCTTGAAGATGCAAATAATCAATATAGTAATTTCTCAATTAATCTACCTAAA
GATATTCAACCAAACATTGGAACAGAATTAGAAGAACAAGATTGGAAGAAGAATCCATAC
TATTGGGAAACTATAGGAAGAACAATTGAATTTCCCTTCAATTTGTCTCCAAATTATGAT
GCTTTGAGGGAAAATTTTACATGGGACTCTCTTCCTTGCACTAGTGAAATGTCTACAAAC
TATGTCACCAGTGTAGCTAAATGCTACACGTAG
>CaNAC13
ATGATGGATGCAATGGAGAAAAAATCAAGAGATCTAGAAAGTGATGAAAAATTTGAATTG
CCACCTGGATTTAGGTTTCATCCAACAGATGAAGAACTCATAACTCATTATCTCTCTCAA
AAGGTTCTTAATAGTTGTTTTTGTGCTATAGCCATTGGAGAAGCTGATTTAAACAAGTGT
GAACCTTGGGATTTGCCTTGGAGGGCCAAAATGGGTGAGAAAGAGTGGTATTTTTTCTGT
GTTAGGGATAGAAAATATCCAACTGGCCTAAGGACAAATAGGGCTACATGTGCTGGATAT
TGGAAAGCAACTGGAAAAGACAGAGAAATATTTAGAGAGAAGACACTAATTGGAATGAAG
AAAACTCTTGTTTTTTACAAAGGAAGAGCTCCAAAAGGTGAAAAAACAAATTGGGTCATG
CATGAATATAGATTAGAGGACAAATATTCTTTACAAAATACATCCAAAAGGACTATGAAG
GAGTGGTCTATTTGTAGAGTTTTTGAGAAGAGTTCTTGTGGAAAGAAAATGCATATTCAA
GATTTGGTAAGGTTCAATTCAATTGGAAAAGAATTACCTCCTTTGATGGATTCTTCTCCA
AACAATAGTGAATTAAAAAGTACTATTGGAGATTCATCACATGTGACATGTTTCAATCAA
AATCTAATTGAGGATTCTCAAAGGATACAAAATGATAACATAATTGATAGTTTTGAAAGT
CCTATTTTAACATCTTCATATTCATATTCTTCTAACCCTTATGATAATAATATTTCCTCT
GCTTCATGGACACAAAATTTGTCACACCAATCAACACAAGTTGTGAATTCAAAATCTTCA
GATTGTTTTATGGTTCAAGAACAATCCATGTTGAGGATGTTGATTGAAAATCATGGAACA
AGTACAAAGACAAAATTTGAGAAAGATCAAGAATGTGATTTTGATGTTGACATTTCATCT
ATGATATACAACAATGAAATGTTTCAAGTGAATCAAGAATATTCAATAGGACATTTGGAC
AATGGTTTCTTATGGAATTTCTGA
>CaNAC14
ATGGATGAACCTATTGTGTTGAACAAAGTTGATGAATCTCTTGATTTGCCTCCTGGTTTC
AGATTCCACCCTACTGATGATGAAATCATTACTTGTTATTTGATTAACAAAGTGTTGAAT
AGTAATTTTAGTGCAACTGCAATTGGTGAAGCTGATTTGAATAAGTGTGAACCTTGGGAC
TTACCTAAGATGGCAAAGATGGGAGAGAAAGATTGGTATTTCTTTTGCCAAAGAGATAGA
AAGTATCCAACTGGAACAAGAACTAATAGAGCAACTGAATCAGGGTATTGGAAAGCAACT
GGAAAAGATAAAGAGATCTACAAAGGGAAAAGTAACCAACTTGTTGGAATGAAGAAAACT
CTTGTGTTCTATAAAGGTAGAGCTCCAAAGGGAGAGAAAACCAATTGGGTTATGCATGAA
TTTAGATTGGATGGCAAATTTGCAACTTGCAATCTTCCTAAGGATTCAAAGGATGAATGG
GTTGTATCAAGGATTTTCAACAAGAGCAACACAGAGATTAAAAAGAATTCATTTTCCAAT
CTTTTGAGGATAAATTCATTAAGTGATGATCTATTGGATTTTTCTTCACTACCACCTCTT
GTGGATCCACCTTTTAGCAACACTATCAATTCGCCACCTTCATCATCCTCTAAACCGCCA
CCAAATGGTAATTATTTTCCAAGTTACTTAATCAACAACAATATTCAAAATCAAATTCCA
TCATATAACATTGCCACCAACCAAGAGAATACATTTTCTCATCAACCTCAAAATCAAATC
CAAATTCAAAATTCAAGCTCTCAATTGCAACAAAACATGTTATCAAATTATTCTTATAAT
ATGCAACAAGGGAATCACAACAATACTTATATTTATGGATTGGACAACAAAGAGTGCAAG
ATGGAACAATTCTCTACCAACAATTCTATGGTAAGTGTTTCACAAGACACATGTTTGAGC
AATGACATAAACACTGACACATCTTCAGTGGTCTCAAAGCAAGAAATTGGAAGGAATACA
ACATTGTATGAGGATTTTGAGTGTCCTTCATCAATTGGTCCTCTCTCAAATTTTGAATCT
TTGTGGAATGACTATTGA
>CaNAC15
ATGGAAGAGAGAAATGATGGTGAAAAACTTGATGAAGTTTTGTTACCAGGGTTTAGGTTT
CATCCAACTGATGAAGAGCTTGTTGGGTTTTACCTAAAGAGAAAGATTCAACAAAGGCCT
TTATCTATTGAGCTCATCAAACAACTTGATATCTATAAATATGATCCTTGGGATCTTCCA
AAGTTTGCTACTACAGGAGAGAAAGAGTGGTATTTCTACTGTCCAAGAGACAGAAAATAC
AGAAACAGTGCAAGGCCTAATAGGGTAACTGGAGCTGGATTCTGGAAAGCTACAGGAACT
GATAGACCTATCTACTCCTCAGAAGGTTCCAAGTGCATTGGTTTGAAGAAATCATTGGTC
TTTTACAAAGGCAGAGCTGCTAAAGGTGTCAAAACTGATTGGATGATGCATGAGTTTAGA
CTACCTTCTCTCATTGATCCACTCTCACCAAACAAGTATATAGACAAAACTATTCCAACT
AATGAATCTTGGGCTATATGCAGAATATTTAAGAAAACAAATTCTACAGCTCAAAGAGCT
TCATCTCAATCTTGGGTTTCTTCCCTTAATTCTGAAACAAGAACCTCAATGCTAACAAAA
AATCAAGAAACCACCCAATTTTGTTCAAACAACATGTCACAAACAAAGAAAACTACCCTA
CCCAACAATTTCTTCACTAACAATAATAATAATACCCAAAATTTTGATGTTGATGTTGAT
GTTACTACCCCTTATAAATCCATTATTAATCCACTACTACACAAAGCCTTTGACCACTTA
CCCATTTCAAATAATGATCTTAACACAAGCTTGATATTTTCATCATCTCCACTTGAAACA
TCCAACACTAATATTAATTTTTCAAAATCTACAATGGATGTTTCATCAATGCTGTTGAAT
ATGTCATCCTCAATGTTTGTTGGTGATTTTAGCAAAACATGTGATGAGGATATAACTACA
AATTTCAATGATGGGTTGCAAGAGCATTTTAGTGACTACTCAACATCATTTCTACAAACC
ACATTTGGTAATAACCAATATGATAATAATGCATTGGTAAAGATTAATCCTTATTATTAT
AATAATGTGAATGTGCCTCGTGTTGATGATCAAGATTTCAATATTGGTGATGCATGGAAG
TCAAATTTGCTTTGGGATACTTCATTTTGTCCTTGTGATGTTCCCTCTACTTATTATTCA
ACTACTAAGTGTTATACTTAG
>CaNAC16
ATGAATGGAAGAACAAGCTCTGATCTTCCACCAGGTTTCAGATTTCACCCAACTGATGAG
GAATTAATTGTTTATTACCTTTGTAACCAAGCAACATCACAACCATGTCCTGCATCTATC
ATCCCTGAAGTTGATATCTATAAATTTGATCCATGGGAATTACCTGATAAATCAGATTTT
GTAGAAAATGAATGGTATTTTTTTAGTCCAAGAGAGAGAAAGTATCCAAATGGGGTGAGG
CCAAATAGAGCAACTGTTTCTGGGTATTGGAAGGCTACTGGCACAGACAAATCAATCTTT
AGTGGGTCTAAACATATTGGGGTTAAGAAAGCTTTGGTTTTTTATAAGGGTAGGCCACCA
AAGGGCCTCAAGACAGATTGGATTATGCATGAGTATAGGTTAATTGGATCAAGAAAACAA
GCCAATAGGCAAATTGGATCCATGAGGCTAGATGATTGGGTGTTGTGTAGGATCTATAAG
AAGAAGAATACCACAAAATCATTTGACACAAGAGAAGAATACCCTACAAATCAAATCAAT
GTATCACCAAGAAATGATGATGATAGTGAACAAGAATTGATGAAATTTTCAAGGACATGT
TCTCTAACTAATCTTTTGGATATGGACTACTTGGGTCCAATATCACAAATATTATCAGAT
GGATCATATAACTCAACATTTGAATATCAAATTAACACTGCACATGGTGGAATAATTGTT
GACCCATTTGTAAAATCACAAATGGTTGAAATGGCTACTAACTCTTATGCAGCTGATTCA
GAGAAAAACAATGTGAAACAGAATAGCAGCTTCAATTCAACCTTATTTGGGAATCAAGTA
TATGACCATAGAGAATAA
>CaNAC17
ATGGCTCTGAATTTTCCCTCAACTACTAGGATTATCAAACCCACAGATGAAGAACTTTTC
CAATCATTCCTCTACAACAAAATTAATAATAATCCATTGCCTAATCATATAGCTATCATC
GAACTTGATTTGTTCGGTACAAAAAAGAATCCTTGGGAGATTTGGGAAGAGTTTGCAACT
TCCCACTCATATTGTGGAAGAGACCTATATTTCTTCAGTGCATTGAAGAAGAAATCTGCG
ACTAGCTCTCGTTCTGTTCGTCTTATTGGAAAAGGTACATGGGAAGGTGAAGACACCGGT
ACAGAAATATTCACTAAAGACACAAATCAACTCTTAGGTTTGAGAAAACGATACCGTTTT
GAAAAGAGTGATACTGTCCATGATAATGGATGGATCTTGCATGAATATAAACTTGATGCA
TCATTGATTGCCAATCCTTCGGCGGAGAATTATGTTCTATGCAGATTTAGAAAGAATGTG
AAAAAAAATCCAGTTAGTACAAGAAATAGAATAGCAAAAAATGCGAATCGTAGGTTACAA
AGAAATAATACAAGTATGGGAAATACTGGACGGGGTAGAAAAAGGAAGAAGACCGTCGCT
GAATGTGAGGCTACCACCATATCGGGCAATAACAATAACAATGTTGTGGTGAGAGAATAT
ACTATATATGAAGAACCAATAAACCAATCAAATGGTGGACACAACAGTTCAAATGATGGA
CACAACAGTTCAATGGTGGTTAAAAAAGAGTATGAATACAAGAAGGGAGTAGAAGAAGAA
GGTGTGAAAAATACTTGTCCAAATGATATCATTGTTATTGCACTTGAGTCTTCCACCGAT
TCTGGGAATGAAAATATTAACCAAAGACCAAGAAGTCCAATTGATAGTGGAAATAACAAG
ACTGAGGTGGTTAAAACTACCAAAGAAAAAGAAGTTGATAGCATTATGAACAAAGAAGAA
GATGATAATCTCAATATGTCTTGGCCAGAGTATTTTGCAATGGAACTGAAAATGATTAAT
GAAGGATGCTTGATCCAAGAGGAAGAATATGTTCCGATGCTTTCCAATAGTTTTCATAAG
GACTTAATCTTGGAATGTTTTAATATGTATTAA
>CaNAC18
ATGGCGGGACCATCATGGCTAGTGGACAAAAGTAGGATTGCAACCAAAATAAGAAGTGCA
TCAGGAGCATGTCATCCCGAAAATGTTACATGGAAAAGCAATCCATCCAAGACTTGCCCA
AATTGTCAGCATGCTATAGACAATAGTGATGTTGCACAAGAGTGGCCCGGCTTGCCAAAA
GGGGTCAAATTTGATCCATCTGATCAGGAGATAATTTGGCACTTACTTGCAAAAGTTGGT
GTAGGAAATTCAAAACCTCATCCTTTCGTTGACGAGTTTATTACTACTCTTGAAGTGGAT
GATGGAATTTGTTACACTCATCCTCAAAACTTACCCGGTGTTATGCAAGATGGAAATGCA
TCCCACTTCTTCCACCGAGCAGTTAAGGCTTATAACACTGGCACCCGAAAGCGCCGAAAA
ATACATGATCAGGATTTTGGTGATGTCCGTTGGCACAAAACTGGAAAAACTAAACCAGTA
ATTCTGAATGGAGTCCAAAAAGGCTTTAAGAAGATTATGGTTCTATATATGAGCAGTGTC
GGAGGAGGAAAAGCCGAGAAAACAAATTGGGTTATGCACCAGTATCATCTAGGAACAGAT
GAAGAGGAAAATGATGGGGAGTTTGTTGTCTCTAAAGTGTTTTACCAGCAGCAGCAAGTC
AAATTGGGTGATAAAAATGAATTGGACATTCCTGAAGCCACTGAAGCAACAATTATTAAA
GTGGATCCGGTTACTCCCAAATCTGTGACTCCTGAGCCTCCTTATAATGAAAGGCAGTAT
TCAGATGTAGATCTAGGACAAGAAACACCTGCCATTCCTCAGCCTCCTCAGATGGATTGT
CTGGATGAAATACAAGCTGATTGTGAAGAGCATGCAATAGATGATTTATCCATGATAGAA
ACTGAAAATAATGAAGAGACATATGATAAAGAAATTAATGCTGATGAAGGCCAAAAATGG
TGGGATAGTGAATCACAAAATCTGTTGGATTCACAACAACTGGTTGAAGCATTGTCCTTG
TGCGATGATTTACTTCATAGCCAGTCTCCCGAAAGAGATGACGAACATGGAGAACATAAG
AACCAACCCAGTCTTTCGGTTTATGCCCAGCTTGGACCAGAGCATCTGAAAAAGGATATT
GAAGACTGTCAAAATCTTGTCCTTGACCCTGCAAATACAGCAGAGCACGACGCACCTCCT
TCGGAGTTACGACTAAGTCAACTGGAATTTAGTTCGCAAGATAGCTTTATTGCTTGGGGT
TACAGCAAGGCATTAAAGTAA
>CaNAC19
ATGGCACCTGTTTCATTGCCTCCAGGTTTCAGGTTTCACCCTACCGATGAAGAACTTGTT
GCTTATTATCTAAAAAGGAAGATCAATGGTCGAAATATTGAGTTGGAGATCATAGCTGAA
GTTGATCTTTATAAGTGTGAACCTTGGGACTTGCCAGGAAAATCATTATTACCAGGGAAT
GATATGGAGTGGTATTTCTTTAGCCCTCGAGATAGGAAGTACCCGAATGGATCAAGAACG
AATCGTGCAACAAAATCTGGATATTGGAAAGCAACAGGGAAGGATAGAAAAGTAAATTCA
GAAGCTCAAGCAGTTGGGATGAAGAAAACCCTAGTTTACTATCGAGGAAGAGCACCTCAT
GGTTGTCGCACTAATTGGGTTATGCATGAATATCGTCTTCATGATAGGGAATGTGAAACT
ACATCAGCATTGCAGGATGCATATGCTCTTTGTCGTGTGATCAAGAAGAATACAGTCATT
GTGCCTAAAGTTGGGGGACAATATGGTAATCTTACAACCCATGATAACCAAATTACAACC
GTTTCTCAAGGAAGAGGTGAAGATTTAGATAGTTCAAATTATTTGATGCAAATCAACACT
TGTTCACCTCACAATATTGGAAATCAGATTTCACTCAATAGGGATCATGGAAATTGCTCA
CACTTCTCATATGATGATCCATCATTCACTCTTCCAACTTCTTCATCATTTACTAATCAT
GGACCTATAGCATACCCTCCATCCAAGGTGGATATTGCACTAGAGTGTGCAAGGATGCAA
CATAGGTTTACTATGCCTCCATTGGTGGTGGAGGACTTTCCTCAAGGAAGCAAAACTAAA
ACTGATATCTTGCAAGAAATTCTTTCACATACTCATGCTTCTCAAGAATTGATGAATCAA
TCAAATTATTCACAAGCGTATGATGACAATGAAAATTATGCTCCTTGTGAAGATGATTTT
ACTTTCATGGTTGGCACAAACTATAACCACATAAATGATTTGAACTCCATGAGTTATGTT
GACAAACCTTGGGAAGATTTGAGCACAAGATCTATAGAGATAGGTGATCAAGATGAAGAG
TTTAAGGAAAAGAGGATGGTAGAGAATTTGAGATGGATTGGAATGCCAAGAGAAGATTTT
GAAAAGATGGCAGAACAAAAGGTTGTCCAAATTGAGGATATTTCATGCTTCCAAACAATA
AGGGAGCAAAATGGCATGCAAGAATATGACCAACACAATAGCAACCTTGATGTCAACGAA
TTCTCAATAGGATTCATCAATGATGGTGACCCCAATGAAAATTTTATAGAAGATGGTAAC
ATGGATGATTACTCAAGTTCTCCAAGCTTTTATGAGGTCATTGAGGAAATAAAGGTGAGT
CATGGATTGCTTGTTTCAACTCAACAAGTAGCCATGACATTCTTTCACCAAGTTGTTCCT
TCACAAATAGTTCAAGTTCAACTCAATCCAAAAATGATAGAAAAAAATAACCACTCTATA
AAGAATGTAGAGGCAATGATGATGATAATGGAGAATCAAGGATCTCTTTTTAGGAAGTTC
AAGGCCTATGTGATGGGGAATTTAATAAATCCATCTAAGAAAATAGCAAGTTTGGTTGTA
TTTTTATTTTCACTTCTTTTGATGCATTGTGTTTATATGGAGAAAGAAGTGGAAATTTGG
AAACAAAACCTAGAAAATGTGAAAGAGAAAAGAATGAGAGAATCATATGAGATTATCAAA
TGGAATGAGTCAAAAGAGGTTTGGTTTGTTGGTGTTAAAAGTGAGAAAGGATTAAGTGTG
GTCTTGAAGAAAATAGGCATTTTCCTCACCATGTGTTTGGCTCTTTGTTTCATGTGGGCA
AGCCATAGTAATTAA
>CaNAC20
ATGGATGTGAGCAAGTTACAAAACTCTAATGAGAAAAAAGAAGATGAAGTTGTGCTTCCT
GGATTTAGATTCCATCCAACAGATGAAGAGCTTGTTGGATTTTATCTACGACGAAAGGTG
GAGAAGAATCCTCTTCGAATTGAACTCATCAAACAAATTGACATCTACAAATATGATCCA
TGGGATTTACCAAAAACAAGTAATGTGGGGGAGAAAGAATGGTATTTCTTTTGCCTAAGA
GGAAGAAAATATAGGAACAGCATAAGGCCAAATAGAGTGACAAAATGTGGATTTTGGAAA
GCCACAGGAATTGATAAGCCTATATATTGTGTTAAAGAATCTCATGAATGCATTGGACTC
AAGAAATCATTGGTTTACTACCGTGGAAGTGCAGGGAAAGGCACCAAAACTGATTGGATG
ATGCATGAATTTCGTCTTCCACCCAAAGGAAAAATTAACAATCATGATGTTCAAGAAGCT
GAAGTGTGGACGTTATGCCGAATATTCAAAAGAATCCCATCATACAAGAAGTACACACCA
AATTTGGAAAAAGACTTGGCAACAACGGTCACTAATTCTTCAAGTTCCAAAACATGCAGC
TTAGAATCTGACAACAGCAACAAGCCATACTTGACTTTCAGAGACTCACAAGTTGTTGTT
CAACAAAATGAAAGCAAACCATTTATTAATGGACAACTTGACCAAAGCATTAACTACTCA
TTTTTAAGTCATGTAGCTCATGAAGCTCCAACAACCTTGTCTCACTCATGTTTTTGGAAT
GATCACAGTGTGGGGGATGATGCTCTTGCAAATGAGAATTGGGATAGTCTCAGATCTGTG
GTTCAATTTACCTTTGATTCATCAAAGGTTTATGATGATTGTAAATACTTTAACTAG
>CaNAC21
ATGAATTTAGTGAAGAAGAAGAATGGAGAAGTGAAATTACCACCAGGATTCCGTTTTCAT
CCAACAGATGAAGAGCTTGTTGTTCAATACTTGAAGCGTAAGGTCTTCTCTTACCCTTTA
CCCGCTTCCATCATTCCTGAACTTCATCATCTTTCCAACTCTGATCCTTGGGATTTACCA
GGTGATTTGGGAGAAGAGAGGTACTTTTTCAGCACTAAAGAAGCCAAATATCCAAATGGA
AACAGATCCAACAGAGCAACTAACTCTGGTTACTGGAAGGCAACAGGGTTAGACAAACAA
ATTCTAAATTCAAATTCAAATGTTGTTGTTGGTATGAAAAAGACTCTTGTTTTCTACAAA
GGCAAACCCCCTCACGGTTCAAGAACTGATTGGATCATGCATGAATATCGCCTCACTAAT
CATTCTTCCTCTCTGAAACAAAATTGGGTTGTGTGTCGCATATTTCTGAAGAAGAGAGGT
GGTGCTAAAAATGGAGGAGGAAGAGGAGGAGAGAACACAGTAACAGTGAGAGAGAAACCC
AGCAAAGTAAAGAACTCAAACTCAAACTCAAACTCAAAGGTGGTGGTTTTCTATGACTTC
TTGTCATCCCCAATTTTATCAGCAACAAGTGGAATAACAGAAGAACACAATGAAAATGAA
AATGAAAATGAACATGAAGACAGCAGTAGCTCATTTCCTTCGTTAACAAATAATAATTAA
>CaNAC22
ATGGGATCAATGGAGAATGTTTCCGTACCAAAAATGGAAGAGGAAAAGTTTGAATTTCCA
GTTGGTTTTCGATTCCATCCAACAGATGAAGAACTCATAAATCAATACCTTGTCAAGAAG
GTTGATTACAATAGCTTCTGTGCTATAGCTATTGCTGAAGTTGATATGAATAAGTGTGAA
CCATGGGATTTGCCTGAGTTGGCTAAAATGGGAGAAACAGAATGGTATTTTTTCTGTATG
AGGGACAGAAAATACCCAACTGGTCAAAGGACAAACAGGGCTACTCTTGCCGGCTATTGG
AAGGCCACAGGCAAAGACAGAGAGATTTTCAAGGAAAATGCATTAATTGGGATGAAGAAA
ACACTGGTTTTCTACAAGGGAAGAGCCCCAAAAGGTGAAAAAACCAATTGGGTCATGCAT
GAATTCAGATTGGATGGTATCAATCTTTCCGAGCAAAATCTATCCAAACCAGGAATGGGT
GAATGGGTTATCTGCAGAGTCTATGAGAAGGGTGATTATGGAAAGAAAGTGCATGGTCCA
AAACTTGGAAGGTTTGACTCTAAAGAAGGAGCATCAACTACTAATTCACTGTTGCCTCCA
TTGATGGATTCTTCTCTATACAAAAGCGAAACAAAGTTCACTACTGGTGAGTTCTCTCCG
GTGAATTCTTTCTCCATTCCAAATCAAACTCAGAATCAGAAAACACTAGATGACATTGTT
GATAACAATGGAACTAGTATCTTGAACATTTCATGCTCTTCAAAAGCCATTGATGATTAC
CCTCTAGCTGAAGCAGCATTTGCAGTCTCCAATCAATCTTCACAGGTTGCACCCCAGATT
GGGAATCCACAGTATTCAAATTGCTTTTTGTCTCAAGAACAGTCCATGTTGAGGATGCAG
CTGGAGAATGAGAATCTTGAATCAAGTGCAAAGCAATGTGTAAAAGCAGATTTCTCTGTA
GGGAGAGATTTTGATAGTGATATCTCCTCAGTGGTGTTTGGAAGGGACATACTTCAGAGG
TGGTTTGGAAATCCAGAATTATCACCAGCTTCTACAGGGCCTGTGGTCACTGATAGCTTG
TGGAATTTCTGA
>CaNAC23
ATGGCTTTGGACTTCTTAGCTGAGTTCGACCAACCAGATTGTCGTAGGTTACCTGTTGGA
TACAGGTTTGATCCAACTGATGATGTTCTTGTGTGTTTTTACCTCAAGAAAAAGGTCTAT
AATTTAACTCTTCCATATCATGCCATTCTTGACTTTGATGTGTTTCAGACTGAGCCATGG
TTGCTGCCAGGAGATTTGAATGCTTTCAAGGACAGGAGGTACTATTTCTTTGACATAAGG
CAACGTGAATTTGACAACATGGATATAAGACCTGCTGGAAATGGTGAATGGAGAACCATT
GAAAAAAACATGGAACTTGATCTCCCTAGTCAATTCTTTGTTGGTAAGAAGAACACCCTT
GTTTTCTGGTGGAAAAAACAGGGTAACCAACACATCATGACAAGATGGATGATGCATGAG
TTTCGTCTCACCACAGTAATTCAACCAACTAAGATATCAGCTGTTGGTGCATATCGCATA
TTTAAGAGGAAGTTGGAAAAACCTTTGAGGAATAACATCATCAGACCAGTTGTGATTGAT
TTCACAATGGAAGATGCAACTGCCTGTCCCCCTCCACCTCCAATGTCTCCTTGA
>CaNAC24
ATGGGAACCCCACAGTCCAATTTGCCACCAGGTTTTAGGTTCCACCCAACTGATGCAGAG
CTTATACTTCACTACCTTAGGAAGAAAATTGCCTCCATTCCCTTGCCTGTTTCCATCATT
GCTGAAGTTGATATTTACAAGTTGGATCCATGGGAATTACCAGCAAAGGCTTCATTTGGT
GAGAAAGAATGGTACTTTTTCAGTCCAAGAGATAGAAAGTACCCAAATGGTGCAAGGCCA
AACAGGGCAGCTGCTTCAGGGTATTGGAAGGCTACTGGCACTGACAAGACCATAGTGGCA
TCATTGCCAAGTGGAGGGAGAAGGTCACATGACAACATTATTGGTGTCAAAAAAGCTCTT
GTTTTCTACAAAGGAAAACCCCCAAAGGGTGTTAAGACTAATTGGATCATGCATGAATAT
CGCCTTGTAGATAACAACAAACCTATTAAGCTCAAAGATTCCTCCATGAGGTTGGATGAT
TGGGTACTATGCCGAATTTACAAGAAATCAAAATGTGCACTATCTTTAACAGAGGCAGAA
ACAATGGTAGGTGATGTAGATCAAGCAAAAGAGACCCAAATAAAGGACACCCTTTTCCAA
ATCACAAAAAATTCAACCTCTCCTAATCAAAACACACTTATGTCTCAAAAATCAATGTCA
TTCTCCAACCTTTTAGATGCTATGGACTATTCCATGTTAAGCAGCTTCTTATCTGAAAAC
CATTCTAACCCATCAGGAATTGGATCAAGTACAAGTTTCAACACTGAAAATTTTAATCAA
CCATCCTCACAAATCAACACCAACAACAATTACATGTTTCAGAAGAACACTTCAAAGCAA
CAACTTTCAAACATAGATGAAGACACTTTATTATACCAATCAAAGAAATACTTGAATTCC
TCTTGCAATTTCCCTAACATTAATTCCCAATACGAGAATTACCTCATGAAGCAATCTCTA
TTGAATCAACAATTGATTCTAGGACCTCACCTCCAATTTCAAGGCTAA
>CaNAC25
ATGGAAGAACCAATAGTTGTTAATAAAGGTGAAGATCAAGGTCTTGATTTGCCACCAGGG
TTCAGATTCCATCCAACTGATGAAGAGATAATAGTTTGTTATCTAACTGAGAAAGTCAAG
AATAGCAAATTCAGTGCAACTGCTATTGGTGAAGCTGATTTAAACAAGTGTGAGCCTTGG
GATTTACCAAAGAAAGCAAAGATGGGAGAGAAAGAATGGTACTTTTTTTGTCAGAAAGAT
AGAAAGTATCCAACTGGGATGAGAACAAATAGAGCAACAGATTCTGGTTATTGGAAAGCA
ACAGGAAAAGATAAAGAGATTTTCAAAGGAAAAGGAAACCTTGTTGGAATGAAGAAAACT
CTTGTGTTCTATAGAGGTAGAGCTCCCAAAGGGGAAAAGACTAATTGGGTTATGCATGAA
TTTAGATTGGAAGGAAAATTTGCTAATTATCATCTTCCTAAAGCAGCTAAGGATGAATGG
GTTGTGTCAAGGGTTTTTCACAAGAACACAGATGTTAAAAAGACACAAATTTCTGGTCTT
TTAAGGATGAATTCAATTAATGATGATCTTCTAGATTATTCTTCACTTCCACCTCTAATG
GATCCATCTTATACAAGTGATGAATTAAAAGGAATCACTAATCAAATATCATCATCTAAA
TCACAATCAGACGGCTATTATCTTCCAAGCTTTTCAATCAATAATCACAATCAACTTGTG
ATCAAGCCAGAAGATCATAACCATAGAAACTATGATCAGACTCAAACCATCATGAACTAC
ACTTCCAATATTTCCAATTCCATTCAATCAAATCTCAACAACCCAATTGGAAACACACTC
TCACAACCACAAATCCGAATCCAAAATCAAAACTTGAACTACTTTGTTTATCAACAAAAT
AGGATGCAAAATGTTAATTCTATCTCAAGTTTTGGAAACAACCATGATCAAGCTTTTGTA
AGACCATTTGGAGCTAAGAATAATAGTGAGTGCAAAATGGAACAATTCTCTTCAAATCAA
TCACAAGATACAGGTCTTAGCAATGACACGTCATCAGCGGTATCCAAACAAGACATGGGA
AGAAATAGGGCATTGTATGAAGATCTTGAAGGTCCATCTTCATCAGTTGCACCTCTCTCT
GATTTGGAATGCTTGTGGGACTATTGA
>CaNAC26
ATGGGTTTGAGAGACATAGGAGCTTCACTTCCTCCTGGATTTCGATTTTATCCAAGTGAT
GAGGAATTGGTTTGTCACTATCTTTACAAAAAGATTTCAAATGAGGAAGTTCTTAAGGGT
ACTTTGGTAGAAATTGATCTTCACATATGTGAACCATGGCAGCTTCCTGAGGTGGCAAAG
CTGAATGCAAATGAATGGTATTTCTTTAGCTTTAGGGACAGAAAATATGCGACAGGGTTT
AGAACAAACAGAGCAACAATATCTGGGTATTGGAAAGCAACGGGGAAGGATCGAACGGTG
TTAGATCCAATGACGCAAGAGGTTGTAGGGATGAGGAAGACATTGGTGTTCTATAGGAAC
AGAGCTCCAAATGGTATCAAAACAGGGTGGATTATGCATGAATTTCGATTGGAGACACCA
CATATGCCTCCTAAGGAGGACTGGGTTTTGTGTAGAGTCTTTCACAAAAGCAAAGAAGAC
AACAATAACAATAACAATTCCAAAATCAACACACAACAACTCATGTATGAGACAACACAT
CCATCCCTAACTTTGGCGTCATCATCTCCAACAAACCAAACCATGCCTAGTGTCTATAAC
CGAATTGATTCTTTTTCTTCCTCTATGACAACACTTCATCATTTAATTCCCAACCAAAAC
AATTCTTCCATGATGAATCTCCTTCATTATTCTCGTGATACAAATCCAAATAATAATAAT
AGCACTATTACTCAAATTAGTTCCAAAGGTGATCATGATGGATATGGATTCTTGTGGAAC
ATGGATTTGGAAGAAAATAGCCTAGAAGATGGCGTGGCCTCAAACTTGGACGCGATAAGA
TTTGAGGTTGATAATAATAATATGGTCTTACTATAA
>CaNAC27
ATGGACAAAAAAAATCATCATTCAGAAATTCAACTCCCTCCTGGATTTAGGTTCCACCCT
TCAGATGAAGAGCTCATTGTTCACTATCTAAGAAACAAAGTCACTTCATCTCCTCTTCCT
GCTTCATTCATAGCAGAAATAGATCTTTACAAGTACAATCCATGGGAGCTCCCAAGTAAA
GCTTTGTTTGGGGATGAAGAATGGTATTTCTTTACTCCAAGAGATAGAAAGTATCCAAAA
GGATTGAGGCCTAATAGAGCAGCTGGTGCAGGTTATTGGAAAGCAACTGGAACTGACAAA
CCTATTTTTACTTCATATGGGTTGAAAAGCATTGGAGTGAAGAAATCTCTTGTGTTCTAT
AAGGGACGTCCACTAAAAGGGTCTAAGACTGAGTGGATCATGCATGAGTATAGGTTGCAT
GATTCAATTATCTCAAATTCCAACCATAGTGGGTCTATGAGACTGGATGAGTGGGTGTTA
TGCCGAGTTCGACAAAAAACCGGCAGCCCAAGAAGCAGTTGTGAAGATTCAAACGAACTT
AGTTTTGAAACATCAAGTCACTTTCAGCAAATGAATGACAACTCTAGTCCTGAACCAGTC
AAAAACTATGTGCAGAAACAGAATGAATATCCAATGTTACCTTATATTTTAGCTTCTAAG
AGTGTTCTACCTAATTCCATTGGTATGTCCTCAAACAATGAAAAATCACATGCTTCATTG
TATGAAAACAACTTAAACATAATAGGAGCACAGTTCTTATCATCTGCCGCCGAAGGATTG
TTTAATCCGCAGAAGCGAAAAGCCGTTGAAGAGAATATTGAGATGGACTTTTATGCTGTC
CTCAATAAAAATCTAAGCAGAGAAGTCGATGATGTGAATCAAAGACTTGAGATAGATTTA
AGCAAAGGGTACAATTCCTACAACTTTGATCAGTGGACTTCAATCATACAACCTCAAGAG
CTTAATAGCTTAGCCTTCACTGGATATACATAA
>CaNAC28
ATGGAAAACATGCTACCGGGTTATCGTTTCTATCCTACAGAAGAAGAGCTTATTTCCTTT
TATCTTCACAATATGCTTGAAGGAGATAATGAATATAAGATTCGTACTGTTATACCTGTC
GTTAATATTTATGACTACAATCCATCGGAACTCCCACAAATATCCGGAGAGGCAAGTATG
AGAGATATGGAGCAATGGTTCTTTTTCATTAAAAGGCAAGAAAGTGAAGTGAGAGGAGGA
AGACCAAAGCGTGTCACAACTACTGGGTATTGGAAAGCCACTGGATCTCCTAATCATGTT
TATTCTTCTCATAATCATATTATAGGTATGAAGAGGACTATGGTTTTCTATAGTGGAAGA
GCTCCAAATGGGAAGAAAACCGATTGGAAAATGAATGAGTATAAGGCCATCCAAGACCAA
CCATCCTCTTCAAATAAATTGGCTCCTATGTTAAGGAATGAAATGAGTTTATGCCGAGTG
TACAAGAAATCAAAATGCTTGAGAGCATTTGATAGACGACCGGCACCAAGGAGGGTCACA
AACGATCAAGAGTTCAATAAGGATTCAACAATATGCAATCATAATAATGTTCAAATATTT
GCAACAAGCTCACCAGATAGCTCTTCATCTCTAGACCATGGTCAAACCTCAAATGAGGTT
GGAGAAGGTAGTCAAATGGATATTAATGTTGATCACCGTGAGCCTTTGTTGTATTGGGAG
CATGTGGATTGGTTCTTGGGAATAGAACCATGA
>CaNAC29
ATGGGTCTTAGAGATTTGGGTGCTTCACTTCCCCCTGGCTTTCGGTTTTATCCAAGTGAT
GAAGAATTAGTCCTTCATTACCTTTACAAAAAGATCACAAATGAAGATGTTCTTAAGGGT
ACCTTGGAGGAAATTGACTTGCACACATGCGAGCCTTGGCAACTTCCTGAGGTGGCTAAG
CTGAACGCAACCGAATGGTACTTTTTTAGCTTCCGTGACCGTAAATATGCCACAGGGTTT
CGAACCAATAGGGCAACGACATCTGGCTATTGGAAAGCAACGGGGAAGGATCGAACGGTG
TTTGATCCAATTACGCGTGAGGTTGTAGGGATGAGGAAAACGTTGGTGTTCTATAGGAAT
AGAGCTCCAAATGGTATAAAAACAGGTTGGATTATGCATGAGTTTCGGTTGGAGACCCCA
CATATGCCACCTAAGGAGGATTGGGTTTTGTGTAGAGTATTTTACAAAGGAAAAACAGAC
AACAGTGCCAAACTAAGCCCACAAGACATGTATGAGACTTTACCCCCATCCCTAACTTTG
GATTCATTATCTCCAACCAACCAAATCATGCCAATTGGGTATAACCAACTTGCTTCTTTC
TCCTCCTCAATGACAACCCATCATTTTCATAATCCAAATGTGAACCAAAATAATTCTTTG
ATGAATCTCCTTCAATTTTCTAAGGAAACAAACACAAATTGTAGTAGTGTTACTCAAATT
AGTCCCAAATGTGATGATGGATATGGATTCTTGTGGGACATGGATTTGGATGGTGTGGCC
TCATCAAATTTGGATGGAATGAGATTCGAGGTTGATAATAATAGCATGGTCTTGTTATAA
>CaNAC30
ATGGGTCACGAAACTCTCTTACTTCCAGCCCCACCTACCACAGTTAACCCTCCACTCTCT
GCTTCTTCTACTGCAGCACCACCTACCTCTCTTGCTCCTGGTTTTAGGTTTCACCCAACT
GATGAAGAACTCGTTATCTATTACCTCAAACGCAAGGTTTGTGGAAAACACTTCCGATTT
GATGCTATTTCCGAAGTTGACATATACAAGAGCGAACCCTGGGACCTAGCAGATAAATCA
AGGTTGAAGACAAGGGACCAAGAGTGGTATTTTTTTAGTGCATTGGACAAGAAGTATGGA
AATGGTGGCAGAATGAATAGGGCTACTAGTCAAGGGTACTGGAAAGCTACTGGAAACGAT
CGGCCGGTTAAGCATGACCTAAGGACTGTGGGGTTGAAGAAAACTTTGGTGTTTCATAGT
GGTCGAGCTCCGGATGGTAAGAGAACAAATTGGGTTATGCATGAGTACAGGCTTGTTGAT
GAAGAGATGGAGAGGGCTGGGTCTGGGCCCTCTCAGCCTCAGGATGCATATGTCTTGTGT
AGAGTATTTCACAAAAATAACATAGGACCTCCAAATGGGCAACGATATGCACCCTTTGTT
GAAGAAGAATGGGATGATGGATTGGCAATGGTTCCCGGGGCAGCGTCCATGAATAACGGC
TCTGTTGACCGCATATTGCGTCTTGAAGGCAACGGTGGTGTTTCATGCAGTGAAGGAAGA
AATAATGTTGCACAGGACTCACAATCCAACAACAATAAAGCTCCGCTTGACGTGAACAAG
CTACCGATCGAAACTCAAAATCTTCTTGCTGTGTGCAAGAGGGAGAGCCAGGCCGAGTAT
CCATCACCAGAAAAAGATGATTCAAAGCATATGCATGTGGATGAGTACCCATCACCCCAA
ACCGATAACCCGAAGCCTTTACCTCAGATATACAAAAGGCGAAGACATAACATGAACTCC
AACCATTCCAATGTTTCTGGAGATTCCTTCCCCAACAGTCAGGATCCATGCTCGTCCACA
ATAACCACTGCCGCGACAACACTCCCGACAACCGCGGTCACCACCACAACTACCAACACT
GCACCGAAAAAACATTTTCTGTCCGCACTGGTGGAGTTTTCTCTACTGGAATCACTTGAA
TCGAAGGAAAACCATACCTCGGTTCCGCCAGTGGATTTTGACATGGATAGTCTTGAGACG
TCCGTGCCTCCGAGTTGCGCAAAGTACATCAAACACTTGCAGAGTGAGAAGCAAAAGCTT
GGTGTTGAAAAGGAGACTATGCGGTTCGAGTTGATGAGTGCTCAAGCCATGATCAACATT
CTCCAGTCTCGCGTCGAAATTATCAGTAGAGAGAACGAGGAAATGAAGAGGATGATGAGA
AATCCTTAG
>CaNAC31
ATGGCTGTTTACAACTCACCTGGATTCCGATTCCACCCTACCGATGAAGAACTCGTTTGT
TTCTACCTGAAGCGCAAGCTCGCAAGAAATTTACCATCCTGTTTTGACCATCTCGCTGTC
ATCGATATCTACAAGTTCGAGCCATGGGACCTTCCCAGTTTGTCGAAGCTGAAAACTAAG
GATTTGGAATGGTACTTTTTCACTGTGCTTGACAAGAAGTACGGTCATGGTATAAGGACG
AATCGTGCTACCGATAGAGGTTACTGGAAGACTACTGGAAAAGATCGCATTGTCAAAAAC
GGAGAGGACACTGTTGGAATGAAGAAGACTCTTGTTTATCACTCGGGGCGGGCCCCACAT
GGTGATAGAACAAATTGGGTGATGCATGAATACAGGATGATTGATGAGGAGTTGGCCAAA
GCTGGATTGCAGAAGGATACTTATGTGGCGTGTAGGATCTTCGAGAAGAGTGGTTCGGGG
CCTAAGAATGGGGAGAAGTATGGGGCTCCCTTTGTGGAGGCGGAATGGGAGGGTGTTGAT
AATCGGGTGGATCCCTTGCCGGCTGTTGATAATGAGCCTTTGAAACAAATAGTTCCATCT
GTGCCGGCTATTGATAATGAGCTTTTGAAACAAATAGTGCCTGTTCCTGCTGCTAGCGGT
GATGATTATGTTGAAGCTGATGACCTCAAGCAGGAGCTTGAAACTAGTGTCACAGTTGGA
AGCGCTGATCCTCCATCAAACTTCTACTATGGGGAGTGTAGTAGCCATCCTCAGCTTTCC
CAAACATTTGTTAATGATCATATGCAATTGGAAGCCAGTTTCGGTATGTATGATCCAGTG
CTTGACCAGCCTGATAATATGGCTGGGCAATATGGCCAGGATACCAATTTAGTACAAGAT
GGAGACTATGGTGAGCTAAACCTTGGCGAGAATCCTCTGAATTTCAATTTTGCATCTGAT
GATCCAGATCTATATTTTGACGCCACTGGTTATCTTACGAGTTTGGGAGAGGAGTATATG
GAAACCAATGATGTTGAGAATCTTGACGAGATTTCCCCCCCCGAGATAGATCCATCTGTT
GCTGCAATGCTAGATGAGTACCTTAATTACCCTGCTGGGGATATTTCCAAACATATATCC
TTCGATTCTCCTTTGAGTATAGGGTGTGAAAGCCCTATTGCCAACCCTGTACAGCCTTTC
ATTGAGCAGAATGTGGAGGACGAAGCCAATGGTAGTTCCTTGGCAAACAAACAGGTTTCT
GAAGCACAGTCTAGTAATGAAGCTATCCCAACGGAGGATCCAGAGGTGTCAAGTTGGGTC
TCAGGAGATACAAATCCTTTTGTAAAGCAGGCCAATAAATTGTTGGCCAGCTTACCTGCT
GCACCTGCATTTGCTTCAGAGTTTCCTACAAAGGAGTTTGCTCTTAGGATACATCCTGCA
GCTCAGTCTTCCAGTTCAGCTCATATAACTGCAGGTATGATCAGCATAACAGACATTACT
TTTAGAGGCAATGCGATGGATTGGATGGTGGGCAAGAATGGAGGTTTTAATACCATAATG
TCTACTGGGTTTTCCCAAACGGATGGTAATTCGGCTACTTTGGAGCCTATTTCTGACCTG
GTCTGTAGCAAAGCCGCATTTGTGTTATCACATAGTTGGGTTTTCTTGACGGGCTTCTCA
GTTGTGGTTCTTTCACTGAGTTTCAAGATCGGAAGCCTCATGTATACTGGTAAATGA
>CaNAC32
ATGGATATGGAATCATGTGTACCACCAGGATTTAGATTTCATCCAACAGAAGAGGAACTT
GTGGGGTATTATCTGAACAGGAAGATTAACTCACTCAAAATTGATCTAGATGTTATTGTT
GAGGTTGATCTCTATAAAATTGAACCATGGGACATACAAGATAAATGCAAGCTAGGATAT
GAGCAACAGAATGAGTGGTATTTTTTCAGCCACAAAGATAAAAAGTATCCAACAGGAACA
AGAACTAACAGGGCAACTGCTGCTGGATTTTGGAAAGCAACTGGAAGGGATAAAGCTGTT
ACTTCAAAAAACAGAATCATTGGAATGAGGAAGACTCTTGTTTTTTACAAAGGACGTGCC
CCTAATGGAAGGAAAACTGACTGGATTATGCATGAATATAGGCATCAAACCTCTGAACAT
GCCCCTCCACAGGAAGAAGGATGGGTTGTGTGCAGAGCATTTAGAAAGCCTAGTCCAAGC
CACAGGCCAGGTTTTGAACCATGGTGTAGTAGTAGTAGTAGTCAACATCAACATCAACAT
CAACAACCACACTATTTCAGAGATGAAACCTATTCAACAACAAGACCCTTATCAATAACA
GATATTTTTCATGAAGGTACAAGTTATAGTCACCCTTTTAGCACAGAACAGCAACAGTTT
CTATCAAACCAAACACTTATTATGGACAAAAACCTCATTGAACTTCCACAACTAGAAGAA
TGTAACCAATTACAACATCACAATAATGAAGATTGCAATGAAGAAAGGAGCAATAACAAT
ATAGTAGATTGGAAAAGCTTGGACAACTTGTTCACTTCACAATTTACAGATACAACAACA
GCTAATTACTTTTCACATCAAAACTTGCCATTGATGATACCTCATAGTCATCATGAGCTG
CAATCTTCAAATCAAGCTAATCATATCTTAGGATGCTTTCCTGATTCATAA
>CaNAC33
ATGGGTGCGGTTTCGGAATCTGCTTCTGCTGATTGTTTCAGTGAGGTGATGTCGTCGATG
CCCGGTTTTCGGTTCCATCCCACAGATGAGGAGCTGGTGATGTACTTTCTGAAAAGAAAG
ATTTGTGGGAAGAAGTTGAAGTTCAACGTGATTTGTGAAACTGACGTGTACAAGTGGGAT
CCTGAGGATTTGCCTGGACAATCTTTTCTGAAAACTGGAGATAGGGTATGGTTCTTTTTC
TGTCATAGAGATAGGAAGTATCCTAATGGTGCGAGGTCTAACCGAGCAACAAGGCATGGC
TACTGGAAAGCAACAGGAAAGGATCGAAATATCATATTCAATTCTCGTTCTGTTGGAGTA
AAAAAGACACTAGTTTTCTATGTAGGCAGAGCTCCTAATGGTGAGCGAACTGACTGGGTT
ATGCATGAATATACCATGGATGAAGAGGAGCTTAAAAGATGCCGTGATGTTAAGGACTAT
TATGCACTTTACAAGGTTTTCAAGAAAAGTGGACCTGGTCCTAAAAATGGTGAACAATAT
GGTGCACCATTTAAAGAAGAAGATTGGGCAGATGATGATGATGTAGCTTTTAAAATTAAT
TCACCTGAGAAGGAGGCTCCAAATGCTGTTATTGATCCTCTAAATGGTCAGATGCAGCCG
TTGTTTGACGATGAAATTGATGAAATCATTAAAGAGATTTTTGATGTTGAGCCTGTCCCT
GACCAGCAATATGTGAATGGATATGTTGACTTTCCTCAGGTTGTTGGTGAAGAAACACAA
AGTATGATCCTGGGTCAGTTCTCTGAGGCCGTGATATTCCCGGAGGCAAGTGGAGAATTA
CAATCTTGCAGTCAGTATTATGATGTGCAGCCCAGCTTTGACTTCAATCAATCAATTGCT
TCTCCCTTGCATTTTTCTGAATCACCTGAGCTCGCTTCTGCTCCCGACATTGAAAGTGAC
TTTCAAGAGGACGGCTTCTTGGAAATCAACGACCTCATTGACACTGAACCTACATTTTCA
AATACCGAAAAGCCTGTGGAGAACCTCCAATTTGAAGATGGGTTAAGTGAATTTGATCTG
CACCAAGATGGAGAGATGCTTCTCCGTGAGCTGGGGCCTGTTACCGGCGAACCAGTTTCT
CGTGCATATATGAATAACATTGGCAACAATATTGAAAATCAGAGTTACCAGCTGACGCCT
TATCCAGAAGACACCAATCAAATGGTTGATGAATTCTGGATGCATTTTGAAAGAAATACC
CTGAGTCCAGCCGAAGGCTATGCTGATTCTTTCTCTCTAACAAATCCAGGTGTTGTTTGT
GATTCTGTCAGCTTTCCTTCTGAAAGCACTGAAAATCGAAGAAGCACTGTGGAAGATGTT
AGTACTACAAGTAGATTCTCCTCTGCTCTTTGGGCTTTTGTTGAGTCGATACCTACCACT
CCTGCATCAGCTGCTGAAAATCCTTTGGTGGGTCGGGCTTTGAATCGAATGTCTAGCTTC
AGCAGGGTGAAGATCAAGCCAACCAATATTGCTGCAGGTAATGACACTGCAACTGTGAAG
AGAGCAGGCAGAAAGGGAGTCTCATTCCTTTTCTTCCCGATTCTTATTGCTTTATGTGCA
TTCTTGTGGGTTTCTATTGGAAATTTAAGACTACTAGGGAGATGCATCTCGCCTTGA
>CaNAC34
ATGGCTCTCGATTCTCTTCCAAGCAGGAATTTGAAACCCACAGATGAGGAACTTCTCAAA
TCATTCCTCTACAACAAAATTAACAATAACCCTTTGCCCAATCATATCAACATTCTTGAA
CATGATTTGTTTGGTATCAAAAAGAACCCTTGGGAAATTTGGGAAGAGTTTGAAGCTTCA
CACTCATATTGTGAAAAAGACTTATATTTCTTCACTCTCTTAAAGAAGAAATCAGCCACT
AGCTCTCGTATGGTTCGTACTATTGGAATGGGTACATGGGAAGCTGAAGATGCCAAAAAA
GACATAGTTGATAAAGAAACGTGTCAACTCTTAGGTAATAAAAAACGTTATCGATTTGAG
AAGAGTGGCACTATCCACGATTATGAATGGATCTTGCATGAATATAAACTTGATATGTCT
TTGATCAACAATTTTTCGGCCAAGAATTATGTTCTATGCAGATTTAGAAAAAATAATATA
AGAAATAAAATCAAAATGCCAAGAAAAAGTACAAGAACAAAGAATGTTGGCCAACATAGA
AGAAGGAAGATCATCATTGAACGACCGGAAACCACCGTATCGGAGAAAAATAATGTTTGG
TTGGAGAAAAATACTGACCAAAGACCAAGAAATCAAGTAGACAATGGAAATAACAAGATT
GACGTTGTTAACACTATCAATACATCAAAGTCTAAATATAACAAAGTAGAAGATGAGGAA
GATGGCGATCAAAATATAATTGAGCCAGAGTTATTTGCAATGCAATTGAAAAGTGTTAAC
GAAGGATGCTTGATCGAAGAGGAAGATGTTCCAATGATTTCCAATGATTTTTATAAGTAT
TTATTGTTGGAAAATTTTTACATTAAGTAA
>CaNAC35
ATGCAAAAGAACAAAGAGGTTATTAACAAAGAAGGGAAGGGGATGGAAATTGAAGGAATT
CCTCTTGCAAAAGAGGAAACCCTACCTCCCGGTTTTCGATTTCATCCGACCGATGAAGAA
CTCATCACTTACTATCTTGTAAACAAGATTTCAGATTCTGATTTTAGTTGCAAAGCAATT
GGTGAAGTAGATCTCAACAAATCTGAGCCATGGGAGCTTCCAGGGAAGGCAAAGATGGGT
CAAAAAGAATGGTATTTCTTCAGTCTAAGAGATCGCAAATACCCAACAGGTGTGAGAACT
AATAGAGCAACAAACACTGGATATTGGAAAACCACAGGCAAAGACAAAGAGATATTTGAC
AATGTTACATCTGAATTGGTTGGTATGAAGAAGACTTTGGTTTTTTACAAAGGAAGAGCT
CCTAGAGGAGAGAAAACCAATTGGGTCATGCATGAATATCGTATTCATTCAAAATCCACC
TATAGGACCAACAAGCAAGATGAATGGGTGGTTAGTAGGGTATTCCGCAAGAGTGTTGGA
GCAAAGAAGTATCCTTCTTCAAACCCTACAAGAGCAACATTAAACCCTTACAATATTAAC
CTAGAAGTTGGCCCTAGCATTAACATGCAACCACAACCAATGATGCATCTAGGAGATCAT
TCAACTACTCATTTTCTCTATGGAAGAAACTACATCAACACTCCTGACCTAGTTGAAGTC
AATAGGGTTCTAAGATCAAGTGGTGTTGTACCATTACCAATGCAATATTCCAATTTATCA
TCATCACCCTTAGGATTCACCATTTCAGGGCTTAATTTGAATCTTGGAGGAGCATCAACA
CAACCATCAACTCAAGTGCATGATTTTAGCTCCAACATGATGACTACTACTACTACAACC
CTTGGTGGAGAGAATCATAATAATAATAATAATTTAGGGTATGGTGGAGAAGTGAATATT
AATGCAAATCCTAATGGAAATAATAGGTACATGGGTATGGAACATTGTGTGGATCTTGAT
AATTACTGGCCATCTTACTGA
>CaNAC36
ATGGCAATAGCAGCAGCAACAACGAGCACATCAGTAAGCATGAGCATGAGTATGAGTCAA
AGCCATAGTCACGAAGATATAACTTCCAACGAAAACAATAACAATAACAAACATGTAGTT
GATGAGGATGAGGATGATGATGATGATGATCACGAGCACGACGTGGTTATGCCTGGTTTT
CGTTTTCATCCAACTGAAGAAGAACTCGTGGAGTTCTACCTTCGCCGTAAGGTGGAGGGC
AAACGTTTCAATGTTGAGCTTATTACTTTCCTCGATCTCTATCGCTATGACCCTTGGGAA
CTTCCTGCGTTGGCAGCAATTGGAGAGAAGGAATGGTACTTTTATGTGCCAAGAGATAGA
AAGTACAGAAACGGAGATCGTCCGAATCGTGTAACAACATCAGGTTATTGGAAAGCAACA
GGAGCTGATAGGATGATCAGAACTGAAAATTTTCGTTCAATTGGACTTAAGAAAACCCTA
GTTTTCTATTCTGGTAAGGCTCCTAAAGGCATCCGAACCAGTTGGATTATGAACGAGTAT
CGTTTGCCTCAACATGAAACCGAACGTTATCAAAAGGGTGAGATATCGCTATGCCGAGTA
TACAAGAGAGCAGGAGTAGAAGATCATCCCTCCCTCCCTCGTTGCCTACCTATTACAAGA
GGTAATCATTCAGATCATAAGAATAAACAGAATGAAATATTGGGAATGGGATTTGTTGGT
GGACAGTCTAATAAGGCAGCTGCAACGCCAACGCCAACTGCAACTGCATCAATTAACAAC
AAAATGCATGAAGGAAGCTGCAGTGTTGGCAATTCCAATTCGGATCATGTGACAACAGTT
CTTGGTCTTTCCAAATACAGTACTGATCCTAATTACCGTGCAGCGGAGGAGGAGGAGGAG
GAAAGGTTAATGATGATGCAGCAACAACAAGTACAATATTCTGCAGGAGGCAACAGTACT
TTGTTACTCCCTCTCCCTGCAGCTTGTTTCCCTCTCCAAAATTCAGCAGTTAGTTCCAAC
AGTAGTATGATGGATGATCTCAATAGGCTTGTGAGTTTTAATAATAATAATCAACATCAC
TACTGCTACAATCCAAATCCAAATCCAAATCCAAATCATTTGTCTACTTTGCTGATGCAA
CCAGCTACTCTCAACTCTTCAGTACTACCAATTACTCCAATTCCAACCAACTTCTCTGAC
CGGCTATGGGACTGGAATCCAATCCCTGAGGATCACCCAAACCCCTCCTTCAAGTAA
>CaNAC37
ATGGCTAGGAGCTGGCTTATTGACATAGGAGGATTTGCAAAGAAAGTAAAAAGCACTACA
CTATCTTCAGCTGATCAGATTAAGGATTGTGGTGCATATCGCGAATGCCCAAACTGTCAT
TATCGTATAGATAACAGTGATGTTTCTACTGAGTGGCCTGGTTTTCCCCTTGGTATAAAG
TTTGATCCTTCTGATGTAGAACTATTAGAACATTTAGCGGCTAAATGTGGCGTTGGGAAC
ACAAAGCCACACATGTTTATCGAGGAGTTCATCCCGACCTTGGAAGGAAACCAAGGCATT
TGCTATACGCATCCTGAAAATCTTCCAGGTGCTAAGAAAGATGGGAGTAGTGTCCATTTC
TTTCACAGAACAATCAATGCATATAGTACTGGTCAACGAAAGCGTCGGAAGATTCATCAT
CATCGTGGTTTGACTGAAGAGCATGTACGCTGGCACAAGACTGGCAAGACCAAAGCTGTA
TTTGAAGATGGAGTACATAAGGGCTTTAAGAAGATCATGGTTCTGTATATAAGATCTGAG
AAAGAGTCTAAGTCCTACAAATCCAACTGGAAAATGCATCAGTACCATCTAGGGATCAAT
GAAGATGAGAAGAATGGAGAATATGTGGTTTCGAAAATATTTTATAAACAGGTTGAGAAA
AATGAGGAGAAACCATTGGCCGAAGAACCTGACAATGTAACATCGCGGACAAGTCCAACA
ACTCCAAAACCAAATCCTCCAAATCCACCGCGTACTGGAATATGTGTTGAAAATGATGAT
AACATCGATGAAACTGCTCTTTTATTGTTTGCAGAGGATGCAAAGTCTATCCCTGGAGAA
TCACATGCCCCACAATCTGATATTCAGGATCAGGAGAATACACCCAACCCTGCTTGGTTT
GCTGGTGAATCACAGGCTATAGAAAATTCTGAATATGATGGCTTGGATGACATTTTATTA
TGCAAGGAGATATTAGATTCATTTGCTCTATTTGATGATTCTGGATTGGACTCAATCACT
ACCAATGACTTTGATTACTATGAAAACAAAATGACAGGAAATGGTAATGTAACTTCAACT
TCTGTCCTGGATACACTGGAATTGGATACTCCTCCAGATTTTGATCTTTCGAATTTGACA
TTTTGTTCTCAAGACAGTATCCTTGATTGGATGGACAGGTTATGA
>CaNAC38
ATGATGTTAGCAATGGAAGAAGTACTTTGTGAACTTAGTGATCATGAAAACAAAAGAGAG
CAGCAAGGTCTCCCACCAGGTTTCAGATTTCATCCCACTGATGAAGAACTAATAACATTT
TATTTAGCTTCAAAGGTTTTCAATCCAACAAATTTCAGTAGCATTGTGAAGTTTGCAGAA
GTTGATTTGAATAGATGTGAGCCATGGGAACTTCCAGAAGTGGCAAAGATGGGTGAAAGA
GAGTGGTATTTGTTCAGTTTGAGAGATAGAAAATACCCAACTGGACTTAGAACTAACAGA
GCCACTGGTGCTGGTTACTGGAAAGCAACCGGCAAAGATAAGGAGGTTTACGCTGCTGCT
GCTTGCACTGGATCCTTGCTCGGCATGAAGAAAACACTTGTTTTCTACAAAGGTAGGGCC
CCACGCGGTGAAAAGACCAAATGGGTCATGCATGAGTACCGTTTGGGACCTCACTATTCT
CACATTCACACTTGCAAGGAAGAGTGGGTGATATGCAGAATATTTCACAAATCTGTTGAA
AAAAGAAATTCAATAATCCAAGTTGAAGGTGGTTCTTCTAATATATCCCTAAAAAAAGGG
TCTTTATTACCTCCTCCACCTTTACTTCCAAACCCAACTTCATTTTCATTGCAAAATGAC
CAACTCACCCATTCTCATTTTCCATTGCATGCATTCCAAACTTCCTTCCCAATCACTCAT
GATATGTCACAACAAAATTTCACCCTGCAGAAAGAACCCAATATTCCAAAAACAGAGGCT
ACATTCTATGAATTATACCAATCACAATCAATAGATGATGTTGTTAACTTGAGATGGATT
GACCATATTAATAATTTTCAAAGTTCATTCCCTCTTGAGATGAATGATGATGATGAGTTG
ATTGCATTCTCATCAGGAGCTGATTCAAATGCTGAATTTAGGGACATGTCAACTTCAACA
CCCTTTAATAGTAGACTAGCCTTAGATGCTTCTGTTGGAATAGATTCTTGGTCACAGCCC
CAACTTGTCTAG
>CaNAC39
ATGGAAAATGTGAAGTTTATTAAAAATGGAATAAGCAAATTGCCTCCTGGTTTTCGTTTT
CAGCCAACCGACGAAGAGCTTGTCTTTCAATACTTAAAATGTAAAATCTTGTCCTATCAA
TTGCCTGCTTCAATCATTCCTGAGATCAATGTTTGCAACTACGATCCTTCGGATTTGCCA
GGAAATTATGGTGAGCAAGATAGATATTACTTCAGCAGCAAGGAAACAAAGTATCGAAAC
GGAAATCGCATGAATCGAACAACGAAGTCTGGATATTGGAAAGCAACAGGATCAGAGAAG
AAAGTTATAAGAATTTCTTCATCAATAAGTAATAATAATGTTGGTCTTGCAGGGATAAGA
AAAAGTCTTGTGTTTTATAAAGGAAAATCTCCAAATGGATCTCGAAGTGATTGGATTATG
CATGAATATCGCCTAGTCAATGTAGAAAGTAACTCATCCCACCAGAAGTATGTAAAGGAG
ATAGGGGATTGGGTTGTGTGTCGAATATTCATGAAGAAAAGAAGAAATGTAGACAAATAC
AGTGTTTCAATCATGAATCAGCCAAGATTCTTTGATTTTATGAGGGTACACAACGCTGCT
CCGGGGCCTATGATTACATCCTCATCTTCTTCAACTTCCACTGAGGTTTCTTCATCTGAT
CAAACAAGTGGCTATATATGTTGA
>CaNAC40
ATGGCATCAGAGCTTCAATTGCCGCCAGGCTTCAGATTCCATCCAACGGATGAGGAGCTC
GTCATGCACTATCTCTGCCGCAAATGCACTTCGCAACCCATCTCTGTTCCCATCATCGCC
GAAATTGACCTCTATAAGTACGATCCTTGGGATCTTCCTGGCATGGCTTCTTATGGAGAA
AAGGAGTGGTATTTTTTCTCGCCACGAGACAGGAAATATCCGAACGGTTCGAGGCCGAAC
CGGGCGGCTGGATCCGGATATTGGAAGGCAACCGGGGCGGATAAACCCATAGGTCACCCG
AAACCGGTTGGGATTAAGAAAGCGTTGGTGTTTTACGCGGGGAAAGCGCCAAAAGGTGAT
AAAACAAATTGGATTATGCACGAGTATCGTTTGGCTGACGTGGATCGCTCCATTCGAAGA
AAGAACAGCTTAAGGCTGGATGACTGGGTGCTTTGTCGTATTTACAATAAGAAAGGCACA
ATCGAGAAACAACCGAACAGCGGTGTTATAAACAGGAAAACAGACCCCTCGGAAATCGAA
GACAAGAAGCCAGAGATTCTGACACGTGGAAGCGGTCTTCCGCCACACCCTCCACCGCAA
GCGACGGCGGGAATGAGGGATTACATGTATTTCGACACATCAGATTCAATCCCGAAGCTG
CACACGGACTCGAGCTGTTCAGAACACGTGGTGTCGCCGGAGTTTGCAAGCGAGGTGCAA
AGCGAGCCTAAATGGAACGAATGGGAAAAGCACCTTGAATTTCCTTATAATTACGTGGAT
ACCACTCTGAACAGTGGTTTCGGGTCCCAATTCCAGAGCAATAATCAGATGTCCCCGTTG
CAGGATATGTTCATGTACTTGCCAAAAACCTTTTGA
>CaNAC41
ATGGGTTCTATTGACTGTGGTCCATCGCTTGGAGATGATGGGATGGCGGTTTTGTCTCTG
AATTCGCTTCCATTAGGGTTCCGATTCCGACCTACAGACGAGGAACTTATCGATTACTAC
CTAAGACAAAAGATCAACGGAAATGGTGATGAGGTTTGGGTTATCCGAGAGATTGATGTC
TGCAAATGGGAACCATGGGACATGCCTGATTTGTCAGTGATAAGGAACAAGGATCCAGAG
TGGTTCTTTTTCTGTCCACAGGATCGAAAGTATCCAAATGGACATAGATTGAACAGAGCA
ACAACTCATGGGTATTGGAAAGCAACAGGAAAGGATCGTAAAATCAAATCCGGAACCATC
TTGATTGGAATGAAGAAGACTTTAGTTTTCTACAGTGGTCGTGCACCTAAAGGGAAGAGA
ACCAATTGGGTTATGCATGAGTATCGACCCACCCTTAAGGAGCTTGATGGTACCAACCCA
GGACAGAATGCATATGTCCTCTGTCGATTATTTAAGAAAAATGACGAGAGTCTTGAAGTT
TCAAACTGTGGTGAAGTGGAGCAGACTACTTCAGCTCCCATGGCTGCCAATTACTCTCCA
GAAGAAATACAGTCTGATGCAGCTCCTATTGCAGTATCCACATCACAGGTCACAGAAGAT
GACAAGCACCAGAATGTTATCCCTGAGATCTCTGAGGAAACAATATCCAATGTTATAGCC
TCGGTTGATTGCCATAGTGATGGATATGATGCTCATGATATCCAAAATAAACTTGCAGAA
CTAGCTGCACAGGAGGATCAGATGAACTTTGACATATATTATAACCCAAAAGAAGGTCTA
TTAGATGACAGATTATTCTCCCCAGCTCTGGTGCATATGCCCCAAGAATTTCATTACGAA
GCAAACAATGAATCAGATGGTGGTTGTGGGCTCCAATATGGTACAAATGAGATAAATATT
TCAGACTTTTTAAATTCAGATCTTAATTGGGATCAACTTCCGTATGTGGAGTCCGGTTGT
CACCAGCAGATCTTTTCCTTGTTTAATGTTAAGGAGAATGGTTCAGGAAGCGACTCAGAT
GTGGAAGTAGCCAATATGACTTGTATGCCAACTACTTATCCTGAAGAGGCAATTGACAGA
AGGATTCCTTGTGTGACAGCACCAGAATCTCGCAGCACCTTTGACTGCAGTGGTGATGAT
GATAGAAAGAGCAAGGTTGTATTATTACAGAACAATTTCCAGATGGCTTATCCGTCGGAT
GGTAATATTGGCGAAGTGTACAATGTCGTCAATGGTAATATTGGCGAAGTGTACAATGTC
ATCAATGGTTATGAGCAACCAAGAAACTATAATACAGTTATTAGTGGTGAAAATGGAATT
GTAAGAAGGGCCCGACCAGCACAAGATGAACAATGGAAGACATTTTCGATGCAAGGTACT
GCTCAAAGGAGACTTCGTTTGAAAAAGATTGAAGATTGCTCAAATGTGACGGTGAAAGAT
GGGAGTTGTACACAAGAACAACATAATTCGAAACCAATTATTCCAGTGAAAAAAGAAGCT
GCAGAAAGTCGTGCTGCCGATGAAAGTGCTACTTGTACTCATGCATCTAAACAGCAGAAA
GTGTCACTCAAGTCAATTTACAATATAAAGATTTCTCGACGAGTCACAAGTGCAGGTTCT
ATCTTGGGGTTAAGAGACTTTTTATTGCTAGCTAAAGCGCCTTTCAGATCAAAGGCATCG
CCCAAATGCACCTTGTGGTCTTCTGTTTTTGTAGTTTCTGCCTCTGTTCTGGTTTCATTA
GCAGTCTTTACTAACATATGGGGATATATTAAAATTTGA
>CaNAC42
ATGGCGGAAACAAAATTGATTCCAGGGTTTCGATTTCATCCCACTGACGTTGAGCTGGTT
ATGTATTTTCTGAAGAGGAAGGTTATGGGTAGAAAATTCCCTTATGATGTCATTGCTGAA
CTTGACATTTACAAGTATGCTCCATGGGATCTACCAGATAAATCTTTGCTCAAAAGTGGA
GATTTGAAATGGTACTTTTTTAGTCCTACAGGAAAGAAATATTCCACTGGAGGGAGGATG
AATCGGGCGACAGAAATTGGGTACTGGAAGACTACTGGAAAGGATAGATCAATTGAACAT
AAGAATCAAGTCGTGGGGATGATAAGAACATTGGTGTTTCACACTGGCAAATCCCATAAA
GGAGACCGAACCGACTGGGTTATGCATGAATTCAGACTTGAAGACAAGTACCTAACTGAC
AAAGGCATTCCACAGAATTCCTATGTGATTTGTAGGGTATTTCAAAAGGAAGGTCCTGGT
CCCAGGAATGGTGCACAGTATGGAAAACCATTTAATGAGAAAGACTGGGACAGTGAAGAG
GAAGTTGATTGTCCTCAACCTGTCCCTGTTGCTGCTGTCTCTGCACCAGCCCCCATTCTA
CCTAGCTCATGCCATATCTCTGTAGCAAATGACATGCATCCCACGACAAGTGGATGCATT
GGACTGGCCTCTTCATCATATCTATCAAGGGTGATGCCCTCTGGCGTGACACACCCTTCA
GCTCCAAGCAATCAAGTTGATGATGACATTTTATCCATGCTTGCTAGTTTCAAAGATGAT
AACGATACATCAGCCAAGAATGAAAACAATGGATCTGAGAAGGTAGATAATTCTGGTCAG
GCAAACAATGCTGAAGGTGCACCATATTTAGATCCAAATGAGATTTTCGAGAGCTTGGGA
GATCTTGACAGCTTGATTGGATTGGATGAAGGAGACGGCTTTTCATATGGCCAAAAAGAT
GAATATACTAAAAACGAAATGCCTTCTACTAGCAATGTATCTTTGTTTTGCGACCCTCAA
CACGATTTCTTGGAGTTGACTGACCTAGAGGCGCCATTGTTCTAG
>CaNAC43
ATGAAGGGTGAATTAGAGTTACCTCCTGGTTTCAGATTTCACCCCACCGATGAAGAATTG
GTGAACCACTACTTGTGTAGGAAATGTGCTGGTCAATCAATCTCCGTTCCGGTAGTCAAA
GAAATCGATTTGTACAAGTTTGATCCATGGCAGCTTCCGGAAATAGGTTTCCAAAGCGAG
AAAGAATGGTACTTCTTCTCTCCAAGGGACAGGAAATACCCAAACGGTTCTCGGCCGAAC
CGGGCGGCCGGAAGCGGTTATTGGAAAGCTACCGGAGCCGATAAACCGATCGGGAAACCG
AAGGCGATGGGGATTAAAAAAGCACTGGTGTTCTACGCTGGAAAAGCTCCCAAAGGAGTT
AAAACTAATTGGATTATGCATGAATATCGTCTCGCTAATGTTGATAGATCAGCCGGCAAG
AAAAACAACTTGAGGCTTGATGATTGGGTATTGTGTAGAATTTACAACAAGAAAGGGAAG
ATTGAAAAATACAACACGGTAACACCAAAGGTTGATAGTTTTTATGATCATGAAGAACAT
GAGAGGAAGCCAGAAATTGACAAGTTAGGGAATTATCAATTGTACATGGACTCGTCGGAT
TCAATTCCAAGGCTGCATACGGACTCGTGTAGCTCAGGTCACGTGGTTTCACCGGATGTC
ACGTGCGATAAAGAGGTGCAGAGTGAGGTTAAATGGAATGAATTTGGGTTACAGCTGGAT
GACGCGTTTGATTTTGAATTGAATTCTTTGTTGGATACTAGTAACCTTTCGTTGGATCTT
GATGGCCCTTTTGGGACCAATTTTGAGTACCAAATGAACCACCTCTCGCCGTTACAGGAC
ATGTTCATGTACCCAAACAAGCCATTTTGA
>CaNAC44
ATGGCACCTGTTTCATTGCCTCCTGGGTTTAGGTTTCACCCTACCGACGAAGAACTTGTT
TCTTATTATCTCAAAAGAAAGATTAATGGCCGTAGGATTGAGTTGGAGATCATCCCTGAA
GTTGATCTCTACAAGTGTGAACCATGGGACTTGCCAGGGAAGTCATTGCTACCAGGAAAA
GATTTGGAGTGGTATTTTTTCAGCCCTAGAGATAGAAAGTATCCAAATGGTTCAAGAACA
AATAGAGCAACAAAATGTGGATATTGGAAGGCAACTGGTAAAGATAGAAAGGTACAGTCT
GAAACTCGTTCTGTTGGAATGAAGAAAACACTTGTTTACTATAGAGGAAGGGCCCCACAT
GGTACTCGTACTGGTTGGGTTATGCATGAGTATCGTCTTGATGAAAGAGAATGTCAAAAT
CCTTCTTCTGGCTTGCAAGATGCTTATGCTCTTTGTCGTGTCTTCAAGAAGAGTACTGTT
ATTGTTCCTAAACTTGCTCATAATCTCTCAATTACAACTGATCACTCTCAAGGTAGAGGT
GATGTTTTAGATACCTCTAATTATAATTTCATGCCATGTCATTCAACCTCTACTCAAAAC
CTTCATGGTCTTCTCACAAGGGATAATAATTCTACTTGGACACAATTCTTATCTGATGAT
TTACTCAATCTTCCAATGTCTTCTTCTTTTCCCAATTATGCTTCCACACCTTACCCTCCA
TCTAAGGTCGATATAGCACTAGAGTGTGCAAGGATGCAACATAGGTTTTCCATGCCTCCC
TTGGAAGTGGAGGACTTCCCTCAAGTTTCTATTTCTGAGCTCAATTCAATGTGTAGTGGA
AACAGAAATGAAACTGATATTTTGCAAGAAATTCTATCTGTTGCTCAAGCTTCCCAAGAT
TTGATTCATCAATCAAACTACTCTCATCCATTTGGTGGCAATCAAAATGATTTTACTTTT
ATGGTTGGAAATAATTATAATCATGTTAATGATCATATGAGTTCCATGAGATATGATGAC
AAAGCATGGGAAGATCCAAACACAAGATCAATTGAGATTGGAGATCTTGATGATGAATTC
AAGGCAGAGAGGATGGTAGAGAATTTAAGATGGGTTGGAATGTCAAGCAATGATTTAGAG
AAGAGTTTCATGGAAGAGCATCAAAAAGTTGTTCCAATTGAGGATATTTCAAGCTTCCAA
ACAAATAGGAAAGAGAATGAGGTGCAAGTAGAATCTGAGCAACAAAATATCAACAAAGAA
CTCAATGACAATGACATTGAAAATTTCTCAATGGGATTTATCAATGATGATGACCCTAAT
GAGAATTTTATAAATGAAGGTAACATTGATTATTCAAATTCTACAAGCTATGAAGTTGTT
GAGGAAACAAAAATTAGTCATGGAATGTTTGTTGCTACACGCCAAGTAGCCGACACATTT
TTTCACAAAATAACTCCTTCACAAACAATCAAAGTTCAACTTAATCCAATTATGGAAAAT
AAACAATCTATAGAGAATAAAGAGATCACATTGATTATACCAAAAAATCAAGGGAACTCT
CTCTTAAGGAAATTTAAGGCAAATTTTATAGGGTATATGAAAAAACCAACAAAAACAATG
GTAAATGCTATTGTGTTCATATTTGCACTTTTTTTGGTGCTTTGTGTTTATTTGAAGGAG
CAAGTAGAAGATTGGAAACCAAAACCAGAGTATGTGAAAAGGAAAAATTGCTATGAAGCT
AGTAATAGCATGAAGAGAGTGATCAATTGGAATGAGCAAGAAAAAATTTGGTTTATTGGT
ATCAAAAGTGGTAAAGGTTTTGATGTGGTTTTGAAGAAGATAGGAATTTTCCTTACCATA
TCCTTGGCTATTTGTACTATGTGGGTTAACCACATAATAGCTAGCCCTTGA
>CaNAC45
ATGATGAATAAGATGAGCAACGTAACTTGCTCTGATCTAATAGATGCAAAGCTTGAAGAA
CATCAATTGTGTGGATCCAAACAGTGCCCTGGTTGTGGACACAAGTTTGATCAAGGTGGC
AAGCCGGATTGGCTAGGTCTACCAGCAGGAGTGAAATTTGATCCAACAGATCAAGAACTC
ATTGAACATCTTGAAGCCAAAGTTGAGTCCAAAAATAATATCAAATCACACCCTTTGATT
GATGAATTCATTCTCACTATTGAAGGAGAAGATGGTATTTGTTACACCCATCCTGAAAAA
CTCCCAGGTGTGACAAGAGATGGATTAAGCAGACACTTTTTCCATAGACCATCAAAGGCA
TATACAACAGGAACAAGAAAAAGGAGAAAAATTCAAACAGAAGAATGTGACATACAAGGA
AATACAGGAGGAGAAACAAGATGGCACAAAACTGGTAAAACAAGACCTGTTATGGTGAAT
GGAAAACAAAAAGGTTGTAAGAAAATTCTAGTCCTCTACACTAATTTCGGGAAGAATCGA
AAACCTGAAAAGACGAACTGGGTGATGCATCAATACCATTTAGGACAACATGAAGAGGAA
AAAGAAGGTGAACTTGTTGTGTCAAAGATATTCTATCAGACTCAACCAAGACAGTGTAAT
TGGTCTGATCATAAAAGTGTTACAAATATTAATGGTGAAGCAATTGAAGGTAGAAGAGAT
AGTGGAAGTGGAAGTTGTTCTAATTCTTCTAAGGAAATTGTTCATCACATTAATCATAAT
CATAGAGATGAAATGTCTGCTGTTCCAACTCCTTTAACAAATTTCACTTCTTCCTTGGAT
ATTCAACACCTTAAAAATGATCATTTTGGATTCATTCCTTTTCGAAAAAGCTTCGATGAG
GTTGGAATAGGAGAAAGTTGTAGAGGAAGAGAAATTCAACAAGCATCAGGAAGATGTGAT
GAACATGAACATGAGCAGATTAATGCAACCACATCTTTCCATATGAGTAGGCCTTCCAAT
CCAATCTCAACTATCATATCTCCACCACCTCTCCACCACACTTCCATCATTCTTGATGAC
AATTCTTACCATGTCTCAACAATAATGCTCCAAAATGATCATTTCCAGCAGCAGCAGCAG
CAGCATAAAATAGGTGGAAGTGGAAGGTCTGCTTCTTGTTTGGAGGAAGTCATTATGGGA
TGCACATCATCTTCTTCTGATATCAAAGAGGTACTTTTGCATAAAGAAAACACAATCATC
TATCTATTTTTGACTATATCATGTGGAAAAAGAGAAAGAGAAAGAGAAAGAGAAAGAGAA
GGGACACTGAATTTCCAATATTGCATTGTTTTCTGTGTCATGATGAATGAATGA
>CaNAC46
ATGGAAAAATTGAATTTTATAAAAAATGGAGTGAGTAGATTGCCACCTGGTTTTCGTTTC
CAACCAACAGATGAAGAGCTTGTTTTTCAGTATTTGAAATGTAAGATCTTCTCATGTCCC
TTGCCTGCTTCCATCATTCCTGAGATCAATGTATGCAAGTATGATCCTTGGGATTTACCA
GGAGGTTGTGATGAACAAGAGAGACACTTTTTCAGCTGGAAGGAAGCTAAATATCGAAAT
AGTAAACGCATGATGAGCAGAACAACCAAATGTGGGTATTGGAAGGCAACAGGGTCAGAC
AAAAAAATTTCATCACCAACTTGTAATGGCATTGTTGGCCTAAGAAAAACTCTTGTTTTC
TATGAAGGAAAATCCCCAAATGGTTCTAGAACTGATTGGATCTTGCATGAATATCGTCTC
ATCAATGTAGATACTAGTCCTTGCAACTCAACCCAGAATTACTATGGAAATGAGATAGGA
GATTGGGTTTTGTGTCGCTTATCAATGAGGAAAAAAAGTTTAGAAAGTGAATATGGAAGC
ACAAGTACTCATCATGCTCCTTCAAAATTAATGTTTGATTTTATGATGGTAAGTAACAAG
ACATGTTCTTCTACGTCCTCTTCATGTTCAAGTTCCAGTATTAACAACATCGAGGTCTCT
TCAAATGCACCAGATCATCAACAAGATTATACTCATTTTTAA
>CaNAC47
ATGCAAGGTGCTTTAGACTTACCACCTGGCTTCAGATTTCATCCCACTGATGAAGAACTT
GTCAATCACTACTTATGTAGAAAATGTTCTTCTCAACCCATCGCTGTTCCCATTATCAAA
GAAATCGATTTGTATAAATTTGACCCATGGCACCTACCCGAAATGGCACTTTACGGTGAG
AAAGAATGGTATTTTTTTTCTCCAAGGGACCGTAAATATCCAAACGGTTCAAGACCGAAC
CGGGCTGCGGGAACCGGTTATTGGAAAGCTACTGGAGCCGATAAGCCGATTGGAAAGCCG
AAGCCGCTTGGGATAAAGAAAGCACTGGTGTTCTACGCTGGCAAAGCTCCTAAAGGAGTT
AAAACCAATTGGATCATGCACGAGTATCGCCTTGCCAACGTTGATAGAACCGCATCCAAA
AATAATCACAACTTGAGACTTGATGATTGGGTTTTGTGTCGAATTTACAACAAGAAAGGG
AAGATTGAGAAATACAACAGCGTCAACAAAGTATCAATGTTTTCTGAGGATGTTCACTTT
GAGAATGAGAAGAAGCCTCAGATCAAGATGAACGGCCAGGATGATTTCAGGATTAATGAT
CACACGGACACGTCGGATTCGGTGCCACGTTTTCACACGGATTCAAGCTGTTCGGAGCAC
GTGGTTTCGCCGGATGTCACGTGCGAAAAGGAGGTCCAAAGCGAGCCCAAGTGGAACGAA
TTTGTTTTGGGCCCGGACCCAGTTTCGGCCTTTGATTTTCAGTTGAATTTTATGGACGAT
GGAGAAGATGACCCTTTTGCCCCTAATGCTCAGTACCAAATGAATCAACTCTCGGGTTGG
CAGGATTTGTTAATGTACCTACCCAAGTGA
>CaNAC48
ATGTTGGGGAGTGAAAATATGAAGCTTCCACCTGGGTTTTACTTTTCTCCAACGGATGAA
GAACTTGTTCTTCATTTTCTATATTCTAAGGCTTCTAATTTACCATATCATCCTAACATC
ATACCTCATCTTCATTTGTCTCATATTGATCCTTGGGAACTATACGGTAAAGCGTTATCA
AGTGGAAATGAACACTACTTGTTCACGGAAGTAAAGGAAAGTAGATCAAATGAAAATGGA
TACTGGAAAGAAATAGGGGCTACAAAAGCTATAGTTTCAGCTGCTAATAATATATTGGGG
ATGAAGAAGTATCTTGTGTTCACTCTTAGGGAAGGAACACAAACCAATTGGATAATGGAA
GAGTATCATATTTCTTCATCCACATCTCCAATTAATCTTGAAGAGAGTTGGAGCAAATGG
GTTTTATGCAAAGTGTATGAAAAGAAGATGTCACAAATGTCCCAACAAGTTTGTTATAGC
GATGAGGATGTTGACAGTGGAACAGAGGTGTCATGGTTAGATGAAGTTTTCATGTCCTTA
GATGATGATCTTGATGAGACAAGCCAACCTAATTAA
>CaNAC49
ATGGGAGATAATAATAACAATGTCAACCTTCCACCAGGTTTTCGTTTTTATCCAACAGAT
GAAGAGCTTCTTGTCCATTTTCTTCATAGAAAGGCTTCCCTTTTACCTTGTCATCCAGAT
GTTATCCCTGATCTTGATCTCTTCCCTTATGATCCTTGGGAACTTCATGGTAGAGCTTTA
GAAGAGGGAAATCAATGGTACTATTATAGTAGAAGGACACAAAACAGAATCACTAACAAT
GGTTATTGGATGCCAATGGGAATGGAAGAACAAGTTGTTACAACCTCAACCAATAAGAGA
CTTGGTATCAAGAAATATTATGTTTTCCATTTGGGACAGACACCTAATGGTAACAAAACC
AATTGGATAATGCAAGAGTATCGTCTATCAGATTCTGCCTCCTCTAGCAGATCATCATCA
TCTAAAAGAAAATCACAACCAAAATCAGAACATAGTAGGTGGGTGATATGTCGAGTTTAT
GAGAGTGATGATGACGAAGATGGTGATGGAACAGAGCTTTCTTGTTTGGATGAAGTTTTC
TTGTCATTGGATGATCTTGATGAAGTAAGCTTGCCAAATTAG
>CaNAC50
ATGGACAGTACAGATTCATCATCTTGCTCTCCGCACCCCCACCTCCCACCAGGTTTTCGA
TTTCACCCCACCGATGAAGAACTTGTCGTTCACTACCTCAAAAGAAAAGCTGCTTCTGCA
CCCCTTCCAGTAGCCATCATAGCTGAAATTGATCTCTACAAGTTCGATCCTTGGGAACTA
CCAAGTAAAGCAAGTTTTGGGGAACAAGAGTGGTACTTTTTCAGCCCAAGGGATAGGAAA
TACCCAAATGGGGCAAGGCCCAATAGGGCTGCTACTTCTGGGTATTGGAAAGCTACTGGA
ACTGATAAGCCTATATTAACAACTGATGGGCACATGAAAGTTGGAGTTAAGAAAGCACTT
GTTTTTTATGGTGGGAAGCCACCAAAAGGAGTTAAAACTAATTGGATTATGCATGAATAT
AGGCTTATCACTGATCACAATCATAATATTCATTCCTATAATGCAACCTCAAAAACTCCT
CCTCTGCCTGCTGATCCTCCAAACCTTAACAAGAAGAATTCCCTCAGGCTTGATGATTGG
GTTTTGTGCCGAATATACAAAAAAAGCAACAGTAGCACAATGCCAAGACCACCTCTAATG
GATCAATATGATAAGGAGCTATCAATGGATCATCATCACACAATGCTACCACTGACTAAT
ATGCAACAGAACAACACTAAACTTCCATCTTCAAGAAGCACAAGTAGTTATGGACTTGAA
AATGATGACAACTTCTTCGATGGAATCTTAGCAGCTGATCAACATCAACATCAACATCAT
CATGAAGAAATGCAAAATGGTTGTGGTTCTCATGACATAAACTCAAAGAATGATAACAAT
GACTCATTCCCCATGAAACGTGCATTGACTGCATCATCACAATTTTGGAATGAAACAGGG
TCACCAGGGTCATCTTCTTCTAGTAAGCGATTCCATGGAGATCTTAATAGTGGAAATAGC
AATGCTGAGGAAAATAATTCATTTGTTTCACTGCTTAGTCAGCTTCCAACAACCACAACT
TTTCATCCAAATGCGATTCTTGGGGATGCTGTAATCAGGCAACAATTTCAACTTCCGAAT
ATAAATTGGAACTGA
>CaNAC51
ATGACATGGTGCAATGACTCAGATGATCAAGATAGAGGCATTCAACTAATAACTTCCACT
TTTATTCGTAGAATTGTTAGCAATGAAACTGATCTTGTTACTCATGACACAAAATTACCA
ACTCAAATTCGAACCTTAACTTGCCCCTCATGTGGTCATAACATTCAATTCCAAGATCAG
GGTGGAATAAATGATTTGCCGGGGTTACCAGCTGGAGTGAAGTTTGATCCGAATGATCAA
GAGATACTACAACATTTGGAAGCAAAGATTATGTTTGATGTGCCTAAACTTCATCCTCTT
ATTGATGAGTTCATACCAACACTTGAAGGAGAGAATGGAATTTGTTATACACATCCAGAA
AAGCTACCAGGTGTAAGCAAAGATGGACAAATCCGTCATTTCTTTCACCGGCCTTCAAAA
GCTTACACAACAGGAACAAGGAAAAGAAGAAAGGTTCAAACCGATGAAGAAGGAAGTGAA
ACAAGATGGCACAAAACAGGGAAAACAAGACCAATTTTTATTAGTGGTGTTATGAAAGGT
TTCAAAAAGATACTAGTCCTTTATACTAACTATGGTAGACAAAAGAAGCCTGAAAAAACT
AATTGGGTAATGCATCAATACCACCTTGGCAATAATGAAGAAGAGAAAGATGGAGAATTA
GTTGTTTCAAAAGTTTTCTACCAAACACAACCAAGACAATGTGGTAATAGTAATTCCATT
ATGAAGGATACTTATGAAAATAGAATGAGTGAAAGAAATGTCCAAGATGATGACAATATA
GTATCTAAAAATGTGGTTCCTACTATGGATTACTATAATTGTGATCCTTTCATGAATTAT
GAACATGTTGGTCATAATTTGGAAAGCTCACCACAACTTATTTCGAACTTGGTTATGCAA
GGTGATGATGGCTCTTCTTTTATTCGATTAGCAATGGATGCAAACAAAGCCAGGTTGGAC
AGAAATTAG
>CaNAC52
ATGGAGAGCAATACAAGCTCTGAACTCCCTCCTGGCTTTAGATTTCATCCAACAGATGAA
GAATTAATTGTTTATTACCTTGGTAATCAAGCTACATCAAAGCCATGCCCTGCATCTATC
ATTCCAGAAGTTGATATCTATAAATTTGATCCTTGGGAATTGCCTGGTATGTTAGAGAAT
GAATGGTATTTCTTTAGTCCAAGAGAAAGAAAGTACCCAAATGGAGTGAGGCCTAATAGA
GCAACTTTGTCTGGATATTGGAAGGCTACTGGCACAGACAAACCAATCAATAGTGGATCA
AAGCATATTGGGGTGAAGAAATCTTTGGTCTTTTACAAGGGTAGACCACCAAAGGGTATC
AAAACTAATTGGATTATGCACGAGTACAGATTGGTTGGATCACAAAAACAAACTAGCAAG
CATATTGGATCCATGAGGCTAGATGACTGGGTTTTGTGTAGAATCTATAAGAAGAAGCAC
ATGGGAAAAACATTGCAGCAAAATGAGGACTATCCAACACTTCAATTTACTGATTCTACA
ATAGTATCAAATAATGATGGGGAACAAGAAACCATGAACCTTCCAAGGACTTGTTCACTT
ACTTATCTTTTGGATATGAATTACTTTGGTCCAATCTTATCTGATGGCTCAACCTTTGAT
TTTCAAATCAACAATTCAAATATTGGAATAGACCCTTTTGTAAAACCTCAACCGGTGGAA
ATGACTAACCATTTTTATGAAGCAGATTCAAGGAAGTACTAA
>CaNAC53
ATGAGTGAAGAAATGACTCTATGCAGTGACATTCAAAACAATGATCATAGTGTAACACTG
GAGGGACGAACGGATAGCTTAATTAGAACATGTCTCACATGTGGTCATCATATCAAATGC
CAAGATCAGGGTGGTGGAATTAATGACTTACCTGGATTGCCTGCTGGAGTGAAGTTTGAT
CCAACAGATCAAGAGATACTTGAACATTTGGAAGCGAAGGTGCGGTCTGATATTCATAAG
CTTCATCCTCTAATTGATGAGTTCATACCTACTCTTGAAGGAGAGAATGGAATTTGCTAT
ACTCATCCAGAAAAATTGCCAGGAGTTAGCAAAGATGGTCTGATCCGTCATTTCTTTCAC
CGACCTTCGAAAGCATACACAACAGGAACAAGAAAAAGAAGAAAAGTACATTCAGATGAA
GATGGTAGCGAAACACGTTGGCACAAAACAGGTAAAACAAGACCAGTCTACAACAATTCC
AAGTTAAAAGGCTACAAAAAGATCCTCGTACTTTACACTAACTATGGAAAACTAAGAAAG
CCAGAGAAAACAAATTGGGTGATGCATCAATACCATCTTGGTAGTAATGAAGAAGAGAAA
GAAGGAGAGTTAGTTGTTTCCAAAGTTTTCTATCAAACACAACCAAGACAATGTGGTGGT
GGTTCATTGATTAAAGACTCTGTTTCTGAAAAAACTATCAAGGGTCAAAATGGGAATCAA
GTGGTAATTAATGGTAAAAATAGTACTAATGGATTTCTTGACTACTATCGTTCAAATTTC
ATTTCTTTTGATCAAGGAAATCAACATAGAGATACTAATGCTCAAGTGATTAATCATTTT
CCTGTTCTTGAAGGTGCTCCTAATTTCAATATTCCTTGA
>CaNAC54
ATGGCATCAATGGAAGACATCATGATGAGTACCGAGGATATTACACTACCAGGATTTCGA
TTTCACCCCACAGAAGAAGAACTACTTGATTTCTATCTTAAAAATATGGTTGTTGGAAAG
AAACTTCGCTTCGATGTCATTGGTTTCCTCAACATCTATCACCATGATCCTCGCGAATTG
CCAGATCTGGCAAAGGTTGGAGAAAGAGAGTGGTATTTTTTCGTGCCAAGGGACAAAAAG
CATGGTAGTGGAGGAAGGCCTAACCGTACAACTGAAAAGGGGTTCTGGAAAGCCACCGGT
TCAGACCGGAAAATCGTGACCTTATCTGACCCGAAGCGCATAATCGGGTTGAGGAAGACC
TTGGTTTTTTATGAGGGAAGAGCTCCACGTGGATGCAAAACCGATTGGGTCATGAATGAA
TACCGTTTACCTGACAATAGCCCCTTGCCTAAGGACATAGTGTTATGCAAGATATATAGA
AAGGCAACTTCATTGAAAGTGCTAGAACAAAGGGCAGCAGAAGAGGAAGAAATGAAACAA
ATGGTGGGTTCCCCTGCATCCCCTCCTTCCTCTACAGACACAATCTCCTTCAGCTGCATA
CAACAACAAGACCAACACGTGTCCCTTCCCATGTTGTTTCTTCCTAAGAAAGAATCTGAA
GCTGAAACTGAAGACATGGTTTCTCTGTCTGTGTCAACACCAAGTCATGAAAAAAGTACA
AAGAACCAAATGAATGGTATTGTGAAAGATAATAACAAAAAGGGTATTTGTGGAACATCG
TTGCAATTGCCCTTTGGAAAGGACAATGTGCCTGAGCTTCAGTTACCTATAGCAACGGAT
TGGACCCAAGATACTTTTTGGGCTCAGTTTAATAGTCCTTGGCTGCAAAACTGGACTGCT
AATTCCAACATCCTCAATTTTTAA
>CaNAC55
ATGGTAGAGCATATCCCAACTGGGTATCGCTTCTTCCCTACAGAAGAAGAACTTGTTGGC
TTTTACCTAAACAAAAAGCTACAAGGAGAAGTAAATGATATAGATAAAGTTATTCCTGTT
ATTGACATCAATGGTGTAGAGCCATGGAACCTCCCAAGTCTTGCGGGAGAGCTTTGCCGC
GATGAAAAAGAGCAATGGTTTTTCTTTTCGCCAGGACAAGAGAGAGAAGCTAGGGGAGGG
AGACCTAATAGAACAACAGCTTGTGGATATTGGAAGGCAACAGGTTCTCCTGGCTATGTT
TACTCTTCTGATAACAAAGTTATTGGAGTGAAGAAAAGCATGGTGTTCTATAAAGGAAAA
GCTCCTAGTGGAAACAAAACTAAATGGAAAATGAATGAATACAGAGCCATTCAAATTTCT
AACCAATCCAACATTGCCACCCCACAGTTAAGACGGGAATTCAGCTTGTGTCGAGTGTAT
GTGATATCGGGAAGCTTTCGAGCATTTGATAGACGCCCATTAGAGAAGGAAAGAGTTTAT
GAATTGCAAGTTCGTGATATTGATCAGAACCAATTTGGTGCCACGTGTACTCATAATCAA
GCTGCAAAAATGGATGCATTAAGTTCATTTGAAATTTCCCAATTTGAGGGACTCCATAGT
ACTCATATGCTTGAGGATGTTGGAGGTTCAAGTAGCACTAATTGGACTTTAAATAACAAT
GATAATGATAATGATAATGATAATGATAATGATAATGATGAGCTTCTACTTCAAGAACCA
CTATGGGAATGGGAATGTGAAAATTTTAAATGGCCCTAA
>CaNAC56
ATGGGTTCTTCTAATAATGGTGGTGTGCCACCAGGATTTAGATTTCATCCAACTGATGAA
GAGTTACTTCATTACTACTTGAAGAAGAAGGTTTCCTTTCAGAAATTTGATATGGATGTT
ATAAGAGAGGTGGACTTGAACAAGATGGAACCTTGGGACTTGCAAGAAAAATGTAAGATT
GGGTCAACTCCACAAAACGAGTGGTACTTCTTCAGTCACAAAGACAGAAAGTACCCTACA
GGTTCAAGGACTAATAGAGCAACAAATGCAGGGTTTTGGAAAGCCACAGGAAGAGATAAA
TGCATTAGGAATACATACAAGAAGATTGGAATGAGAAAGACACTTGTGTTCTACAAAGGC
AGAGCACCTCATGGACAAAAGACTGATTGGATTATGCATGAATATCGCCTTGAAGATGCC
AATGATCCTACCAATGAAGAAGGATGGGTGGTGTGCAGGGTGTTCAAGAAGAAGAACTTA
TTCAAGATTGGGAGTGAAGGTGTATCTACACACAATCACCAAGAACAACAACAGATGAAC
ATTAACATTTCCTCAGGAACCAATCCTCGTTCCTTCATGCATAGAGAAAACCAGTACTTA
CTACATCACCAACAACAGCAAAATCACTCAGCTGGGTTTGAGCATGAAAAACCTGAACTT
AGTCTTCACTATCAACACTTGCAACAAAACTCTCAATACTCATCACTTTTTCAATCCCAA
TCTCTTCTTCATGCCCAAAAACCTCTAGAGGTTAATTTTGACTACTCATATGCATCATCA
TCTTTACATTCAGAACAACCAATCACAGTCAAACAACTGATGACAAATCCTAGAGACTGT
GAAAGTGGGAGTGATGGATTGAGATACCAAGTTTCAGAATCTGGCATTGAAGTTGGATCA
TGTGAACCACCAAGGAGTGGTGGTGATGGAATGAATGAATGGGGTATGCTTGATAGATTG
GTGAATGAAGATTCAACAAAATTAGGGGGAAGTAGGTTTGAAGATGCAAATAATCATCAA
ATCAACCAACTTTCTTTGCGAGGTGAGATGGATATTTGGGGCTATGGAAAACAATGA
>CaNAC57
ATGAGGTTACCTTACATTCCACGTTTCTTCCTCCCCAAAACACCACTATTTATGCCCTTC
TTTTCCTCTCTTTTTTCCCTTCTCAATCTCAACACAACAACCACCACCTTCACTTTCTCA
TGTTTTCTAACTCTTATCTCCCTCCATTTCTTCTCTTTTTTTCATACATCACTAACACCT
TTTCTCTTCTTTTCTCTTCATTTTATTGAGCTTTTAAGGTTGACCCTTGAAATTATGGAA
AACGTTTCTGTTTTATCATGTAAAGAAGATGAGAAGATGGATTTGCCTCCTGGATTTCGA
TTTCATCCAACTGATGAAGAGCTTATAAGTCATTATTTATACAAAAAGGTTATTGATTCT
AATTTCTCTGCAAGAGCAATTGGTGATGTAGACCTTAACAAGTCTGAACCTTGGGATTTG
CCATGGAAAGCAAAAATGGGAGAAAAGGAATGGTACTTTTTCTGTGTGAGAGACAGAAAA
TACCCAACAGGGTTGAGGACAAATAGAGCAACAGAAGCAGGGTATTGGAAAGCTACTGGG
AAAGATAAAGAGATTTTCAGAGGGAAATCGTTGGTTGGAATGAAGAAAACTCTTGTTTTT
TACAAAGGAAGAGCACCTAAAGGAGAGAAAAGTAATTGGGTTATGCATGAATATAGACTT
GAGGGTAAATTCTCTGTTCACAATCTTCCTAAAGCTGCAAAGAATGAGTGGGTTATTTGT
AGGGTGTTTCAGAAGAGTTCAGCTGGCAAAAAAACACATATTTCTGGGATAATGAGGTTG
GACACTCTTGGTAACGATTTGGGTTCTTCTGTTTTACCACCCCTTACTGATTCATCTCAT
TCTATTGGGAAAATCAAACAATTGAATGATTCAGCTTACGTGCCCTGCTTCTCCAATTCA
ATTGATGTTCAAAGAAACCAAGGAGGGATCTTTGATTCTTTCACCAACAACAACTCAATT
TATGGTGTTTCTTCAAATCCACTAATATCAACTTCTTCAAATCCACTATACTCTAATAAT
AATCAAGTTGGGTGTAATTTGCAATTTCCTAGTTCTGTTTGTGGTATGCAGGACCAAGCA
ATCCTAAGAGCTTTGTATGAAAACAATGGTTTCAAAAGTGAGAGACAGCAAATTGTGAGT
GTCTCTAAGGAAACGGATTTAACTACTGATATGAACGCTGAAACATCTTCTGTTGTGTCA
AATTTTGATATGAGTAGAAGGGCTTTTGAGAATAATCACCATCGTCCACCACCTGCTGCA
GTTGATTTGGATGGTACTTTGTGGAATTACTAA
>CaNAC58
ATGGGAGAAGCATTATTGCCACCAGGTTTTCGTTTCCATCCAACTGATGAAGAACTAGTA
GGATACTACCTTAAAAGAAAAGTGGAAGGACTTGAAATTGAGCTTCAAGTTATTCCAGTA
ATTAATTTTTACAAATTTGATCCATGGGAGTTGCCTGAGAAATCATTTTTGCCAAAAGGA
GATTCAGAATGGTTTTTTTATTGCCCGCGCGATCGAAAGCACCCAAATGGATCAAGAACA
AATAGAGCTACCAAAGCTGGCTACTGGAAAGTCACTGGAAAAGAGAGAAAGGTGGTGTCC
CAATGTACTTCATCCACTATCACTGGTAGCCGCAAAACACTTGTTTTCTATCTTGGTAGG
GCGCCTTTAGGCGATAGAACTAACTGGATCATGCATGAGTATCGCCTCACCGATGATTTA
GTTCAACACTCCTCATTTTTGAAGGGTGGTTTGGCTTTGTGCCGAGTTATTAAAAAGAAT
GAGAAGAGCAAGAGGGCTGCAACAAGTTTGGTTAATAGAAATGAGATCTCAATGAGATTC
TCAAGTGAGCCCTTTTGCAAATCTGGTGATGTTTCTTCTCAAGCAAGTCACCTGAATAAT
GAGAGTGGATATTCAAGTCCTGTTACTTCTCCACAAAATGTGGCTCCAATTGCTGAGTTT
AACCATGTTTCCAAAGAAACTAATCCTTCAAACTTCTGGATCTCCTCTGATATGATTCTT
GATTCTTCAAAGGAGTTTACTCAAGTAAAAGATGTAGTGTCTCAATATTTTCCTAGGTGT
GATTCACCAAGGCAATCAGAACATACAACAATTTCACCTAGTTTATCTTACTCAAATTTC
AACAGTGAAATTGAATTTGTTTATAATCCAAGTCAAATTGGCTACATGTCACCTTACTCA
AATCAAGTGAATTTAATGGACAATTATGGAAATTGGAATGTTCCTTATGAGGGTTACGAT
AAACTTAATTTAGTCTCATATCAAGAGCCTTTCTAA
>CaNAC59
ATGAAGGAGTCAGTTGTCCCACCTGAATTTCGGTTTCATCCAACAGATGGGGAGCTTGTT
GATTATTATTTGAGAAAGAAAGTAGCTTCTCAGAATATTGATCTTGATGTTATCAAAGAC
ATTGATCTATATCGTATTGAACCATGGGATCTCCAAGAGAGATGCAAAATTGGGAATGAG
GAGCAACATGAGTGGTATTTTTTTAGTCACAAAGATAAGAAATATCCAACGGGGACGAGA
ACCAATAGAGCTACAATGGCAGGGTTTTGGAAAGCAACAGGAAGAGATAAGTCAGTGTAT
GAAAGAACAAAATTAATTGGCATGAGGAAGACCTTAGTTTTCTATAAAGGTAGAGCTCCT
AATGGACACAAAACTGATTGGATCATGCATGAGTATAGGCTTCAAACACTTCAAAATGCA
CCTCCACAGGAGGAAGGGTGGGTTGTGTGTAAAGCATTCAAGAAAAAAACCAATGTCCAA
ACAAAGACTAATGAAAGATGGGATCCAAGCAACTTATATGATGATGAAGAAGTAAGTGGC
ATCATCTCAAGGGTGGACCCCATTGACCTTATCATAAGGCAGCCTCAGAGGATTTCAGCT
CAAAATTTCTTGTACAAGCAAGAAATAGAACCAGAAGCAAATAACTTAGCCTTCATGATG
CATTCAGACCAATTATTAGTACCTCTTCCTCAGCTAGAAAGTCCCTCTTTGCAATCAAAA
AGACAAAATTCGATGTCAATAATATCAGAAAATAATAACAATGATGATAGTTTATATTCC
AAAATCAAGAGCAAAGAGAAAGTGACTGATTGGAGGGATCTTGACAAGTTTGTGGCTTCT
CAGCTGAGTCAAGAAGATAGGTGCCATGATCATACAAGCTCAGACATGGCATTGTTGCTA
TTGCAAAGTAGTAGGAATGAAGAAGAGAACAAGTTTAGTTCATTTTTTACTACAAGCCCT
GACTGTGACTTTGGGATATGTGTATTTGAAAAATACATTAATGAATAA
>CaNAC60
ATGTACTTTTTTACTCGAAGGAGTAAGAAATATGAGAATGGACAACGTCCTGATCGAGCT
GTTGAAAATCGTGGCTTTTGGAAGGCTACTGGAAAAGAAAATTCAGTGACCAATAACGAT
ATCAAAATTGGATTCAAAAGAACTTTAGTCTTTTACACAGGTAAACAAGGAAAATCTACT
GATTCAAAACAAATCAATTGGAAAACCAACTGGATTATGCAAGAGTTCACTTCAACTACA
ACTTGTAATACGGACGATTGGGTTTTATGCAAAATTTATGAGCATCAATATAGAAAGAAA
TGTCAAATTACAATCCAAAATAACCAAAATGTTATAGTATCCACCAATATAGATGATACT
TCACCAAATCAATCCAATCAACATTTTCAAGTCCAACAAATGCAAGCTTCTTTGTCATAT
GACATGGATTTCACACCACAATATCAACTTAGTCAACATTTTCAAACTCAACAGATGCAA
GCTTCTTTGTTATGTAACATGGATTTCACACCACAATGTCAACTTAATCAACATTTTCAA
GCTCAAGAGATGCAAATTTCTTTGTCATCTAATATAGATTTCATGCCACAATATCAACAT
AATCAACATTTTCAAACTCAACAGATTCAAGCTTCTTTGCCAACTGAGATAGATTTCACG
CCAAAATATCAAGTCAATCAACATTTTCAAGTTCAACAGATGCAAACTCCTTTGTCATCT
AACATGAATTTCACATCACAATATCAACTTAATCAATATTTCCAGGCTCAACAAATGCAA
GATTCTTTGTCGACAGACATGGCTTCCATGCCACAATATCAACCTAATCAACATTCTCAA
GCTCAAACCGACGAAGAGTATGATGATCCATTTGAGCTTATAGACTTTGATAGATAA
>CaNAC61
ATGAACAATTTCTCACACGTTCCTCCTGGATTTCGTTTCCATCCCACTGATGAAGAACTT
GTTGATCACTACCTTAGGAAAAAGATAGCTTCTAAAAGGATTGATCTAGATATTATAAAA
GATGTTGATCTCTATAAAATTGAACCATGGGATCTACAAGAATTATGCAAAATAGGAAGT
GATGAACAAAGTGAATGGTATTTCTTCAGTCATAAAGATAAGAAGTATCCAACTAGCAGT
CGTACAAATAGAGCTACAAAAGCAGGATTCTGGAAAGCAACAGGAAGAGACAAGGCAATT
TACTTAAAGCATTGTCTGATTGGAATGAGAAAAACTCTAGTTTTCTACAAAGGAAGAGCC
CCTAATGGCCAAAAATCTGATTGGATCATGCATGAGTATCGCTTAGAAACTAATCAAAAT
GGAACTACTCAGGAAGAAGGATGGGCTGTGTGTAAAGTGTTCAAGAAACGAATAGTTACA
ACAATGAGGAAAATGGAAGATTCCCCCTGTTGGTATGATGATCAGGTATCATTGATACAA
GAGCTTGAATCCCCAAACAGAGTTTCTCACCCTTATTATGCATCATACCAACAGAACTAC
CCTTGCAAACAGGAGTTGGATCAATTACAATACATTAATATACTCAATGATGCTAATTTC
CTCCAACTTCCACAACTAGAAAGCCCGAAAGTTCCTTTCCAGTGCTCATCATCACATAAT
TCACTCATACAAGAACAACACATACAAGCACAACAACAACATTGCCAGCAACAAAATATG
CAACTCTTTTCTGGTCGCAATGATGTTCAAGATTGGCGACTATTAGACAAATTTGTAGCT
TCTCAACTAAGTCGCGATATTCAAGATGCTTCCAAGGAAACTAGTAGTTATTGCAATGTG
GATGAACAAATTGCTAATTTGCTAGAAAATGATGAATCCAAAAAATCGGAAACTGGTCAG
GAATATGCGACTTCAACCTCCAACTCCAGTTGCCAGATTGACATGTGGAAGTGA
>CaNAC62
ATGGGAGGGGCTTCACTGCCTCCTGGTTTTCGTTTTCACCCAACTGATGAAGAATTGATA
GGATATTACCTTAAAAGAAAAGTTGAAGGACTTGAAATTGAACTTGAAGTTATTCCTGTC
ATTGATTTCTACAAATTTGATCCTTGGGAGTTACCTGAGAAATCTTTCTTACCAAAAAGA
GATATGGAATGGTTTTTCTTCTGTCCACGGGATCGAAAGTACCCAAATGGATCAAGGACA
AATAGAGCCACCAAAGCTGGCTACTGGAAAGCCACAGGAAAAGACAGGAAGGTTGTGTGT
GAGTCTAGTCCATTCATTTCCATTGAGACCGTGACAGGTTACCGCAAGACCCTGGTGTTC
TACTGTGGAAGGGCGCCTTTAGGCGATCGAACCAACTGGGTCATGCATGAATATCGCCTC
TGCGACGATCCTAGCCAAGGCTCAGAGGGTGCTTATGCTTTGTGCCGAGTTATTAAAAAG
AATGAGAAATCCAATGATTCCCAAGGGCAAGGAAGAAAGAAGGCTAAAGCTAATGATGGG
AGCAATTCCATTTCCACCAATGGGAATGAGGTTTCTTCTCAAGCAAGTCAACTGTGCAGT
GGGAGTGAGAGTCTTTATTCAAGTCCTATTGATTTCTCAGGCAATGTGCCTCTTATGGCT
GGATTTGAGCAAGCTTCCTCTGATACCAATCCTTCAAGCTTCTGGCTCTCCCCTGACATG
ATTCTTGATTCTTCAAAGCAGGACTACTCTCAAGTGCAAGTGCAAGATGTTGTTGGATCT
TTTCCACAACAACATGACTTATTGAGTGCAATGACACCATGGCAATCATTTGAAAATACT
GAAATTTCACCTAGCTCATCCTACTCAAATTTTAATGCAGAAATTGAATTTTCTGACGCT
CTTAGTCGAATCGGCTGCATATCACCTTACTCAGGACAAGGAAGCTTCATGGACTTGCCT
TATGAATGCTATGATCAAATTCATTCATTTGGGGACCCAAAGAAATTCTAA
>CaNAC63
ATGATGGAGTCCATGGAGTCATGTGTCCCACCAGGGTTTCGATTCCACCCAACTGATGAA
GAACTTGTTGGTTATTATCTCAGAAAGAAAGTTGCTTCTCAGAAAATTGACCTTGATGTT
ATCCGAGAGATCGATCTTTATCGTATCGAACCATGGGATCTTCAAGAGAGATGCAGGATC
GGGTATGAAGAGCAGAATGAGTGGTATTTTTTCAGCCACAAAGATAAAAAGTATCCAACA
GGGACAAGAACTAACAGAGCTACTATGGCTGGGTTTTGGAAAGCAACAGGAAGAGATAAA
GCAGTTTATGACAAGATGAAATTAATTGGAATGAGAAAGACACTTGTTTTCTACAAAGGA
AGAGCACCTAATGGACAGAAATCTGATTGGATCATGCATGAGTATAGGCTTGAATCTGAT
GAAAATGGACCTCCACAGGAGGAAGGATGGGTTGTGTGTAGAGCATTTAAGAAAAGAGCA
ACCAATAGCCAAACAAAAAACACTATTGAAAGATGGGACACAAGCTACTTCTATGAAGAA
GCAAGTGGAATGAGTTCCATGGTGGATCCAATTGATCTAATCTCAAGGCAACCTCAAAGC
TTTTTAGCTCAAAGTTTCAATATGTGTAAGCAAGAGATAGAAGCAGAAAATAACAACAAC
AACAACAGCTTGATAAGTTGCATGCATGCAGACCAATTTATACAGCTTCCTCAGCTTGAG
AGTCCTTCATTGCCATTAGTAAAGAGACCAAGCATAGTGTCTCTAGTATCAGAGAATAAT
GATGATAATAATGATGATGATCAAAAGAGGTTATTATTATTATCAAACAACAATGTTACT
ACTATTACTACTACTAATAATAATAATAATAATAATAATAACAATAATCAAGTTACTACT
GATTGGAGAGCTCTTGATAAGTTTGTGGCTTCTCAACTAAGTCATGAAGATGAAGGAGTG
TTGTCAAGCTTTGGAACAAATATTCTTCTTCCTAACTCAGATATGGCATTGATGTTAATG
CAAGGTAGTAGGGATGAAGGGAACAAGTTCTTAAATGCAAGCTCAGACTGTGATATTGGG
ATATGCGTATTTGAAAAATGA
>CaNAC64
ATGGAGGAAAATCTACCTCCTGGATTTAGGTTTCATCCAACAGATGAAGAACTCATCACA
CACTATTTAACAATGAAAATTTCTGATCATTCATTCACATCAAAAGCTGTTGCAGTTGTT
GATCTCAACAAATCTGAACCTTGGGATCTTCCAGGTAAGGCTTCAATGGGGGAGAAGGAA
TGGTATTTTTTCAGTGTGAGAGATAGAAAGTATCCAACTGGACTTAGAACAAATAGAGCA
ACTGAATCAGGGTATTGGAAAACCACTGGAAAAGACAAGGAAATATTTCGTGGTGGAGTT
TTGGTAGGAATGAAGAAAACCCTAGTTTTTTATAAAGGTAGAGCTCCAAGGGGTGAGAAA
AGCAATTGGGTCATGCATGAATATAGACTAGAAAATAAACATCACTTTCGATCTTCAAAG
GATGAATGGGTGGTTTGTAGGGTTTTCCAAAAGAGCATAGCATCAAAAAAACCACAACAA
ACATCATCCTCCCAACCACAATCCCCATGTGACACAACCTCAATAGTAAATGAATTTGGT
GATGTTGAGCTTCATCATATGGATTATTCAACTAACAACATTTCACCACAAAATTTCAAC
ACTAATAATGTTAACACAAATATGAACTTGACAATGAATTCATGGCCATCTTCAAGTGAT
GTTCCTCATTCTCTTCCAATATCTCTACCATGGCCTTCTAGCTTGTTGAATCCAAATAAC
ATTAATGTAAATTCATTGCTTCTAAAAGCATTACAACTTAGGAGTTATCAACAACAAAGA
GAAGTTGTTGCACCAACAAATATTCATCATTTTGCACCATACATGTCTCAAGTTGGAGTA
CTATCTCATTCTCAACTTGGAAATGACCAAAGTAATAATGATTCAAATATAAGTGCTTCT
TCTTCAAAAGTTTTAGAATGTATGCCACAACATAATCAACAGGAGCAACCATTCAACTTG
GACTCTATTTGGTGA
>CaNAC65
ATGAGTAACAACAATAACTTGAGTTGTGTAAGAAACTCTGATCTCATAGATGCAAAGCTA
GAAGAACATCAATTGTGTGGATCCAATCACTGTCCTTCTTGCGGTCACAACTTCGAATCC
AAACCGGATTGGCTAGGTCTACCTGCAGGAGTGAAGTTTGATCCAACTGACCAAGAACTG
ATTGAACATCTTGAAGCTAAAGTGGAAGCAAAGAAAATGAAATCACACCCTTTGATAGAT
GAATTTATTCCAACAATTGAAGGAGAAGATGGAATTTGTTACACTCATCCTGAGAAACTT
CCAGGAGTAACAAAAGATGGTTTGAGTAGGCATTTTTTCCATAGACCATCAAAGGCTTAT
ACAACTGGGACAAGAAAAAGAAGGAAAATTCAAAATGAATGTGACTTGCAACAAGGTGGA
GAAACTAGATGGCACAAAACAGGCAAGACTAGGCCAGTAATGGTAAATGGAAAACAAAAG
GGTTGCAAGAAAATTCTAGTACTTTATACCAACTTTGGAAAAAATAGAAAACCTGAAAAA
ACCAATTGGGTGATGCACCAATACCATCTTGGTCAACATGAAGAAGAGAAAGAAGGAGAA
CTTGTTGTGTCAAAAATATTTTATCAAACACAACCAAGACAATGTAATTGGTCAGATAGA
AGTGCAACAACTATTGGTGAAGGAAATGGTGAACCTAATTATAGAGATGAGATGTCTAAT
GTTAATGTTAATGTTAATGTTAATGGTGTTACTCCAACAACAAGTTTCAATCATACCTTG
GATAATGTTCAAGCTCAACAACTAAAATCAGATCATTTCAGCTTCATTCCTTTTAGAAAA
AGCTTTTATGAGGTTGGAATAGGAGAAGCTTCAACGGCAAGTGAAGTGCAAGCAGCATCA
AGGTCATATGAAGAAGAAGTACATGAAAGACACAAACAACAAAATCATCACATTGCAACC
TCAGCATTCCATATCTCTCCACCTCCTCTTCACCAAACATCAATCATCCTTGATGAAAAC
TCCTACCAAGTCTCTAGAATTATGCTTCAAAATGAACATTTTCAGCAACAACAACATAAG
CTAGGAATAGGAGGAAGGTCTACTTCTTGTTTGGAGGAACTCATCATGGGTTGCACTTCA
ACAACTCATCATATCAAAGACAAAGAGGAATCATCCATCACAAACTCACAAGAAGCTGAA
TGGTTGAAGTACTCATCTTATTGGCCAGACCCTGATAATCCAGATCACCATGGATAG
>CaNAC66
ATGTCACCAGTTGGATTACCACCAGGTTTCAGATTTCATCCTACTGATGAAGAGCTTGTCAACTATTATCTAAAGAGAAAAATCAGTGGTCAAGAAATTGAACTTGATATCATTCCTGAAGTTGATCTTTACAAATGTGAACCTTGGGAATTAGCAGAGAAATCATTTTTACCAAGTAGAGATCCAGAGTGGTACTTTTTTGGACCAAGAGACAGAAAATACCCTAATGGATTCAGAACAAATAGAGCAACAAGAGCAGGATACTGGAAATCTACTGGAAAAGATAGAAGAGTTTCATGCCAAAGTAGACCTATTGGTATGAAGAAGACTTTGGTTTACTATAGAGGTAGAGCTCCTCAAGGAATTAGAACTGATTGGGTTATGCATGAATATCGCCTCGACGACAAAGATTGTGAAGACAACTCCGGATTACAGGATACTTATGCTTTGTGTCGCGTGTTCAAGAAAAATGGAATCTGTTCTGATATGGAAGAGCAACAAGGACAATGTAGCATGTCACTAATTGAGTGCTCTCAAACCATAATCAATGAGTGTGAAACAATGTCACCAGACATACTAGGAACATCATCGTCATGCTTAGAAGAGGACGACAAAGATGATTCATGGATGCAATTCATTACAGACGATGCATGGTATTCTTCTAATGCAGCAATGGTTGGTGGTGAAGAACTTTCACATGTTACATTTACAAATTAA
>CaNAC67
ATGGGAGTTCCAGAGAAGGATCCTCTCTCACAGTTGAGTTTACCTCCTGGTTTCAGATTCTTCCCCACTGACGAGGAGCTTCTGGTTCAGTACCTCTGCCGCAAAGTTGCTGGACACCATTTTTCTCTCCCAATCATTGCCGAAATTGATTTATACAAATTCGATCCCTGGGTTCTTCCAGGCAAAGCGATATTTGGTGAGAAAGAATGGTACTTTTTCAGTCCTAGGGATAGAAAATATCCGAATGGTTCTCGACCCAACAGAGTTGCTGGATCGGGTTACTGGAAAGCCACAGGAACTGACAAAATCATCACAACTGAAGGTAGAAAAGTTGGAATAAAAAAAGCACTTGTTTTCTATATTGGCAAAGCACCAAAGGGTACAAAAACTAATTGGATTATGCACGAGTATCGTCTTCTTGACGCAACAAGAAAACATAACCTTGGCAGCTCCAAACTAGATGATTGGGTTCTGTGTCGCATATACAAGAAGAATTCAAGCTCGCAAAAGGAAGTTCTGACATTTTCGAGCAAAGAATACAGCAACGGGTCGTCGCCTTCATCGTCGTCCCACGTGGACGACATGGTGGACTCGTTCCCAGAAATCGACGACCGGAGCTTTGCACTACCGCGTGTGACATCGCTCCGAATGCTTCAACAGGAGGAGAAGCTCGGATTTCACAACATGGATGCCGGAATATTTGCGGATTGGGTTAATCCGACGGATCTGGAGTCAATACCCGAATTTGATTCAGACTATAACACGCAGGGGACATTCAATTTCAATTTTAATGACCATACTGTCCCTTCGGTGCCGCCGTTTGGTTACATGGAGTTAACGACGGCATGCAGGAAAGCCGCCGAGGAAGAGGTTCAAAGCGGGATGAGGACCCAGCGGGTTACCGAGACTTCCGGATTATATCAGCATAATTCAAATATATTTTTATCGGGTTTGGGTGACCCGTTTGGGTTTAACTATTCGGGTCACTAA	
>CaNAC68
ATGCCTGAAAACATGAGCATATCTGTTAATGGACAATCTCAAGTTCCACCTGGATTCAGGTTTCATCCAACTGAAGAAGAGCTTTTACAATACTATTTAAGGAAAAAAGTCTCTTATGAGAAGATCGACCTTGATGTTATTCGTGATGTTGATCTCAATAAGCTTGAACCATGGGATATACAAGAGAAATGCAAAATAGGTACAACTCCACAAAATGATTGGTACTTCTTTAGCCACAAAGATAAGAAGTATCCAACCGGAACGCGAACGAATCGCGCCACGGCTGTTGGTTTCTGGAAAGCCACCGGTCGGGACAAAGTTATATATAGTAATGGAAAAAGAATTGGAATGAGAAAAACTTTGGTTTTCTATAAAGGTCGCGCCCCTCATGGCCAAAAGTCGGATTGGATCATGCATGAATACCGACTAGATGATAACACCACCAACGACACCAATCTGGTGTCAAATGTGATTGGTGATGGTGGTCAAGAAGAAGGATGGGTGGTGTGTAGGATATTCAAGAAGAAGAATCATCTCAAAACCCTAGATAGCCCATTAGGGTCATCAATTTCTGGAGATGGAAGAAGAAACCACCTCATGTATGATCCTTGTGATGATGAGGGAGCTTTAGAGCAAATACTTCGACAAATGGGAAGAGGTTGCAAAGAAGAGAATTATGAAGCAAATTGCAATAATAATTATGAAAGGTTTGCAAGACCTTTTGACCACACTAACCTCAACAACATGAATGGTGGTAATTATAATAATGAAAGGTTCATGAAACTTCCAAGTTTAGAGAGTCCAAAATCAACAAGCATGGAGAACAATGAGAACAACAATAATAATGGGTACCATGCAATTATTCAAGAAAATGAAGGGTCATTCACTAATAACCATAACAACATGGTGAATCCATTAGAGACATCATCATCATCAACACAAATGGTTAGTGGCCTCACTAATTGGGTAGCTTTGGATAGACTTGTTGCTTCTCAACTCAATGGACAAACTGAGGCTACTAGACAATTGGCTTGTTTCAATGACCCCACTATTGGATATTGCACTAATGATCATCATGATCTTCAATTTCCAACCCTTAGATCATCATCATCAACTTCATCAATATCAATACATGCTAAAGCAACAACTTCAACTACTACTTCTACTTACATTACTCCCTCACAAGACTATACTAGTGAGATTGACCTTTGGAACTTTGCTCGATCAACTTCATCCTTGTTGTCATCTTCTGAACCAATATGCCACGTGTCTAACACATCAGTGTAA	
>CaNAC69
ATGCCTGAAAACATGAGCATATCTGTTAATGGACAATCTCAAGTTCCTCCTGGATTCAGGTTTCATCCAACTGAAGAAGAGCTTCTACAATACTATTTAAGGAAAAAAGTTTCTTATGAGAAGATTGACCTTGATGTTATTCGTGATGTTGATCTCAATAAGCTTGAACCATGGGATATACAAGAGAAATGCAAAATAGGAACAACTCCACAAAATGATTGGTACTTCTTTAGCCACAAAGACAAGAAATATCCAACCGGAACTCGAACAAATCGCGCCACGGCTGCTGGTTTCTGGAAAGCCACCGGTCGAGACAAAGTTATATATAGTAATGGAAAAAGAATTGGAATGAGAAAAACTTTGGTTTTCTACAAAGGTCGCGCCCCTCATGGCCAAAAATCGGATTGGATTATGCATGAATACCGACTAGACGATAACACCACAAATGACACCAATTTGGTGTCGAATATGATTGGTGATGGTGGTCAAGAAGAAGGATGGGTGGTGTGTAGGATATTCAAGAAGAAGAATCATCTAAAAACCCTAGATAGCCCATTAGGATCGTCAATTTCTGGTGATGGAAGAAGTCACCCCATGTATGATCCTTGTGATGATGAGGGAGCTTTAGAGCAAATACTTCGACAAATGGGAAGAGGTTGCAAAGAAGAGAATTATGAAGCAAATTGCAATAATAATTATGGAAGGTTTGCAAGACCTTTTGATCACACTAACCTCAACAACATGAATGGTGGTAATTATAATAATGAAAGGTTCATGAAACTTCCAAGTTTAGAGAGTCCAAAATCAACAAGCATGGAGAACAATGAGAACAACAATAATAATGGGTACCATGCAATTATTCAAGAAAATGAAGGGTCATTCACTAATAACCATAACAACATGGTGAATCCATTAGAGACATCATCATCATCAACACAAATGGTTAGTGGCCTCACTAATTGGGTAGCTTTGGATAGACTTGTTGCTTCTCAACTCAATGGACAAACTGAGGCTACTAGACAATTGGCTTGTTTCAATGACCCCACTATTGGATATTGCACTAATGATCATCATGATCTTCAATTTCCAACCCTTAGATCATCATCATCAACTTCATCAATATCTATACATGCTAAAGCAACAACTTCAACTACTACTTCTACTTACATTACTCCCTCACAAGACTATACTAGTGAGATTGACCTTTGGAACTTTGCTCGATCAACTTCATCCTTGTTGTCATCTTCTGAACCAATATGCCACGTGTCTAACACATCAGTGTAA	
>CaNAC70
ATGGAAGAGAGAAATGGTGGTGACAAACTTGATGAAGTTATGCTTCCAGGTTTTAGGTTTCATCCAACTGATGAAGAACTAGTTGGATTTTACCTAAAGAGAAAGATTCAACAACGTCCTCTTGCTATTGAGCTCATCAAGCAGCTTGATATATATAAATTTGATCCTTGGGATCTTCCAAAGTTGGCAAGTACAGGGGAGAAAGAGTGGTATTTTTATTGCCCTAGAGACAGAAAGTATAGGAACAGTGCAAGACCTAATAGAGTAACAAGAGCTGGGTTTTGGAAAGCTACTGGAACAGATAGACCTATTTATTCCTCAGAGGGTTCTAAGTGTATTGGTTTGAAGAAATCCTTAGTTTTCTACAAAGGTAGAGCTGCTAAAGGGGTCAAAACTGATTGGATGATGCATGAGTTTAGACTTCCTTCTCTCAATGATTCATCCTCATCTCCAAAGAAATATGTAGACAAAACTATTCCAGCTAATGAATCTTGGGCAATCTGCAGAATATTCAAGAAAACAAATGCAACAGCTCAAAGAGCTCTCTCTCACTCATGGGTCCCTCCATTACTTGAAACATCAACCTCCAATCTTCTAACAAATGATGGAAATAACAACCAATTTTGTTCACAAAACATGATGTTGTTGGCCAAAAAACCAAACTTCACAAGCCAATTTTGTGCTACTAATAACCACAATACCACATCAAGTAATACTACACTTTGTCCTTTAAATATTCCATCTTATAATAATAAACCAATCATTGATCCATTGATTTACACACCCTTATACAAGTTACCAATTTCAAATGATCAAAACCTTAACAACCTTAGCACACATGGCTTATTATTCTCATCTCCTCTTGAAACATCTTCTACAAATTGTAACAAAACATCATCAATGGATGTTTCTTCTTTGCTATTGGGTATGTCATCATCTTCTTTCCTTGAAGGAGCAACAACCTCAAACTACATTGGTAGTTTACAAGACCACTACAATAATAATAATAATAATGGATATCCAATAATGGCTAATAATATAAATCCTAATGTGAATGTGGCTGGTGTTAATGATGAAGAGTTGGAGAGAGAAAGATCCATTGGGTTTTCATATAGTATGCCTTTCAATGTTGGTGATGCATGGAAGTCAAGTCTTGTTTGGGATACTTCTTCTTGTACTTCGGATGAACCATCTGGTTATTCTACAACCAAGTGTTATACTTAG	
>CaNAC71
ATGGGCGCCGTCGATTGTTTACCTCCGTCACATGCGGAGGAGATGGCTGTGCTTTCTTTAAACAAGCTTCCGTTAGGTTTCCGGTTCCGTCCTACTGATGAGGAGCTCATCGATTTCTATCTCCGACTTAAAATCAACGGAAACGGCGATGAAGTTTGGGTTATCCGTGAAATCGACGTGTGTAAATGGGAGCCTTGGGATTTACCTGACTTGTCAGTGGTAAGGAACAAGGATCCAGAGTGGTTTTTCTTCTGCCCGCAAGATCGTAAGTATCCAAATGGAAGCAGGTTGAACCGAGCGACAAATCATGGGTATTGGAAGGCGACGGGTAAAGATCGAAAGATTAAGTCTGGCCCTACCTTGATTGGAATGAAGAAGACTCTGGTTTTCCATGCTGGTCGTGCTCCGAAGGGGAAGAGGACTAATTGGGTTATGCATGAGTATAGGCCTACCTTGAAGGAGCTTGATGGTACCAACCCTGGACAGAACCCATATGTCCTCTGTCGCTTGTTTAAGAAGCAAGATGAGAGTATTGAAAGTTCAAACTGTGGTGAAGTGGAGCAGACTGCTTCAACTCCTATGACTGCCAATTACTCTCCCGAAGAAATACAGTCTGATCCAAATGTGGTTCCTGGTGCATCTTCCTCACAGGTCACAGAAGACTATAAGCACCTTGCAGCTATCCCTGAGAACTCCGAGGAAGCAATATCCAACTTTTTAACCCCAGCTGATTGCTATAGGGATGCATGCAATGCTTCTGATGCACAAAATCAAATTGTAACAACAGCTGCAGAGGAGGATCAGCTGTTTAACTTGGACATATTTGATAGCCCGCAATTTGAGCAATTGGATGATAAATTGTTCTCCCCAGTCCACGCACATTTTCCACAAGATTTTTTTTATGAAACCAACAATGAAGTAGAATTTCAGTATGGTACGAACGAAACAGATGTTTCAGACTTTTTCAACTCGGCTGTTAATTGGGACGAGGTCTCCCGCGAGGCGTCTAGCAGTCTAGAGCTGAAGTCGGACTTGCTTCATGTTAAGGACAATGGGTCGTGCAGTGACTCGGAAGTGGAAATGGCCAATATGATGCATCTGCAACCATTACATGCTTATCCTGAGGGGGTGACTCCGACTCCGCAAAATAGCGATGCAGGGCTGTTTTATTCATCCTTTTTTAGTACTGGCCCGACACCTACTGTAGTCGATGAATGTATGGGCCAAACACCCGCTGTAGTCGATGAATCTATGGGCCAAACACCTGCTGTGGTCGATGGATATGAGCAAATGAGGAATTTGGATACTGTAGTCCAAGGTGACACCGGAATCAGGATAAGGACTCGACAAAGACGAAATGAACAGCCAATCACGAACCCAGTGATGCCAGCACAAGGTAGTGCACCGCGGAGAATACTATTGGGAGGATTTGTTACGCATTCCCTTGTTTCTGAGGAAACGACAAAAGATAGGAGTTCTGCCCCAGTAAACCATAACTCGGAAACTATCATTTCTAGGGAAAAGCAAACTTCAGAAAAACATGCTGCTGGGGAGAGTGCCACGGACACCAACATCAATGATGTGGATGAACTGGAGAAGACGTCTCTCGCATCAGACGACACAAGAAAGATCTCTCAGCAACATGTTACAACTACAGAATCCATATTGGAGTGGAAAGACTCTTTATTAGGAAGAAGGGTCTGTTACTCGTCAAAGATTTCGTCGAATCGTGCCATGTGGTCTTCGGTTCTTGCAGTTTCTGCCATTGTACTGGTCTCACTAGTATTGTTTGTTAATATCTGGGGATATCTTAGAATTGAAACTGCTCATTAG
>CaNAC01
MDNNSINNVNLPPGFRFYPTDEELVLHFLHRKKTPLLPFHPDVIPDLHLYSYDPWQLHGR
ALAEGNKWYYYSRRSTQNRVTCNGYWKPTGIEEPVFCSTKNNRIGIKKHFVFHMGESDSV
GIKTNWIMHEFRLSHSSTNSSSSSSKIKSQPIKDYSKWVICRVYESKGDDDDDGTDQLSC
LDEVFLSSLDDFDEISLPNYN

>CaNAC02

MEGKQKGSSYTFPPGFRFHPSDEELIVHYLQKKIKSLPLPASIIAEIDLYKYNPWELPKK
SLFGEEEWYFFSPRDRKYPNGLRPNRATGSGYWKATGTDRPIISSCGSKHIGVKKALVFY
SGRPPKGAKTDWIMNEYRLIDTTTKSFMLKGSMRLDEWVLCRVRHKGYSSKNLSENQENP
CEPNIPVNLQTSEEHPTNTKFRADMITDYQYKDYQIIASILVGGVIPPNENMSSLSFKGS
KGNNLTSEYEEGSNKVNSQTAIPSLECYFNPLKRKSNEDDDQFENLISFTSKFNTENKID
KSFNKVLTNRELNCYEIFNGSTPNPSIDFQELNELNFAE

>CaNAC03

MTQCSYPENNHSTVIVERRKDSLIRTCPTCGHHIKCHEQAAGIHELPGLPAGVKFDPTDQ
EILEHLEAKVRSDIQKLHPLIDEFIPTLEGENGICCTHPEKLPGVSKDGLLRHFFHRPSK
AYTTGTRKRRKVHTDEDGSETRWHKTGKTRPVYVSGKLKGYKKILVLYTNYRKQKKPEKT
NWVMHQYHLGNNEEEKEGELVVSKVFYQTQPRQCGGSLMKDSSMIFSDKLNGGQDVHEVV
NHKNSGFVEYYNTSFISFDQGEQQHRSSNAQVISHFPVHDGTPFIP

>CaNAC04

MEMVSKEAQMSIAASSMFPGFRFCPTDEELISYYLRKKLDGHEESVQVISEVELCKYEPW
DLPAKSFIQSDNEWFFFSSRGRKYPNGSQSKRATDCGYWKATGKERNVKSGSNVIGTKRT
LVFHLGRAPKGERTEWIMHEYCISDRSPDSLVVCRLKKNTEFRQNDASNRASSSHMNAVN
SHESDCAASEGGIDQRGVCEQDKEVDGSSKRGSSSYGSPSMEQIDSVSESNQRPANDTTL
TESSGHLKMDEEDCYAEILKNDIIKLDESSMSQGAQTRPPDPANSQPCQGTAQRRIRLRV
EKSTHSQPGVRFSRTMHQSKSSSFARMTNHLMIFAFFVIALMVLFFWSLLGGHKQMKYCV
KILGVNLVMSRPMLLVFLLIILIITSQFEWKQQLVADVELNPAVSQKQHHISTAEETVKE
KIILVQEKNIRRLNELVRHLQEQLQQCKGSNGTINSTVGPLTERILELERQQILED

>CaNAC05

MESTDSSTGSQQPNLPPGFRFHPTDEELVVHYLKKKAASAPLPVAIIAEVDLYKFDPWEL
PAKATFGEQEWYFFSPRDRKYPNGARPNRAATSGYWKATGTDKPVLTSGGTQKVGVKKAL
VFYGGKPPRGIKTNWIMHEYRLADNKPNNRPPGCDLGNKKNSLRLDDWVLCRIYKKSNTH
WSPVEHDREDSMDDMIGGVPPSINVGQMNARFHFSKMSNSYNNTLLENDQNLLEGMMLSN
NNNNNNTVATLSSQLGGSASTSNASASKRTLSSLYWNDHEDVAASNKRFNLESDHHHGSV
VRNDQESGTVATSFASLLNNLPQTPNSLHQQTMLGSIGDGLLRTTPYQIQGMNWYG

>CaNAC06

MGIQDKDPLSQLSLPPGFRFYPTDEELLVQYLCRKVAGHHFSLQIIAEIDLYKFDPWVLP
SKAIFGEKEWYFFSPRDRKYPNGTRPNRVAGSGYWKATGTDKIITNEGRKVGIKKALVFY
VGKAPKGTKTNWIMHEYRLLDSSRNNTGTKLDDWVLCRIYKKNSSAQKAIPNGIVSSREY
TQYSNDSSASSSSHLDDVLQSLPEIDDRCFMLPRVNSLRTMQHRQEEDKLNLLNLNNNNL
MDWSNPSSILNTEFQEGQNNGMVNYSSCNDLYVPSVSTICHVNTSGTEKKPMEEEVQSGG
ARTNPGLFERGSNNFTYSNSVDSFGFRYPVQPVGFGFGQ

>CaNAC07

MAPMTLPPGFRFHPTDEELVAYYLERKITGRTIELDIIAEVDLYKCEPWDLPEKSFLPSK
DMEWYFYSPRDRKYPNGSRTNRATRGGYWKATGKDRAVNSQKRQVGMKKTLVYYKGRAPH
GIRTNWVMHEYRLMESHPGASLSSLKDSYSLCRIFKKTIEIPTKLKENQEQLEDTKKEQG
QGEDSSGTEISREMENMDHEKVLNNHEHPKFPCDASSSDVTQGTYTPTNTCNNITDDFQP
QFACDEANSASISYPMGIGYPSNIFQDIEIPMYGGFHNHIPEAPFMMEDLPQINIMDTKS
TLMKPEMIITDDCILYDRYRDCMNGTLEEIISLCSSQDHSMAFPML

>CaNAC08

MMQGSGQLTVPPGFRFHPTDEELLYYYLRKKVSYEAIDLDVIREVDLNKLEPWDLKEKCR
IGSGPQNEWYFFSHKDKKYPTGTRTNRATTAGFWKATGRDKAIYHTNSKRIGMRKTLVFY
TGRAPHGHKTDWIMHEYRLDDNDAEVQEDGWVVCRVFKKKNTSRGYQQEIEEEDHIMNHM
RTTNAPCHNNILEPKHHHHKQQQQGLLYDYNNNNNSFDATIHLPQLFSPESAVPPPPPTS
FPSSMDILECSQNLLRLTTPAFSGLNLMQQQGERFHGDWSFLDKLLASHNGIDHHHTLRN
KCNTNNQHGAAPSVETSAHKFPFHYLGCHSHHDIMKFSK

>CaNAC09
MDNFYHHHHNHIINNNNNNNNNNSDAHLPPGFRFHPTDEELITFYLLKKVLDNTFTARAI
AEVDLNKCEPWELPEKAKMGEKEWYFFSLRDRKYPTGLRTNRATEAGYWKATGKDREIYS
SKTYSLVGMKKTLVFYRGRAPKGEKSNWVMHEYRLEGKFAYHFLSRNSKDEWVISRVFQK
SHTGTGSSTVSATTSGSKKTKITSTTSASNNSMSLCPEPSSPSSVYLPPLLDSSPYTAGT
AATAFDNRQMCTYNNNNNDNNSSNNTTKEHVSCFSTTSTTSNVVSCHNNFNNNNGSFDLV
SPSMNAMDPFARFQRNVGVSAFPSLRSLQDNLQLPFFFSTAAQPYHGGDNILSGWGLPEE
QKVVDTGGVVNMGGLGSSELDCMWNY

>CaNAC10
MGVNDDFNKDNEYVDDDVPLPGFRFHPTDEELVTFYLRRKLDNKSIAIDLIKQIDIYKYD
PWDLPKASVPGAEKESYFFCKRGRKYRNSIRPNRVITGSGFWKATGIDKAVYSNGGEGND
CVGLKKTLVYYRGSAGKGTKTDWMMHEFRLPSNIHTNNNDAHIAQEAEIWTLCRIFKRNV
SQRKQQIAEVKQLATKRQMIHDKSSRMSSNVEFNINNQQTFINFGASHENHHNNNIEDKL
MINTNYTNIDQRNHQLMSCQVSQQPQQNVTLSNSNLWIKQQVENELLMFDNWDELGSVVK
FAVDSPSL

>CaNAC11
MSNISMVEAKLPPGFRFHPRDEELVCDYLMKKVTHSDSLLMIDVDLNKCEPWDIPEAACV
GGKEWYFYTQRDRKYATGLRTNRATASGYWKATGKDRAILRKGSLVGMRKTLVFYQGRAP
KGRKTEWVMHEFRIEGPHGPPKISSSKEDWVLCRVFYKNREIAAKPSMGSCYDDTGSSSL
PALMDSYISFDQAQFHADEYEQVPCFSIFSQNQTNPIFNNMEPKLPPYNNNNNNNANTFG
GAPNLGNYSLDPLSCDRKVLKAVLTQLSKMERNNPLNNNNNNNNQSLKGSPSLGEGSSES
YLSEVGMPHMWNNY

>CaNAC12

MEERSKMDNYDEVDDVILPGFRFRPTDQELIGFYLKKKIQQKSLPIELIKQVDIYNYEPW
DLPKLASTSSEKEWYFYCPRERKYKNSSRPNRVITRNNGKSIGYWKATGTDKAIYSSDGK
CIGLKKSLVFYKGRASNGNKTDWMMHEFRLPCISNSTSPKKLFDKSFSPNDSWAICKIFE
KPTSSSMVQKALSHPWISQLPGGRVSELLTQTSNTNQLCSQSNISLSTKTEQESSTIKFC
SNNTNNFSPSYFPNYTISKSSQIPNGDNVVHNNIMLYNTTEATDSTKCPIDTSSIISNTN
YIGLEDANNQYSNFSINLPKDIQPNIGTELEEQDWKKNPYYWETIGRTIEFPFNLSPNYD
ALRENFTWDSLPCTSEMSTNYVTSVAKCYT

>CaNAC13
MMDAMEKKSRDLESDEKFELPPGFRFHPTDEELITHYLSQKVLNSCFCAIAIGEADLNKC
EPWDLPWRAKMGEKEWYFFCVRDRKYPTGLRTNRATCAGYWKATGKDREIFREKTLIGMK
KTLVFYKGRAPKGEKTNWVMHEYRLEDKYSLQNTSKRTMKEWSICRVFEKSSCGKKMHIQ
DLVRFNSIGKELPPLMDSSPNNSELKSTIGDSSHVTCFNQNLIEDSQRIQNDNIIDSFES
PILTSSYSYSSNPYDNNISSASWTQNLSHQSTQVVNSKSSDCFMVQEQSMLRMLIENHGT
STKTKFEKDQECDFDVDISSMIYNNEMFQVNQEYSIGHLDNGFLWNF

>CaNAC14

MDEPIVLNKVDESLDLPPGFRFHPTDDEIITCYLINKVLNSNFSATAIGEADLNKCEPWD
LPKMAKMGEKDWYFFCQRDRKYPTGTRTNRATESGYWKATGKDKEIYKGKSNQLVGMKKT
LVFYKGRAPKGEKTNWVMHEFRLDGKFATCNLPKDSKDEWVVSRIFNKSNTEIKKNSFSN
LLRINSLSDDLLDFSSLPPLVDPPFSNTINSPPSSSSKPPPNGNYFPSYLINNNIQNQIP
SYNIATNQENTFSHQPQNQIQIQNSSSQLQQNMLSNYSYNMQQGNHNNTYIYGLDNKECK
MEQFSTNNSMVSVSQDTCLSNDINTDTSSVVSKQEIGRNTTLYEDFECPSSIGPLSNFES
LWNDY

>CaNAC15

MEERNDGEKLDEVLLPGFRFHPTDEELVGFYLKRKIQQRPLSIELIKQLDIYKYDPWDLP
KFATTGEKEWYFYCPRDRKYRNSARPNRVTGAGFWKATGTDRPIYSSEGSKCIGLKKSLV
FYKGRAAKGVKTDWMMHEFRLPSLIDPLSPNKYIDKTIPTNESWAICRIFKKTNSTAQRA
SSQSWVSSLNSETRTSMLTKNQETTQFCSNNMSQTKKTTLPNNFFTNNNNNTQNFDVDVD
VTTPYKSIINPLLHKAFDHLPISNNDLNTSLIFSSSPLETSNTNINFSKSTMDVSSMLLN
MSSSMFVGDFSKTCDEDITTNFNDGLQEHFSDYSTSFLQTTFGNNQYDNNALVKINPYYY
NNVNVPRVDDQDFNIGDAWKSNLLWDTSFCPCDVPSTYYSTTKCYT
>CaNAC16

MNGRTSSDLPPGFRFHPTDEELIVYYLCNQATSQPCPASIIPEVDIYKFDPWELPDKSDF
VENEWYFFSPRERKYPNGVRPNRATVSGYWKATGTDKSIFSGSKHIGVKKALVFYKGRPP
KGLKTDWIMHEYRLIGSRKQANRQIGSMRLDDWVLCRIYKKKNTTKSFDTREEYPTNQIN
VSPRNDDDSEQELMKFSRTCSLTNLLDMDYLGPISQILSDGSYNSTFEYQINTAHGGIIV
DPFVKSQMVEMATNSYAADSEKNNVKQNSSFNSTLFGNQVYDHRE
>CaNAC17

MALNFPSTTRIIKPTDEELFQSFLYNKINNNPLPNHIAIIELDLFGTKKNPWEIWEEFAT
SHSYCGRDLYFFSALKKKSATSSRSVRLIGKGTWEGEDTGTEIFTKDTNQLLGLRKRYRF
EKSDTVHDNGWILHEYKLDASLIANPSAENYVLCRFRKNVKKNPVSTRNRIAKNANRRLQ
RNNTSMGNTGRGRKRKKTVAECEATTISGNNNNNVVVREYTIYEEPINQSNGGHNSSNDG
HNSSMVVKKEYEYKKGVEEEGVKNTCPNDIIVIALESSTDSGNENINQRPRSPIDSGNNK
TEVVKTTKEKEVDSIMNKEEDDNLNMSWPEYFAMELKMINEGCLIQEEEYVPMLSNSFHK
DLILECFNMY

>CaNAC18

MAGPSWLVDKSRIATKIRSASGACHPENVTWKSNPSKTCPNCQHAIDNSDVAQEWPGLPK
GVKFDPSDQEIIWHLLAKVGVGNSKPHPFVDEFITTLEVDDGICYTHPQNLPGVMQDGNA
SHFFHRAVKAYNTGTRKRRKIHDQDFGDVRWHKTGKTKPVILNGVQKGFKKIMVLYMSSV
GGGKAEKTNWVMHQYHLGTDEEENDGEFVVSKVFYQQQQVKLGDKNELDIPEATEATIIK
VDPVTPKSVTPEPPYNERQYSDVDLGQETPAIPQPPQMDCLDEIQADCEEHAIDDLSMIE
TENNEETYDKEINADEGQKWWDSESQNLLDSQQLVEALSLCDDLLHSQSPERDDEHGEHK
NQPSLSVYAQLGPEHLKKDIEDCQNLVLDPANTAEHDAPPSELRLSQLEFSSQDSFIAWG
YSKALK

>CaNAC19

MAPVSLPPGFRFHPTDEELVAYYLKRKINGRNIELEIIAEVDLYKCEPWDLPGKSLLPGN
DMEWYFFSPRDRKYPNGSRTNRATKSGYWKATGKDRKVNSEAQAVGMKKTLVYYRGRAPH
GCRTNWVMHEYRLHDRECETTSALQDAYALCRVIKKNTVIVPKVGGQYGNLTTHDNQITT
VSQGRGEDLDSSNYLMQINTCSPHNIGNQISLNRDHGNCSHFSYDDPSFTLPTSSSFTNH
GPIAYPPSKVDIALECARMQHRFTMPPLVVEDFPQGSKTKTDILQEILSHTHASQELMNQ
SNYSQAYDDNENYAPCEDDFTFMVGTNYNHINDLNSMSYVDKPWEDLSTRSIEIGDQDEE
FKEKRMVENLRWIGMPREDFEKMAEQKVVQIEDISCFQTIREQNGMQEYDQHNSNLDVNE
FSIGFINDGDPNENFIEDGNMDDYSSSPSFYEVIEEIKVSHGLLVSTQQVAMTFFHQVVP
SQIVQVQLNPKMIEKNNHSIKNVEAMMMIMENQGSLFRKFKAYVMGNLINPSKKIASLVV
FLFSLLLMHCVYMEKEVEIWKQNLENVKEKRMRESYEIIKWNESKEVWFVGVKSEKGLSV
VLKKIGIFLTMCLALCFMWASHSN


>CaNAC20

MDVSKLQNSNEKKEDEVVLPGFRFHPTDEELVGFYLRRKVEKNPLRIELIKQIDIYKYDP
WDLPKTSNVGEKEWYFFCLRGRKYRNSIRPNRVTKCGFWKATGIDKPIYCVKESHECIGL
KKSLVYYRGSAGKGTKTDWMMHEFRLPPKGKINNHDVQEAEVWTLCRIFKRIPSYKKYTP
NLEKDLATTVTNSSSSKTCSLESDNSNKPYLTFRDSQVVVQQNESKPFINGQLDQSINYS
FLSHVAHEAPTTLSHSCFWNDHSVGDDALANENWDSLRSVVQFTFDSSKVYDDCKYFN

>CaNAC21

MNLVKKKNGEVKLPPGFRFHPTDEELVVQYLKRKVFSYPLPASIIPELHHLSNSDPWDLP
GDLGEERYFFSTKEAKYPNGNRSNRATNSGYWKATGLDKQILNSNSNVVVGMKKTLVFYK
GKPPHGSRTDWIMHEYRLTNHSSSLKQNWVVCRIFLKKRGGAKNGGGRGGENTVTVREKP
SKVKNSNSNSNSKVVVFYDFLSSPILSATSGITEEHNENENENEHEDSSSSFPSLTNNN

>CaNAC22

MGSMENVSVPKMEEEKFEFPVGFRFHPTDEELINQYLVKKVDYNSFCAIAIAEVDMNKCE
PWDLPELAKMGETEWYFFCMRDRKYPTGQRTNRATLAGYWKATGKDREIFKENALIGMKK
TLVFYKGRAPKGEKTNWVMHEFRLDGINLSEQNLSKPGMGEWVICRVYEKGDYGKKVHGP
KLGRFDSKEGASTTNSLLPPLMDSSLYKSETKFTTGEFSPVNSFSIPNQTQNQKTLDDIV
DNNGTSILNISCSSKAIDDYPLAEAAFAVSNQSSQVAPQIGNPQYSNCFLSQEQSMLRMQ
LENENLESSAKQCVKADFSVGRDFDSDISSVVFGRDILQRWFGNPELSPASTGPVVTDSL
WNF

>CaNAC23

MALDFLAEFDQPDCRRLPVGYRFDPTDDVLVCFYLKKKVYNLTLPYHAILDFDVFQTEPW
LLPGDLNAFKDRRYYFFDIRQREFDNMDIRPAGNGEWRTIEKNMELDLPSQFFVGKKNTL
VFWWKKQGNQHIMTRWMMHEFRLTTVIQPTKISAVGAYRIFKRKLEKPLRNNIIRPVVID
FTMEDATACPPPPPMSP

>CaNAC24

MGTPQSNLPPGFRFHPTDAELILHYLRKKIASIPLPVSIIAEVDIYKLDPWELPAKASFG
EKEWYFFSPRDRKYPNGARPNRAAASGYWKATGTDKTIVASLPSGGRRSHDNIIGVKKAL
VFYKGKPPKGVKTNWIMHEYRLVDNNKPIKLKDSSMRLDDWVLCRIYKKSKCALSLTEAE
TMVGDVDQAKETQIKDTLFQITKNSTSPNQNTLMSQKSMSFSNLLDAMDYSMLSSFLSEN
HSNPSGIGSSTSFNTENFNQPSSQINTNNNYMFQKNTSKQQLSNIDEDTLLYQSKKYLNS
SCNFPNINSQYENYLMKQSLLNQQLILGPHLQFQG

>CaNAC25

MEEPIVVNKGEDQGLDLPPGFRFHPTDEEIIVCYLTEKVKNSKFSATAIGEADLNKCEPW
DLPKKAKMGEKEWYFFCQKDRKYPTGMRTNRATDSGYWKATGKDKEIFKGKGNLVGMKKT
LVFYRGRAPKGEKTNWVMHEFRLEGKFANYHLPKAAKDEWVVSRVFHKNTDVKKTQISGL
LRMNSINDDLLDYSSLPPLMDPSYTSDELKGITNQISSSKSQSDGYYLPSFSINNHNQLV
IKPEDHNHRNYDQTQTIMNYTSNISNSIQSNLNNPIGNTLSQPQIRIQNQNLNYFVYQQN
RMQNVNSISSFGNNHDQAFVRPFGAKNNSECKMEQFSSNQSQDTGLSNDTSSAVSKQDMG
RNRALYEDLEGPSSSVAPLSDLECLWDY

>CaNAC26

MGLRDIGASLPPGFRFYPSDEELVCHYLYKKISNEEVLKGTLVEIDLHICEPWQLPEVAK
LNANEWYFFSFRDRKYATGFRTNRATISGYWKATGKDRTVLDPMTQEVVGMRKTLVFYRN
RAPNGIKTGWIMHEFRLETPHMPPKEDWVLCRVFHKSKEDNNNNNNSKINTQQLMYETTH
PSLTLASSSPTNQTMPSVYNRIDSFSSSMTTLHHLIPNQNNSSMMNLLHYSRDTNPNNNN
STITQISSKGDHDGYGFLWNMDLEENSLEDGVASNLDAIRFEVDNNNMVLL

>CaNAC27

MDKKNHHSEIQLPPGFRFHPSDEELIVHYLRNKVTSSPLPASFIAEIDLYKYNPWELPSK
ALFGDEEWYFFTPRDRKYPKGLRPNRAAGAGYWKATGTDKPIFTSYGLKSIGVKKSLVFY
KGRPLKGSKTEWIMHEYRLHDSIISNSNHSGSMRLDEWVLCRVRQKTGSPRSSCEDSNEL
SFETSSHFQQMNDNSSPEPVKNYVQKQNEYPMLPYILASKSVLPNSIGMSSNNEKSHASL
YENNLNIIGAQFLSSAAEGLFNPQKRKAVEENIEMDFYAVLNKNLSREVDDVNQRLEIDL
SKGYNSYNFDQWTSIIQPQELNSLAFTGYT

>CaNAC28

MENMLPGYRFYPTEEELISFYLHNMLEGDNEYKIRTVIPVVNIYDYNPSELPQISGEASM
RDMEQWFFFIKRQESEVRGGRPKRVTTTGYWKATGSPNHVYSSHNHIIGMKRTMVFYSGR
APNGKKTDWKMNEYKAIQDQPSSSNKLAPMLRNEMSLCRVYKKSKCLRAFDRRPAPRRVT
NDQEFNKDSTICNHNNVQIFATSSPDSSSSLDHGQTSNEVGEGSQMDINVDHREPLLYWE
HVDWFLGIEP

>CaNAC29

MGLRDLGASLPPGFRFYPSDEELVLHYLYKKITNEDVLKGTLEEIDLHTCEPWQLPEVAK
LNATEWYFFSFRDRKYATGFRTNRATTSGYWKATGKDRTVFDPITREVVGMRKTLVFYRN
RAPNGIKTGWIMHEFRLETPHMPPKEDWVLCRVFYKGKTDNSAKLSPQDMYETLPPSLTL
DSLSPTNQIMPIGYNQLASFSSSMTTHHFHNPNVNQNNSLMNLLQFSKETNTNCSSVTQI
SPKCDDGYGFLWDMDLDGVASSNLDGMRFEVDNNSMVLL

>CaNAC30

MGHETLLLPAPPTTVNPPLSASSTAAPPTSLAPGFRFHPTDEELVIYYLKRKVCGKHFRF
DAISEVDIYKSEPWDLADKSRLKTRDQEWYFFSALDKKYGNGGRMNRATSQGYWKATGND
RPVKHDLRTVGLKKTLVFHSGRAPDGKRTNWVMHEYRLVDEEMERAGSGPSQPQDAYVLC
RVFHKNNIGPPNGQRYAPFVEEEWDDGLAMVPGAASMNNGSVDRILRLEGNGGVSCSEGR
NNVAQDSQSNNNKAPLDVNKLPIETQNLLAVCKRESQAEYPSPEKDDSKHMHVDEYPSPQ
TDNPKPLPQIYKRRRHNMNSNHSNVSGDSFPNSQDPCSSTITTAATTLPTTAVTTTTTNT
APKKHFLSALVEFSLLESLESKENHTSVPPVDFDMDSLETSVPPSCAKYIKHLQSEKQKL
GVEKETMRFELMSAQAMINILQSRVEIISRENEEMKRMMRNP

>CaNAC31

MAVYNSPGFRFHPTDEELVCFYLKRKLARNLPSCFDHLAVIDIYKFEPWDLPSLSKLKTK
DLEWYFFTVLDKKYGHGIRTNRATDRGYWKTTGKDRIVKNGEDTVGMKKTLVYHSGRAPH
GDRTNWVMHEYRMIDEELAKAGLQKDTYVACRIFEKSGSGPKNGEKYGAPFVEAEWEGVD
NRVDPLPAVDNEPLKQIVPSVPAIDNELLKQIVPVPAASGDDYVEADDLKQELETSVTVG
SADPPSNFYYGECSSHPQLSQTFVNDHMQLEASFGMYDPVLDQPDNMAGQYGQDTNLVQD
GDYGELNLGENPLNFNFASDDPDLYFDATGYLTSLGEEYMETNDVENLDEISPPEIDPSV
AAMLDEYLNYPAGDISKHISFDSPLSIGCESPIANPVQPFIEQNVEDEANGSSLANKQVS
EAQSSNEAIPTEDPEVSSWVSGDTNPFVKQANKLLASLPAAPAFASEFPTKEFALRIHPA
AQSSSSAHITAGMISITDITFRGNAMDWMVGKNGGFNTIMSTGFSQTDGNSATLEPISDL
VCSKAAFVLSHSWVFLTGFSVVVLSLSFKIGSLMYTGK

>CaNAC32

MDMESCVPPGFRFHPTEEELVGYYLNRKINSLKIDLDVIVEVDLYKIEPWDIQDKCKLGY
EQQNEWYFFSHKDKKYPTGTRTNRATAAGFWKATGRDKAVTSKNRIIGMRKTLVFYKGRA
PNGRKTDWIMHEYRHQTSEHAPPQEEGWVVCRAFRKPSPSHRPGFEPWCSSSSSQHQHQH
QQPHYFRDETYSTTRPLSITDIFHEGTSYSHPFSTEQQQFLSNQTLIMDKNLIELPQLEE
CNQLQHHNNEDCNEERSNNNIVDWKSLDNLFTSQFTDTTTANYFSHQNLPLMIPHSHHEL
QSSNQANHILGCFPDS


>CaNAC33

MGAVSESASADCFSEVMSSMPGFRFHPTDEELVMYFLKRKICGKKLKFNVICETDVYKWD
PEDLPGQSFLKTGDRVWFFFCHRDRKYPNGARSNRATRHGYWKATGKDRNIIFNSRSVGV
KKTLVFYVGRAPNGERTDWVMHEYTMDEEELKRCRDVKDYYALYKVFKKSGPGPKNGEQY
GAPFKEEDWADDDDVAFKINSPEKEAPNAVIDPLNGQMQPLFDDEIDEIIKEIFDVEPVP
DQQYVNGYVDFPQVVGEETQSMILGQFSEAVIFPEASGELQSCSQYYDVQPSFDFNQSIA
SPLHFSESPELASAPDIESDFQEDGFLEINDLIDTEPTFSNTEKPVENLQFEDGLSEFDL
HQDGEMLLRELGPVTGEPVSRAYMNNIGNNIENQSYQLTPYPEDTNQMVDEFWMHFERNT
LSPAEGYADSFSLTNPGVVCDSVSFPSESTENRRSTVEDVSTTSRFSSALWAFVESIPTT
PASAAENPLVGRALNRMSSFSRVKIKPTNIAAGNDTATVKRAGRKGVSFLFFPILIALCA
FLWVSIGNLRLLGRCISP

>CaNAC34

MALDSLPSRNLKPTDEELLKSFLYNKINNNPLPNHINILEHDLFGIKKNPWEIWEEFEAS
HSYCEKDLYFFTLLKKKSATSSRMVRTIGMGTWEAEDAKKDIVDKETCQLLGNKKRYRFE
KSGTIHDYEWILHEYKLDMSLINNFSAKNYVLCRFRKNNIRNKIKMPRKSTRTKNVGQHR
RRKIIIERPETTVSEKNNVWLEKNTDQRPRNQVDNGNNKIDVVNTINTSKSKYNKVEDEE
DGDQNIIEPELFAMQLKSVNEGCLIEEEDVPMISNDFYKYLLLENFYIK

>CaNAC35

MQKNKEVINKEGKGMEIEGIPLAKEETLPPGFRFHPTDEELITYYLVNKISDSDFSCKAI
GEVDLNKSEPWELPGKAKMGQKEWYFFSLRDRKYPTGVRTNRATNTGYWKTTGKDKEIFD
NVTSELVGMKKTLVFYKGRAPRGEKTNWVMHEYRIHSKSTYRTNKQDEWVVSRVFRKSVG
AKKYPSSNPTRATLNPYNINLEVGPSINMQPQPMMHLGDHSTTHFLYGRNYINTPDLVEV
NRVLRSSGVVPLPMQYSNLSSSPLGFTISGLNLNLGGASTQPSTQVHDFSSNMMTTTTTT
LGGENHNNNNNLGYGGEVNINANPNGNNRYMGMEHCVDLDNYWPSY

>CaNAC36

MAIAAATTSTSVSMSMSMSQSHSHEDITSNENNNNNKHVVDEDEDDDDDDHEHDVVMPGF
RFHPTEEELVEFYLRRKVEGKRFNVELITFLDLYRYDPWELPALAAIGEKEWYFYVPRDR
KYRNGDRPNRVTTSGYWKATGADRMIRTENFRSIGLKKTLVFYSGKAPKGIRTSWIMNEY
RLPQHETERYQKGEISLCRVYKRAGVEDHPSLPRCLPITRGNHSDHKNKQNEILGMGFVG
GQSNKAAATPTPTATASINNKMHEGSCSVGNSNSDHVTTVLGLSKYSTDPNYRAAEEEEE
ERLMMMQQQQVQYSAGGNSTLLLPLPAACFPLQNSAVSSNSSMMDDLNRLVSFNNNNQHH
YCYNPNPNPNPNHLSTLLMQPATLNSSVLPITPIPTNFSDRLWDWNPIPEDHPNPSFK

>CaNAC37

MARSWLIDIGGFAKKVKSTTLSSADQIKDCGAYRECPNCHYRIDNSDVSTEWPGFPLGIK
FDPSDVELLEHLAAKCGVGNTKPHMFIEEFIPTLEGNQGICYTHPENLPGAKKDGSSVHF
FHRTINAYSTGQRKRRKIHHHRGLTEEHVRWHKTGKTKAVFEDGVHKGFKKIMVLYIRSE
KESKSYKSNWKMHQYHLGINEDEKNGEYVVSKIFYKQVEKNEEKPLAEEPDNVTSRTSPT
TPKPNPPNPPRTGICVENDDNIDETALLLFAEDAKSIPGESHAPQSDIQDQENTPNPAWF
AGESQAIENSEYDGLDDILLCKEILDSFALFDDSGLDSITTNDFDYYENKMTGNGNVTST
SVLDTLELDTPPDFDLSNLTFCSQDSILDWMDRL

>CaNAC38

MMLAMEEVLCELSDHENKREQQGLPPGFRFHPTDEELITFYLASKVFNPTNFSSIVKFAE
VDLNRCEPWELPEVAKMGEREWYLFSLRDRKYPTGLRTNRATGAGYWKATGKDKEVYAAA
ACTGSLLGMKKTLVFYKGRAPRGEKTKWVMHEYRLGPHYSHIHTCKEEWVICRIFHKSVE
KRNSIIQVEGGSSNISLKKGSLLPPPPLLPNPTSFSLQNDQLTHSHFPLHAFQTSFPITH
DMSQQNFTLQKEPNIPKTEATFYELYQSQSIDDVVNLRWIDHINNFQSSFPLEMNDDDEL
IAFSSGADSNAEFRDMSTSTPFNSRLALDASVGIDSWSQPQLV

>CaNAC39
MENVKFIKNGISKLPPGFRFQPTDEELVFQYLKCKILSYQLPASIIPEINVCNYDPSDLP
GNYGEQDRYYFSSKETKYRNGNRMNRTTKSGYWKATGSEKKVIRISSSISNNNVGLAGIR
KSLVFYKGKSPNGSRSDWIMHEYRLVNVESNSSHQKYVKEIGDWVVCRIFMKKRRNVDKY
SVSIMNQPRFFDFMRVHNAAPGPMITSSSSSTSTEVSSSDQTSGYIC

>CaNAC40

MASELQLPPGFRFHPTDEELVMHYLCRKCTSQPISVPIIAEIDLYKYDPWDLPGMASYGE
KEWYFFSPRDRKYPNGSRPNRAAGSGYWKATGADKPIGHPKPVGIKKALVFYAGKAPKGD
KTNWIMHEYRLADVDRSIRRKNSLRLDDWVLCRIYNKKGTIEKQPNSGVINRKTDPSEIE
DKKPEILTRGSGLPPHPPPQATAGMRDYMYFDTSDSIPKLHTDSSCSEHVVSPEFASEVQ
SEPKWNEWEKHLEFPYNYVDTTLNSGFGSQFQSNNQMSPLQDMFMYLPKTF

>CaNAC41

MGSIDCGPSLGDDGMAVLSLNSLPLGFRFRPTDEELIDYYLRQKINGNGDEVWVIREIDV
CKWEPWDMPDLSVIRNKDPEWFFFCPQDRKYPNGHRLNRATTHGYWKATGKDRKIKSGTI
LIGMKKTLVFYSGRAPKGKRTNWVMHEYRPTLKELDGTNPGQNAYVLCRLFKKNDESLEV
SNCGEVEQTTSAPMAANYSPEEIQSDAAPIAVSTSQVTEDDKHQNVIPEISEETISNVIA
SVDCHSDGYDAHDIQNKLAELAAQEDQMNFDIYYNPKEGLLDDRLFSPALVHMPQEFHYE
ANNESDGGCGLQYGTNEINISDFLNSDLNWDQLPYVESGCHQQIFSLFNVKENGSGSDSD
VEVANMTCMPTTYPEEAIDRRIPCVTAPESRSTFDCSGDDDRKSKVVLLQNNFQMAYPSD
GNIGEVYNVVNGNIGEVYNVINGYEQPRNYNTVISGENGIVRRARPAQDEQWKTFSMQGT
AQRRLRLKKIEDCSNVTVKDGSCTQEQHNSKPIIPVKKEAAESRAADESATCTHASKQQK
VSLKSIYNIKISRRVTSAGSILGLRDFLLLAKAPFRSKASPKCTLWSSVFVVSASVLVSL
AVFTNIWGYIKI

>CaNAC42

MAETKLIPGFRFHPTDVELVMYFLKRKVMGRKFPYDVIAELDIYKYAPWDLPDKSLLKSG
DLKWYFFSPTGKKYSTGGRMNRATEIGYWKTTGKDRSIEHKNQVVGMIRTLVFHTGKSHK
GDRTDWVMHEFRLEDKYLTDKGIPQNSYVICRVFQKEGPGPRNGAQYGKPFNEKDWDSEE
EVDCPQPVPVAAVSAPAPILPSSCHISVANDMHPTTSGCIGLASSSYLSRVMPSGVTHPS
APSNQVDDDILSMLASFKDDNDTSAKNENNGSEKVDNSGQANNAEGAPYLDPNEIFESLG
DLDSLIGLDEGDGFSYGQKDEYTKNEMPSTSNVSLFCDPQHDFLELTDLEAPLF

>CaNAC43

MKGELELPPGFRFHPTDEELVNHYLCRKCAGQSISVPVVKEIDLYKFDPWQLPEIGFQSE
KEWYFFSPRDRKYPNGSRPNRAAGSGYWKATGADKPIGKPKAMGIKKALVFYAGKAPKGV
KTNWIMHEYRLANVDRSAGKKNNLRLDDWVLCRIYNKKGKIEKYNTVTPKVDSFYDHEEH
ERKPEIDKLGNYQLYMDSSDSIPRLHTDSCSSGHVVSPDVTCDKEVQSEVKWNEFGLQLD
DAFDFELNSLLDTSNLSLDLDGPFGTNFEYQMNHLSPLQDMFMYPNKPF

>CaNAC44

MAPVSLPPGFRFHPTDEELVSYYLKRKINGRRIELEIIPEVDLYKCEPWDLPGKSLLPGK
DLEWYFFSPRDRKYPNGSRTNRATKCGYWKATGKDRKVQSETRSVGMKKTLVYYRGRAPH
GTRTGWVMHEYRLDERECQNPSSGLQDAYALCRVFKKSTVIVPKLAHNLSITTDHSQGRG
DVLDTSNYNFMPCHSTSTQNLHGLLTRDNNSTWTQFLSDDLLNLPMSSSFPNYASTPYPP
SKVDIALECARMQHRFSMPPLEVEDFPQVSISELNSMCSGNRNETDILQEILSVAQASQD
LIHQSNYSHPFGGNQNDFTFMVGNNYNHVNDHMSSMRYDDKAWEDPNTRSIEIGDLDDEF
KAERMVENLRWVGMSSNDLEKSFMEEHQKVVPIEDISSFQTNRKENEVQVESEQQNINKE
LNDNDIENFSMGFINDDDPNENFINEGNIDYSNSTSYEVVEETKISHGMFVATRQVADTF
FHKITPSQTIKVQLNPIMENKQSIENKEITLIIPKNQGNSLLRKFKANFIGYMKKPTKTM
VNAIVFIFALFLVLCVYLKEQVEDWKPKPEYVKRKNCYEASNSMKRVINWNEQEKIWFIG
IKSGKGFDVVLKKIGIFLTISLAICTMWVNHIIASP

>CaNAC45

MMNKMSNVTCSDLIDAKLEEHQLCGSKQCPGCGHKFDQGGKPDWLGLPAGVKFDPTDQEL
IEHLEAKVESKNNIKSHPLIDEFILTIEGEDGICYTHPEKLPGVTRDGLSRHFFHRPSKA
YTTGTRKRRKIQTEECDIQGNTGGETRWHKTGKTRPVMVNGKQKGCKKILVLYTNFGKNR
KPEKTNWVMHQYHLGQHEEEKEGELVVSKIFYQTQPRQCNWSDHKSVTNINGEAIEGRRD
SGSGSCSNSSKEIVHHINHNHRDEMSAVPTPLTNFTSSLDIQHLKNDHFGFIPFRKSFDE
VGIGESCRGREIQQASGRCDEHEHEQINATTSFHMSRPSNPISTIISPPPLHHTSIILDD
NSYHVSTIMLQNDHFQQQQQQHKIGGSGRSASCLEEVIMGCTSSSSDIKEVLLHKENTII
YLFLTISCGKREREREREREGTLNFQYCIVFCVMMNE


>CaNAC46

MEKLNFIKNGVSRLPPGFRFQPTDEELVFQYLKCKIFSCPLPASIIPEINVCKYDPWDLP
GGCDEQERHFFSWKEAKYRNSKRMMSRTTKCGYWKATGSDKKISSPTCNGIVGLRKTLVF
YEGKSPNGSRTDWILHEYRLINVDTSPCNSTQNYYGNEIGDWVLCRLSMRKKSLESEYGS
TSTHHAPSKLMFDFMMVSNKTCSSTSSSCSSSSINNIEVSSNAPDHQQDYTHF

>CaNAC47

MQGALDLPPGFRFHPTDEELVNHYLCRKCSSQPIAVPIIKEIDLYKFDPWHLPEMALYGE
KEWYFFSPRDRKYPNGSRPNRAAGTGYWKATGADKPIGKPKPLGIKKALVFYAGKAPKGV
KTNWIMHEYRLANVDRTASKNNHNLRLDDWVLCRIYNKKGKIEKYNSVNKVSMFSEDVHF
ENEKKPQIKMNGQDDFRINDHTDTSDSVPRFHTDSSCSEHVVSPDVTCEKEVQSEPKWNE
FVLGPDPVSAFDFQLNFMDDGEDDPFAPNAQYQMNQLSGWQDLLMYLPK

>CaNAC48

MLGSENMKLPPGFYFSPTDEELVLHFLYSKASNLPYHPNIIPHLHLSHIDPWELYGKALS
SGNEHYLFTEVKESRSNENGYWKEIGATKAIVSAANNILGMKKYLVFTLREGTQTNWIME
EYHISSSTSPINLEESWSKWVLCKVYEKKMSQMSQQVCYSDEDVDSGTEVSWLDEVFMSL
DDDLDETSQPN

>CaNAC49

MGDNNNNVNLPPGFRFYPTDEELLVHFLHRKASLLPCHPDVIPDLDLFPYDPWELHGRAL
EEGNQWYYYSRRTQNRITNNGYWMPMGMEEQVVTTSTNKRLGIKKYYVFHLGQTPNGNKT
NWIMQEYRLSDSASSSRSSSSKRKSQPKSEHSRWVICRVYESDDDEDGDGTELSCLDEVF
LSLDDLDEVSLPN

>CaNAC50

MDSTDSSSCSPHPHLPPGFRFHPTDEELVVHYLKRKAASAPLPVAIIAEIDLYKFDPWEL
PSKASFGEQEWYFFSPRDRKYPNGARPNRAATSGYWKATGTDKPILTTDGHMKVGVKKAL
VFYGGKPPKGVKTNWIMHEYRLITDHNHNIHSYNATSKTPPLPADPPNLNKKNSLRLDDW
VLCRIYKKSNSSTMPRPPLMDQYDKELSMDHHHTMLPLTNMQQNNTKLPSSRSTSSYGLE
NDDNFFDGILAADQHQHQHHHEEMQNGCGSHDINSKNDNNDSFPMKRALTASSQFWNETG
SPGSSSSSKRFHGDLNSGNSNAEENNSFVSLLSQLPTTTTFHPNAILGDAVIRQQFQLPN
INWN

>CaNAC51

MTWCNDSDDQDRGIQLITSTFIRRIVSNETDLVTHDTKLPTQIRTLTCPSCGHNIQFQDQ
GGINDLPGLPAGVKFDPNDQEILQHLEAKIMFDVPKLHPLIDEFIPTLEGENGICYTHPE
KLPGVSKDGQIRHFFHRPSKAYTTGTRKRRKVQTDEEGSETRWHKTGKTRPIFISGVMKG
FKKILVLYTNYGRQKKPEKTNWVMHQYHLGNNEEEKDGELVVSKVFYQTQPRQCGNSNSI
MKDTYENRMSERNVQDDDNIVSKNVVPTMDYYNCDPFMNYEHVGHNLESSPQLISNLVMQ
GDDGSSFIRLAMDANKARLDRN

>CaNAC52

MESNTSSELPPGFRFHPTDEELIVYYLGNQATSKPCPASIIPEVDIYKFDPWELPGMLEN
EWYFFSPRERKYPNGVRPNRATLSGYWKATGTDKPINSGSKHIGVKKSLVFYKGRPPKGI
KTNWIMHEYRLVGSQKQTSKHIGSMRLDDWVLCRIYKKKHMGKTLQQNEDYPTLQFTDST
IVSNNDGEQETMNLPRTCSLTYLLDMNYFGPILSDGSTFDFQINNSNIGIDPFVKPQPVE
MTNHFYEADSRKY

>CaNAC53

MSEEMTLCSDIQNNDHSVTLEGRTDSLIRTCLTCGHHIKCQDQGGGINDLPGLPAGVKFD
PTDQEILEHLEAKVRSDIHKLHPLIDEFIPTLEGENGICYTHPEKLPGVSKDGLIRHFFH
RPSKAYTTGTRKRRKVHSDEDGSETRWHKTGKTRPVYNNSKLKGYKKILVLYTNYGKLRK
PEKTNWVMHQYHLGSNEEEKEGELVVSKVFYQTQPRQCGGGSLIKDSVSEKTIKGQNGNQ
VVINGKNSTNGFLDYYRSNFISFDQGNQHRDTNAQVINHFPVLEGAPNFNIP

>CaNAC54

MASMEDIMMSTEDITLPGFRFHPTEEELLDFYLKNMVVGKKLRFDVIGFLNIYHHDPREL
PDLAKVGEREWYFFVPRDKKHGSGGRPNRTTEKGFWKATGSDRKIVTLSDPKRIIGLRKT
LVFYEGRAPRGCKTDWVMNEYRLPDNSPLPKDIVLCKIYRKATSLKVLEQRAAEEEEMKQ
MVGSPASPPSSTDTISFSCIQQQDQHVSLPMLFLPKKESEAETEDMVSLSVSTPSHEKST
KNQMNGIVKDNNKKGICGTSLQLPFGKDNVPELQLPIATDWTQDTFWAQFNSPWLQNWTA
NSNILNF

>CaNAC55

MVEHIPTGYRFFPTEEELVGFYLNKKLQGEVNDIDKVIPVIDINGVEPWNLPSLAGELCR
DEKEQWFFFSPGQEREARGGRPNRTTACGYWKATGSPGYVYSSDNKVIGVKKSMVFYKGK
APSGNKTKWKMNEYRAIQISNQSNIATPQLRREFSLCRVYVISGSFRAFDRRPLEKERVY
ELQVRDIDQNQFGATCTHNQAAKMDALSSFEISQFEGLHSTHMLEDVGGSSSTNWTLNNN
DNDNDNDNDNDNDELLLQEPLWEWECENFKWP

>CaNAC56

MGSSNNGGVPPGFRFHPTDEELLHYYLKKKVSFQKFDMDVIREVDLNKMEPWDLQEKCKI
GSTPQNEWYFFSHKDRKYPTGSRTNRATNAGFWKATGRDKCIRNTYKKIGMRKTLVFYKG
RAPHGQKTDWIMHEYRLEDANDPTNEEGWVVCRVFKKKNLFKIGSEGVSTHNHQEQQQMN
INISSGTNPRSFMHRENQYLLHHQQQQNHSAGFEHEKPELSLHYQHLQQNSQYSSLFQSQ
SLLHAQKPLEVNFDYSYASSSLHSEQPITVKQLMTNPRDCESGSDGLRYQVSESGIEVGS
CEPPRSGGDGMNEWGMLDRLVNEDSTKLGGSRFEDANNHQINQLSLRGEMDIWGYGKQ

>CaNAC57

MRLPYIPRFFLPKTPLFMPFFSSLFSLLNLNTTTTTFTFSCFLTLISLHFFSFFHTSLTP
FLFFSLHFIELLRLTLEIMENVSVLSCKEDEKMDLPPGFRFHPTDEELISHYLYKKVIDS
NFSARAIGDVDLNKSEPWDLPWKAKMGEKEWYFFCVRDRKYPTGLRTNRATEAGYWKATG
KDKEIFRGKSLVGMKKTLVFYKGRAPKGEKSNWVMHEYRLEGKFSVHNLPKAAKNEWVIC
RVFQKSSAGKKTHISGIMRLDTLGNDLGSSVLPPLTDSSHSIGKIKQLNDSAYVPCFSNS
IDVQRNQGGIFDSFTNNNSIYGVSSNPLISTSSNPLYSNNNQVGCNLQFPSSVCGMQDQA
ILRALYENNGFKSERQQIVSVSKETDLTTDMNAETSSVVSNFDMSRRAFENNHHRPPPAA
VDLDGTLWNY

>CaNAC58

MGEALLPPGFRFHPTDEELVGYYLKRKVEGLEIELQVIPVINFYKFDPWELPEKSFLPKG
DSEWFFYCPRDRKHPNGSRTNRATKAGYWKVTGKERKVVSQCTSSTITGSRKTLVFYLGR
APLGDRTNWIMHEYRLTDDLVQHSSFLKGGLALCRVIKKNEKSKRAATSLVNRNEISMRF
SSEPFCKSGDVSSQASHLNNESGYSSPVTSPQNVAPIAEFNHVSKETNPSNFWISSDMIL
DSSKEFTQVKDVVSQYFPRCDSPRQSEHTTISPSLSYSNFNSEIEFVYNPSQIGYMSPYS
NQVNLMDNYGNWNVPYEGYDKLNLVSYQEPF

>CaNAC59

MKESVVPPEFRFHPTDGELVDYYLRKKVASQNIDLDVIKDIDLYRIEPWDLQERCKIGNE
EQHEWYFFSHKDKKYPTGTRTNRATMAGFWKATGRDKSVYERTKLIGMRKTLVFYKGRAP
NGHKTDWIMHEYRLQTLQNAPPQEEGWVVCKAFKKKTNVQTKTNERWDPSNLYDDEEVSG
IISRVDPIDLIIRQPQRISAQNFLYKQEIEPEANNLAFMMHSDQLLVPLPQLESPSLQSK
RQNSMSIISENNNNDDSLYSKIKSKEKVTDWRDLDKFVASQLSQEDRCHDHTSSDMALLL
LQSSRNEEENKFSSFFTTSPDCDFGICVFEKYINE

>CaNAC60

MYFFTRRSKKYENGQRPDRAVENRGFWKATGKENSVTNNDIKIGFKRTLVFYTGKQGKST
DSKQINWKTNWIMQEFTSTTTCNTDDWVLCKIYEHQYRKKCQITIQNNQNVIVSTNIDDT
SPNQSNQHFQVQQMQASLSYDMDFTPQYQLSQHFQTQQMQASLLCNMDFTPQCQLNQHFQ
AQEMQISLSSNIDFMPQYQHNQHFQTQQIQASLPTEIDFTPKYQVNQHFQVQQMQTPLSS
NMNFTSQYQLNQYFQAQQMQDSLSTDMASMPQYQPNQHSQAQTDEEYDDPFELIDFDR

>CaNAC61

MNNFSHVPPGFRFHPTDEELVDHYLRKKIASKRIDLDIIKDVDLYKIEPWDLQELCKIGS
DEQSEWYFFSHKDKKYPTSSRTNRATKAGFWKATGRDKAIYLKHCLIGMRKTLVFYKGRA
PNGQKSDWIMHEYRLETNQNGTTQEEGWAVCKVFKKRIVTTMRKMEDSPCWYDDQVSLIQ
ELESPNRVSHPYYASYQQNYPCKQELDQLQYINILNDANFLQLPQLESPKVPFQCSSSHN
SLIQEQHIQAQQQHCQQQNMQLFSGRNDVQDWRLLDKFVASQLSRDIQDASKETSSYCNV
DEQIANLLENDESKKSETGQEYATSTSNSSCQIDMWK
>CaNAC62

MGGASLPPGFRFHPTDEELIGYYLKRKVEGLEIELEVIPVIDFYKFDPWELPEKSFLPKR
DMEWFFFCPRDRKYPNGSRTNRATKAGYWKATGKDRKVVCESSPFISIETVTGYRKTLVF
YCGRAPLGDRTNWVMHEYRLCDDPSQGSEGAYALCRVIKKNEKSNDSQGQGRKKAKANDG
SNSISTNGNEVSSQASQLCSGSESLYSSPIDFSGNVPLMAGFEQASSDTNPSSFWLSPDM
ILDSSKQDYSQVQVQDVVGSFPQQHDLLSAMTPWQSFENTEISPSSSYSNFNAEIEFSDA
LSRIGCISPYSGQGSFMDLPYECYDQIHSFGDPKKF

>CaNAC63

MMESMESCVPPGFRFHPTDEELVGYYLRKKVASQKIDLDVIREIDLYRIEPWDLQERCRI
GYEEQNEWYFFSHKDKKYPTGTRTNRATMAGFWKATGRDKAVYDKMKLIGMRKTLVFYKG
RAPNGQKSDWIMHEYRLESDENGPPQEEGWVVCRAFKKRATNSQTKNTIERWDTSYFYEE
ASGMSSMVDPIDLISRQPQSFLAQSFNMCKQEIEAENNNNNNSLISCMHADQFIQLPQLE
SPSLPLVKRPSIVSLVSENNDDNNDDDQKRLLLLSNNNVTTITTTNNNNNNNNNNNQVTT
DWRALDKFVASQLSHEDEGVLSSFGTNILLPNSDMALMLMQGSRDEGNKFLNASSDCDIG
ICVFEK

>CaNAC64
MEENLPPGFRFHPTDEELITHYLTMKISDHSFTSKAVAVVDLNKSEPWDLPGKASMGEKE
WYFFSVRDRKYPTGLRTNRATESGYWKTTGKDKEIFRGGVLVGMKKTLVFYKGRAPRGEK
SNWVMHEYRLENKHHFRSSKDEWVVCRVFQKSIASKKPQQTSSSQPQSPCDTTSIVNEFG
DVELHHMDYSTNNISPQNFNTNNVNTNMNLTMNSWPSSSDVPHSLPISLPWPSSLLNPNN
INVNSLLLKALQLRSYQQQREVVAPTNIHHFAPYMSQVGVLSHSQLGNDQSNNDSNISAS
SSKVLECMPQHNQQEQPFNLDSIW

>CaNAC65

MSNNNNLSCVRNSDLIDAKLEEHQLCGSNHCPSCGHNFESKPDWLGLPAGVKFDPTDQEL
IEHLEAKVEAKKMKSHPLIDEFIPTIEGEDGICYTHPEKLPGVTKDGLSRHFFHRPSKAY
TTGTRKRRKIQNECDLQQGGETRWHKTGKTRPVMVNGKQKGCKKILVLYTNFGKNRKPEK
TNWVMHQYHLGQHEEEKEGELVVSKIFYQTQPRQCNWSDRSATTIGEGNGEPNYRDEMSN
VNVNVNVNGVTPTTSFNHTLDNVQAQQLKSDHFSFIPFRKSFYEVGIGEASTASEVQAAS
RSYEEEVHERHKQQNHHIATSAFHISPPPLHQTSIILDENSYQVSRIMLQNEHFQQQQHK
LGIGGRSTSCLEELIMGCTSTTHHIKDKEESSITNSQEAEWLKYSSYWPDPDNPDHHG
>CaNAC66
MSPVGLPPGFRFHPTDEELVNYYLKRKISGQEIELDIIPEVDLYKCEPWELAEKSFLPSRDPEWYFFGPRDRKYPNGFRTNRATRAGYWKSTGKDRRVSCQSRPIGMKKTLVYYRGRAPQGIRTDWVMHEYRLDDKDCEDNSGLQDTYALCRVFKKNGICSDMEEQQGQCSMSLIECSQTIINECETMSPDILGTSSSCLEEDDKDDSWMQFITDDAWYSSNAAMVGGEELSHVTFT	
>CaNAC67
MGVPEKDPLSQLSLPPGFRFFPTDEELLVQYLCRKVAGHHFSLPIIAEIDLYKFDPWVLPGKAIFGEKEWYFFSPRDRKYPNGSRPNRVAGSGYWKATGTDKIITTEGRKVGIKKALVFYIGKAPKGTKTNWIMHEYRLLDATRKHNLGSSKLDDWVLCRIYKKNSSSQKEVLTFSSKEYSNGSSPSSSSHVDDMVDSFPEIDDRSFALPRVTSLRMLQQEEKLGFHNMDAGIFADWVNPTDLESIPEFDSDYNTQGTFNFNFNDHTVPSVPPFGYMELTTACRKAAEEEVQSGMRTQRVTETSGLYQHNSNIFLSGLGDPFGFNYSGH	
>CaNAC68
MPENMSISVNGQSQVPPGFRFHPTEEELLQYYLRKKVSYEKIDLDVIRDVDLNKLEPWDIQEKCKIGTTPQNDWYFFSHKDKKYPTGTRTNRATAVGFWKATGRDKVIYSNGKRIGMRKTLVFYKGRAPHGQKSDWIMHEYRLDDNTTNDTNLVSNVIGDGGQEEGWVVCRIFKKKNHLKTLDSPLGSSISGDGRRNHLMYDPCDDEGALEQILRQMGRGCKEENYEANCNNNYERFARPFDHTNLNNMNGGNYNNERFMKLPSLESPKSTSMENNENNNNNGYHAIIQENEGSFTNNHNNMVNPLETSSSSTQMVSGLTNWVALDRLVASQLNGQTEATRQLACFNDPTIGYCTNDHHDLQFPTLRSSSSTSSISIHAKATTSTTTSTYITPSQDYTSEIDLWNFARSTSSLLSSSEPICHVSNTSV
>CaNAC69
MPENMSISVNGQSQVPPGFRFHPTEEELLQYYLRKKVSYEKIDLDVIRDVDLNKLEPWDIQEKCKIGTTPQNDWYFFSHKDKKYPTGTRTNRATAAGFWKATGRDKVIYSNGKRIGMRKTLVFYKGRAPHGQKSDWIMHEYRLDDNTTNDTNLVSNMIGDGGQEEGWVVCRIFKKKNHLKTLDSPLGSSISGDGRSHPMYDPCDDEGALEQILRQMGRGCKEENYEANCNNNYGRFARPFDHTNLNNMNGGNYNNERFMKLPSLESPKSTSMENNENNNNNGYHAIIQENEGSFTNNHNNMVNPLETSSSSTQMVSGLTNWVALDRLVASQLNGQTEATRQLACFNDPTIGYCTNDHHDLQFPTLRSSSSTSSISIHAKATTSTTTSTYITPSQDYTSEIDLWNFARSTSSLLSSSEPICHVSNTSV	
>CaNAC70
MEERNGGDKLDEVMLPGFRFHPTDEELVGFYLKRKIQQRPLAIELIKQLDIYKFDPWDLPKLASTGEKEWYFYCPRDRKYRNSARPNRVTRAGFWKATGTDRPIYSSEGSKCIGLKKSLVFYKGRAAKGVKTDWMMHEFRLPSLNDSSSSPKKYVDKTIPANESWAICRIFKKTNATAQRALSHSWVPPLLETSTSNLLTNDGNNNQFCSQNMMLLAKKPNFTSQFCATNNHNTTSSNTTLCPLNIPSYNNKPIIDPLIYTPLYKLPISNDQNLNNLSTHGLLFSSPLETSSTNCNKTSSMDVSSLLLGMSSSSFLEGATTSNYIGSLQDHYNNNNNNGYPIMANNINPNVNVAGVNDEELERERSIGFSYSMPFNVGDAWKSSLVWDTSSCTSDEPSGYSTTKCYT
>CaNAC71
MGAVDCLPPSHAEEMAVLSLNKLPLGFRFRPTDEELIDFYLRLKINGNGDEVWVIREIDVCKWEPWDLPDLSVVRNKDPEWFFFCPQDRKYPNGSRLNRATNHGYWKATGKDRKIKSGPTLIGMKKTLVFHAGRAPKGKRTNWVMHEYRPTLKELDGTNPGQNPYVLCRLFKKQDESIESSNCGEVEQTASTPMTANYSPEEIQSDPNVVPGASSSQVTEDYKHLAAIPENSEEAISNFLTPADCYRDACNASDAQNQIVTTAAEEDQLFNLDIFDSPQFEQLDDKLFSPVHAHFPQDFFYETNNEVEFQYGTNETDVSDFFNSAVNWDEVSREASSSLELKSDLLHVKDNGSCSDSEVEMANMMHLQPLHAYPEGVTPTPQNSDAGLFYSSFFSTGPTPTVVDECMGQTPAVVDESMGQTPAVVDGYEQMRNLDTVVQGDTGIRIRTRQRRNEQPITNPVMPAQGSAPRRILLGGFVTHSLVSEETTKDRSSAPVNHNSETIISREKQTSEKHAAGESATDTNINDVDELEKTSLASDDTRKISQQHVTTTESILEWKDSLLGRRVCYSSKISSNRAMWSSVLAVSAIVLVSLVLFVNIWGYLRIETAH
