# Supplementary material
Source: publisher figshare collection journal article supplement (https://plos.figshare.com/articles/dataset/_/1263184)
Supplement: Supplementary file 1 [file 1 › Figure_S1.pdf]

**A**

CaNAC60 : ----- : -

**B** **C**

1000

# NAC domain

D

E

|          | 240   | *            | 260               | *          | 280           | *              | 300                   | *   | 320            | *                  | 340               | *                                 |       |
|----------|-------|--------------|-------------------|------------|---------------|----------------|-----------------------|-----|----------------|--------------------|-------------------|-----------------------------------|-------|
| CaNAC01  | ---   | RIGIKKHFVHME | ESDS              | ---        | VGKTNWIMHEFR  | SHSSTN         | ---                   | --- | ---            | ---                | ---               | ---                               | : 139 |
| CaNAC49  | ---   | RIGIKKYYVHLC | QTE               | ---        | NGKTNWIMCEYR  | SDSASS         | ---                   | --- | ---            | ---                | ---               | ---                               | : 135 |
| CaNAC48  | ---   | ILGMKKYLVET  | REGT              | ---        | QTNWIMCEYH    | SSSTSP         | ---                   | --- | ---            | ---                | ---               | ---                               | : 130 |
| CaNAC17  | ---   | ILGLRRRYRE   | EKSDTV            | ---        | HDNCGWILHEKK  | DASLIAN        | ---                   | --- | PSAENVVLCFR    | FRKNVKKNPVSTRNRIAK | ---               | ---                               | : 173 |
| CaNAC34  | ---   | ILGNKKRYRE   | EKSGTI            | ---        | HDYEWILHEKK   | DMSLINN        | ---                   | --- | PSAKNVLCFR     | FRKNKNIRN          | ---               | ---                               | : 162 |
| CaNAC28  | ---   | HLGMKKRAMVEY | SGRAP             | ---        | NGKRTWIMNEYH  | AIQDQPPSSSNKL  | ---                   | --- | APMLRNEMSLCRVY | KKSK-CLRAFDRRP     | ---               | ---                               | : 174 |
| CaNAC55  | ---   | KVIGVKRSMVEY | KGRAP             | ---        | SGNKRWRKNNEYH | AIQIS-NQSNIA   | ---                   | --- | TPQLRRRESLCRVY | VISG-SFRAFDRRP     | ---               | ---                               | : 173 |
| CaNAC54  | ---   | RIILGLRRKLV  | VEYBGRAP          | ---        | RCCKRTWIMNEYH | PDNS           | ---                   | --- | PLPKDIVLCRIYK  | RAT-SLKVLQRA       | ---               | ---                               | : 172 |
| CaNAC41  | ---   | ILGMKKKLV    | VEYSGRAP          | ---        | KCKRTNWIMHEFR | PTLKELDGTN     | ---                   | --- | PGQNAVLCRI     | LBKKNDESLEVSNCGE   | ---               | ---                               | : 185 |
| CaNAC71  | ---   | ILGMKKKLV    | VEYHAGRAP         | ---        | KCKRTNWIMHEFR | PTLKELDGTN     | ---                   | --- | PGQNAVLCRI     | LBKKNDESLEVSNCGE   | ---               | ---                               | : 185 |
| CaNAC02  | KH    | ---          | IGVKKRLVEY        | SGRPP      | ---           | KCKRTNWIMNEYH  | IDTT                  | --- | TKSFM          | ---                | LRGSMRLDENVLCR    | VRHGGYSSKNLSNENQENPCEPNI          | : 185 |
| CaNAC27  | KS    | ---          | IGVKKSLVEYK       | GRPL       | ---           | KCSRTWIMNEYH   | IDS                   | --- | ISNSN          | ---                | HSGSMRLDENVLCR    | VQRQTGSPR-SSCEDSN                 | : 178 |
| CaNAC05  | QR    | ---          | VGVKRALVEY        | GKGRPP     | ---           | RCIKTNWIMNEYH  | ADNK                  | --- | PNNRPPGGDLG    | ---                | NKKNLRLDDAVLCRIYK | KNNSNTHWSP-VEHREDSDMD             | : 193 |
| CaNAC50  | MK    | ---          | VGVKRALVEY        | GKGRPP     | ---           | KCKVTNWIMHEYRI | ITDHNHNIHSYNATS       | --- | TKTTPPLPADPPN  | ---                | LKKNLRLDDAVLCRIYK | KNNSSTMPRPPLMDQYDKLELSDMD         | : 210 |
| CaNAC16  | KH    | ---          | IGVKKRALVEYK      | GRPP       | ---           | KGLKTNWIMHEYRI | IGSR                  | --- | KQANR          | ---                | QIGSMRLDDAVLCRIYK | KNNTKTSFD-TRE                     | : 172 |
| CaNAC52  | KH    | ---          | IGVKKSLVEYK       | GRPP       | ---           | KCKTNWIMHEYRI  | VGSR                  | --- | KQTSK          | ---                | HIGSMRLDDAVLCRIYK | KNHMGKTLQ-QNE                     | : 169 |
| CaNAC029 | SN    | ---          | VGVKRALVEYK       | GRPP       | ---           | KCKTNWIMHEYRI  | HDSSR                 | --- | KASTK          | ---                | RNGSMRLDDAVLCRIYK | KNKSKALLN-EQE                     | : 172 |
| CaNAC24  | RRS   | ---          | HDNIIIGVKKRALVEYK | GRPP       | ---           | KCKVTNWIMHEYRI | VDNN                  | --- | KPIKL          | ---                | KDSSMRLDDAVLCRIYK | KNKSKALLS-EAET                    | : 181 |
| CaNAC06  | RK    | ---          | VGIKKRALVEYV      | GRAP       | ---           | KCKTNWIMHEYRI  | LDSSR                 | --- | NNTG           | ---                | TKLDDAVLCRIYK     | KNSSAQK-AIPNGIVSSREYTG            | : 182 |
| CaNAC67  | RK    | ---          | VGIKKRALVEYI      | GRAP       | ---           | KCKTNWIMHEYRI  | LDATRK                | --- | NHLGS          | ---                | SKLDDAVLCRIYK     | KNSSSQK-EVLT-FSSKE                | : 179 |
| CaNAC019 | QR    | ---          | VGIKKRALVEYI      | GRAP       | ---           | KCKTNWIMHEYRI  | IEPSR                 | --- | RNGS           | ---                | TKLDDAVLCRIYK     | KNQSSAQKQVYDNGIANAREFSN           | : 183 |
| CaNAC55  | RR    | ---          | VGIKKRALVEYI      | GRAP       | ---           | KCKTNWIMHEYRI  | IEPSR                 | --- | RNGS           | ---                | TKLDDAVLCRIYK     | KNQSSAQKQVYDNGIANAREFSN           | : 183 |
| CaNAC072 | RR    | ---          | VGIKKRALVEYI      | GRAP       | ---           | KCKTNWIMHEYRI  | IEHRS                 | --- | SHGS           | ---                | SKLDDAVLCRIYK     | KNQSSAQKQVYDNGIANAREFSN           | : 200 |
| CaNAC40  | KP    | ---          | VGIKKRALVEYI      | GRAP       | ---           | KCKTNWIMHEYRI  | ADVDRS                | --- | IRRK           | ---                | NSLRLDDAVLCRIYK   | KNKGTIERQ-PNSGVINRRTDP            | : 176 |
| CaNAC40  | KP    | ---          | VGIKKRALVEYI      | GRAP       | ---           | KCKTNWIMHEYRI  | ADVDRS                | --- | VRKKK          | ---                | NSLRLDDAVLCRIYK   | KNKGTIERQ-PNSGVINRRTDP            | : 174 |
| CaNAC6   | KP    | ---          | VGIKKRALVEYI      | GRAP       | ---           | KCKTNWIMHEYRI  | ADVDRS                | --- | ARKK           | ---                | NSLRLDDAVLCRIYK   | KNKGTIERQ-PNSGVINRRTDP            | : 179 |
| CaNAC43  | KA    | ---          | MGIKKRALVEYI      | GRAP       | ---           | KCKVTNWIMHEYRI | ADVDRS                | --- | AGKKN          | ---                | NLRLDDAVLCRIYK    | KNKGTIERQ-PNSGVINRRTDP            | : 176 |
| CaNAC47  | KP    | ---          | LGIKKRALVEYI      | GRAP       | ---           | KCKVTNWIMHEYRI | ADVDRS                | --- | ASKNNH         | ---                | NLRLDDAVLCRIYK    | KNKGTIERQ-PNSGVINRRTDP            | : 178 |
| CaNAC2   | KT    | ---          | LGIKKRALVEYI      | GRAP       | ---           | KCKTNWIMHEYRI  | ADVDRS                | --- | ASVNNK         | ---                | NLRLDDAVLCRIYK    | KNKGTIERQ-PNSGVINRRTDP            | : 166 |
| CaNAC1   | RT    | ---          | LGIKKRALVEYI      | GRAP       | ---           | KCKTNWIMHEYRI  | ADVDRS                | --- | AAGAKK         | ---                | GSRLDDAVLCRIYK    | KNKGTIERQ-PNSGVINRRTDP            | : 191 |
| CaNAC39  | SNN   | ---          | NVGLAGIRKSLVEYK   | GRPP       | ---           | NGSRSDWIMHEYRI | IVNVES                | --- | NSSHQKY        | ---                | VKEIGDVL          | CRIMKRRNRVDKY                     | : 180 |
| CaNAC46  | CN    | ---          | GIYGLRKLVEYK      | GRPP       | ---           | NGSRSDWIMHEYRI | IVNVES                | --- | CNSTQNY        | ---                | GNEIGDVL          | CRIMKRRNRVDKY                     | : 179 |
| CaNAC21  | SN    | ---          | VVGMKKKLV         | VEYKGRPP   | ---           | HCSRTWIMHEYRI  | TNHS                  | --- | SLKQN          | ---                | VVGRILH           | KRGGAKNNGGR                       | : 168 |
| CaNAC19  | Q     | ---          | AVGMKKKLV         | VEYBGRAP   | ---           | HCKRTNWIMHEYRI | HDRECEP-TS            | --- | ---            | ---                | ALQDAALCRV        | IKNTNVIYKPVKGGQYGNLTTHDNQITTVSQ   | : 183 |
| CaNAC44  | R     | ---          | SVGMKKKLV         | VEYBGRAP   | ---           | HCKRTNWIMHEYRI | HDRECEP-TS            | --- | ---            | ---                | GLQDAALCRV        | IKNTNVIYKPVKGGQYGNLTTHDNQITTVSQ   | : 177 |
| CaNAC66  | R     | ---          | PLGMKKKLV         | VEYBGRAP   | ---           | HCKRTNWIMHEYRI | HDRECEP-TS            | --- | ---            | ---                | GLQDAALCRV        | IKNTNVIYKPVKGGQYGNLTTHDNQITTVSQ   | : 168 |
| CaNAC07  | R     | ---          | QVGMKKKLV         | VEYBGRAP   | ---           | HCKRTNWIMHEYRI | HDRECEP-TS            | --- | ---            | ---                | GLQDAALCRV        | IKNTNVIYKPVKGGQYGNLTTHDNQITTVSQ   | : 179 |
| CaNAC58  | T     | ---          | SSSTITGSRKLV      | VEYBGRAP   | ---           | LDRTNWIMHEYRI  | TD-DLVQSS             | --- | ---            | ---                | FLKGGALALCRV      | IKNTNVIYKPVKGGQYGNLTTHDNQITTVSQ   | : 180 |
| CaNAC62  | SPFIS | ---          | ITETVTCRKLVEYB    | GRAP       | ---           | LDRTNWIMHEYRI  | TD-DLVQSS             | --- | ---            | ---                | EGALALCRV         | IKNTNVIYKPVKGGQYGNLTTHDNQITTVSQ   | : 179 |
| CaNAC30  | R     | ---          | TVGLKKLV          | VEYHSGRAP  | ---           | DEKRTNWIMHEYRI | VDDEMERAGSG           | --- | ---            | ---                | PSQPQDAALCRV      | IKNTNVIYKPVKGGQYGNLTTHDNQITTVSQ   | : 211 |
| CaNAC42  | Q     | ---          | VGMIRALV          | VEYHSGRAP  | ---           | DEKRTNWIMHEYRI | VDDEMERAGSG           | --- | ---            | ---                | IPQNSALCRV        | IKNTNVIYKPVKGGQYGNLTTHDNQITTVSQ   | : 178 |
| CaNAC31  | D     | ---          | TVGMKKKLV         | VEYHSGRAP  | ---           | DEKRTNWIMHEYRI | IDEELAKGR             | --- | ---            | ---                | LQKTDALCRV        | IKNTNVIYKPVKGGQYGNLTTHDNQITTVSQ   | : 183 |
| CaNAC33  | R     | ---          | SVGVKRALVEYB      | GRAP       | ---           | NGERTNWIMHEYRI | IDEELAKGR             | --- | ---            | ---                | DVKDYALCRV        | IKNTNVIYKPVKGGQYGNLTTHDNQITTVSQ   | : 196 |
| CaNAC68  | ---   | NGKRI        | GMKKKLV           | VEYBGRAP   | ---           | HCKSDWIMHEYRI  | DDNTTNDTNLV           | --- | ---            | ---                | SNVIGDGGQEGV      | VVCRIBKKNHLKLDSPGLGSSISGDGRNHL    | : 199 |
| CaNAC69  | ---   | NGKRI        | GMKKKLV           | VEYBGRAP   | ---           | HCKSDWIMHEYRI  | DDNTTNDTNLV           | --- | ---            | ---                | SNVIGDGGQEGV      | VVCRIBKKNHLKLDSPGLGSSISGDGRNHL    | : 198 |
| CaNAC08  | ---   | NSKRI        | GMKKKLV           | VEYBGRAP   | ---           | HCKSDWIMHEYRI  | DDNTTNDTNLV           | --- | ---            | ---                | AEVQEDGV          | VVCRIBKKNHLKLDSPGLGSSISGDGRNHL    | : 171 |
| CaNAC56  | ---   | TYKKI        | GMKKKLV           | VEYBGRAP   | ---           | HCKSDWIMHEYRI  | DDNTTNDTNLV           | --- | ---            | ---                | DPTNEEGV          | VVCRIBKKNHLKLDSPGLGSSISGDGRNHL    | : 169 |
| CaNAC59  | ---   | RTKLI        | GMKKKLV           | VEYBGRAP   | ---           | HCKSDWIMHEYRI  | DDNTTNDTNLV           | --- | ---            | ---                | APPQEEGV          | VVCRIBKKNHLKLDSPGLGSSISGDGRNHL    | : 170 |
| CaNAC63  | ---   | KMKLI        | GMKKKLV           | VEYBGRAP   | ---           | NGKSDWIMHEYRI  | IDEELAKGR             | --- | ---            | ---                | GPPQEEGV          | VVCRIBKKNHLKLDSPGLGSSISGDGRNHL    | : 175 |
| CaNAC61  | ---   | KHCLI        | GMKKKLV           | VEYBGRAP   | ---           | NGKSDWIMHEYRI  | IDEELAKGR             | --- | ---            | ---                | GTTQEEGV          | VVCRIBKKNHLKLDSPGLGSSISGDGRNHL    | : 168 |
| CaNAC32  | ---   | KNRII        | GMKKKLV           | VEYBGRAP   | ---           | NGKSDWIMHEYRI  | IDEELAKGR             | --- | ---            | ---                | APPQEEGV          | VVCRIBKKNHLKLDSPGLGSSISGDGRNHL    | : 171 |
| CaNAC35  | ---   | TSELI        | GMKKKLV           | VEYBGRAP   | ---           | RCCKTNWIMHEYRI | HSK-STYR              | --- | ---            | ---                | TKNQDAV           | VVCRIBKKNHLKLDSPGLGSSISGDGRNHL    | : 178 |
| CaNAC64  | ---   | GGVLI        | GMKKKLV           | VEYBGRAP   | ---           | RCCKSNWIMHEYRI | ENK-HHFR              | --- | ---            | ---                | SSK-DEAV          | VVCRIBKKNHLKLDSPGLGSSISGDGRNHL    | : 152 |
| CaNAC09  | ---   | TSYLI        | GMKKKLV           | VEYBGRAP   | ---           | RCCKSNWIMHEYRI | ENK-HHFR              | --- | ---            | ---                | SRNSKDEAV         | VVCRIBKKNHLKLDSPGLGSSISGDGRNHL    | : 192 |
| CaNAC13  | ---   | EKTLI        | GMKKKLV           | VEYBGRAP   | ---           | KCKRTNWIMHEYRI | EDK-YSLQNT            | --- | ---            | ---                | SKRTMKES          | ICORVEK                           | : 170 |
| CaNAC22  | ---   | ENALI        | GMKKKLV           | VEYBGRAP   | ---           | KCKRTNWIMHEYRI | EDK-YSLQNT            | --- | ---            | ---                | SKPGMGAV          | ICORVEK                           | : 170 |
| CaNAC57  | ---   | GKSLI        | GMKKKLV           | VEYBGRAP   | ---           | KCKBSNWIMHEYRI | EGK-FSVHNL            | --- | ---            | ---                | PKAANKV           | ICORVEK                           | : 245 |
| CaNAC14  | ---   | SNQLI        | GMKKKLV           | VEYBGRAP   | ---           | KCKBSNWIMHEYRI | EGK-FATCNL            | --- | ---            | ---                | PKDSKDEAV         | VVCRIBKKNHLKLDSPGLGSSISGDGRNHL    | : 169 |
| CaNAC25  | ---   | GN-LI        | GMKKKLV           | VEYBGRAP   | ---           | KCKBSNWIMHEYRI | EGK-FANYHL            | --- | ---            | ---                | PKAANKV           | ICORVEK                           | : 168 |
| CaNAC38  | ---   | CTGSLI       | GMKKKLV           | VEYBGRAP   | ---           | RCCKTNWIMHEYRI | GPH                   | --- | ---            | ---                | IHTCKEAV          | VVCRIBKKNHLKLDSPGLGSSISGDGRNHL    | : 178 |
| CaNAC26  | ---   | TQEV         | GMKKKLV           | VEYBGRAP   | ---           | NGIKGWMHEYRI   | ETP-HMPP              | --- | ---            | ---                | KEDAVLCR          | VEYK                              | : 157 |
| CaNAC29  | ---   | TREV         | GMKKKLV           | VEYBGRAP   | ---           | NGIKGWMHEYRI   | ETP-HMPP              | --- | ---            | ---                | KEDAVLCR          | VEYK                              | : 157 |
| CaNAC11  | ---   | KGSLI        | GMKKKLV           | VEYBGRAP   | ---           | KCKRTWIMHEYRI  | ETP-HMPP              | --- | ---            | ---                | ISSSKED           | VVCRIBKKNHLKLDSPGLGSSISGDGRNHL    | : 159 |
| CaNAC10  | ---   | GEGND        | CVGLKKLV          | VEYBGRAP   | ---           | KCKRTWIMHEYRI  | ETP-HMPP              | --- | ---            | ---                | DAHIAQEA          | ILTLCRIBKKNHLKLDSPGLGSSISGDGRNHL  | : 185 |
| CaNAC20  | ---   | ESHEC        | IGLKKLV           | VEYBGRAP   | ---           | KCKRTWIMHEYRI  | ETP-HMPP              | --- | ---            | ---                | HDVQEA            | ILTLCRIBKKNHLKLDSPGLGSSISGDGRNHL  | : 178 |
| CaNAC15  | ---   | SEGSK        | ICLKKLV           | VEYBGRAP   | ---           | KCKRTWIMHEYRI  | ETP-HMPP              | --- | ---            | ---                | IDKTIPTNES        | ALCRIBKKNHLKLDSPGLGSSISGDGRNHL    | : 194 |
| CaNAC70  | ---   | SEGSK        | ICLKKLV           | VEYBGRAP   | ---           | KCKRTWIMHEYRI  | ETP-HMPP              | --- | ---            | ---                | VDKTIPTNES        | ALCRIBKKNHLKLDSPGLGSSISGDGRNHL    | : 195 |
| CaNAC12  | ---   | SDG-C        | IGLKKLV           | VEYBGRAP   | ---           | NGKRTWIMHEYRI  | ETP-HMPP              | --- | ---            | ---                | FDKSFSPNDS        | ALCRIBKKNHLKLDSPGLGSSISGDGRNHL    | : 205 |
| CaNAC36  | ---   | ENFRS        | IGLKKLV           | VEYBGRAP   | ---           | KCKRTWIMHEYRI  | ETP-HMPP              | --- | ---            | ---                | SLCRVYKRA         | GVEDHPSLECLPITRGNHSDHKNKQNEILGMGF | : 238 |
| CaNAC03  | ---   | KLKCY        | KKRLV             | ILNTNYRQ   | ---           | KKPKTNWIMHEYRI | EQH-GNNEE             | --- | ---            | ---                | KEGELV            | SKVYQTPRQCGG                      | : 216 |
| CaNAC53  | ---   | KLKCY        | KKRLV             | ILNTNYGKL  | ---           | KKPKTNWIMHEYRI | EQH-GNNEE             | --- | ---            | ---                | KEGELV            | SKVYQTPRQCGG                      | : 221 |
| CaNAC51  | ---   | VMKCY        | KKRLV             | ILNTNYGRQ  | ---           | KKPKTNWIMHEYRI | EQH-GNNEE             | --- | ---            | ---                | KDGEV             | SKVYQTPRQCGG                      | : 238 |
| CaNAC45  | ---   | KQKCY        | KKRLV             | ILNTNYFGKN | ---           | KKPKTNWIMHEYRI | EQH-GNNEE             | --- | ---            | ---                | KEGELV            | SKVYQTPRQCGG                      | : 223 |
| CaNAC65  | ---   | KQKCY        | KKRLV             | ILNTNYFGKN | ---           | KKPKTNWIMHEYRI | EQH-GNNEE             | --- | ---            | ---                | KEGELV            | SKVYQTPRQCGG                      | : 219 |
| CaNAC18  | ---   | VQKCY        | KKRLV             | ILNTNYVGG  | ---           | KKPKTNWIMHEYRI | EQH-GNNEE             | --- | ---            | ---                | NDGEV             | SKVYQTPRQCGG                      | : 226 |
| CaNAC37  | ---   | VHKCY        | KKRLV             | ILNTNYSEKE | ---           | KKPKTNWIMHEYRI | EQH-GNNEE             | --- | ---            | ---                | KNGEY             | SKVYQTPRQCGG                      | : 222 |
| CaNAC04  | ---   | NVIG         | GMKKKLV           | VEYBGRAP   | ---           | KCKRTWIMHEYRI  | SDRSPDVLVLCRLKKNTEFRQ | --- | ---            | ---                | DASNRASSSH        | NAVNSHESDCAASEGGIDQRGVCEQDKEVD    | : 206 |
| CaNAC23  | ---   | FFYGR        | KKRLV             | VEYBGRAP   | ---           | QHTIMHEYRI     | ETP-HMPP              | --- | ---            | ---                | TKISAVGA          | YRIKLEKPLRNN                      | : 172 |
| CaNAC60  | ---   | DILIG        | GMKKKLV           | VEYBGRAP   | ---           | QHTIMHEYRI     | ETP-HMPP              | --- | ---            | ---                | TDDVLCR           | IEHGYRKKQITIQN                    | : 107 |

NLS

[illegible]

|          | 480                                                                                             | * | 500 | * | 520 | * | 540 | * | 560                                                  | * | 580 | * |       |
|----------|-------------------------------------------------------------------------------------------------|---|-----|---|-----|---|-----|---|------------------------------------------------------|---|-----|---|-------|
| CaNAC01  | : SSSSSSIKSPQIKDYSKWVICRV                                                                       |   |     |   |     |   |     |   | -YESKG                                               |   |     |   | : 168 |
| CaNAC49  | : SRSSSSRRKSQPKSEHSRWVICRV                                                                      |   |     |   |     |   |     |   | -YESDD                                               |   |     |   | : 164 |
| CaNAC48  | : INLEES                                                                                        |   |     |   |     |   |     |   | -YKKMSQMSQ                                           |   |     |   | : 155 |
| CaNAC17  | : LQRNNTSMGNTGRGRKKRKTVAEC                                                                      |   |     |   |     |   |     |   | -EATTISGNNNNNVVVREYTIYEPI                            |   |     |   | : 227 |
| CaNAC34  | : MPRKSTRKXNVQGHRRRRIIIR                                                                        |   |     |   |     |   |     |   | -PETTVSEKNN                                          |   |     |   | : 198 |
| CaNAC28  | : RR                                                                                            |   |     |   |     |   |     |   | -DSS--SSLDHGQTSNEVG                                  |   |     |   | : 221 |
| CaNAC55  | : KERVYELQVRDIDQNGFGATCTHNQAARMDALSSF                                                           |   |     |   |     |   |     |   | -EISQFEGHLSTHMLDVG                                   |   |     |   | : 228 |
| CaNAC54  | : EEEMKQMGVSPASPPSSTDTISFSCIQQDQHVSLPMLFLPK                                                     |   |     |   |     |   |     |   | -KESEATEDMVSLSVSTPSHEKS                              |   |     |   | : 239 |
| CaNAC41  | : QTTAPMAANYSPFEEIQSDAAPIA-VSTSQTVEDDKHQNVIP                                                    |   |     |   |     |   |     |   | -EISEETISNVIASVDCSDGSDYDA                            |   |     |   | : 251 |
| CaNAC71  | : QTASTPMTANYSPFEEIQSDPNVVGASSSQVTEYKHLAIP                                                      |   |     |   |     |   |     |   | -ENSEEAIISNFLTTPADCYRDACNA                           |   |     |   | : 252 |
| CaNAC02  | : VNLQTS-EEHPTNTKFRADMITDY                                                                      |   |     |   |     |   |     |   | -QYK--DYQIIASILVGGVIPPNE                             |   |     |   | : 230 |
| CaNAC27  | : LSFETSSHQFQMNNDNSSPEPVKNY                                                                     |   |     |   |     |   |     |   | -VQRQNEYPMPLPYILASKSVLPN                             |   |     |   | : 225 |
| CaNAC05  | : PPSINVQGMNARFHFSCRMSNSYNN                                                                     |   |     |   |     |   |     |   | -TLLENDQNLLGMMLSNNNNNNN                              |   |     |   | : 246 |
| CaNAC50  | : LPLTNMQNNTKLPSSRSTSSYG                                                                        |   |     |   |     |   |     |   | -LENDDNFFDGILAADQHQHQH                               |   |     |   | : 259 |
| CaNAC16  | : YP-TNQINVSPRN-DDDSEQ                                                                          |   |     |   |     |   |     |   | -ELMKFS                                              |   |     |   | : 203 |
| CaNAC52  | : YP-TLQFTDSTIVSNNDGEQ                                                                          |   |     |   |     |   |     |   | -ETMNL                                               |   |     |   | : 201 |
| CaNAC29  | : FMDEVLMEDETRVVVNEAERTTEE                                                                      |   |     |   |     |   |     |   | -EIMMNTSMKLP                                         |   |     |   | : 214 |
| CaNAC24  | : QAKETQIKDTLQITKNSTSPNQ                                                                        |   |     |   |     |   |     |   | -TMSQKMSFSNLLDAMDYSMLS                               |   |     |   | : 234 |
| CaNAC06  | : DSSAS                                                                                         |   |     |   |     |   |     |   | -EIDDRCFMLPR--VNSLR-TM                               |   |     |   | : 221 |
| CaNAC67  | : GSSPS                                                                                         |   |     |   |     |   |     |   | -EIDDRSFALPR--VTSLR-ML                               |   |     |   | : 218 |
| CaNAC019 | : SSTTS                                                                                         |   |     |   |     |   |     |   | -EIDNRNPFQSN--PNRIS-SL                               |   |     |   | : 223 |
| CaNAC055 | : SSTSS                                                                                         |   |     |   |     |   |     |   | -EIDNRSLGFAAGSSNALPHSH                               |   |     |   | : 224 |
| CaNAC072 | : -SSSS                                                                                         |   |     |   |     |   |     |   | -EKDQSFNLPR                                          |   |     |   | : 230 |
| CaNAC40  | : EDKKPEILLTRGSGCLPPHPPPQ                                                                       |   |     |   |     |   |     |   | -ATAGMRDYMYPDT-SDSIPKLHT-DSSCS                       |   |     |   | : 227 |
| ATAF1    | : MEEKP                                                                                         |   |     |   |     |   |     |   | -QTS--EFAYFDT-SDSVPKLHTDSSCS                         |   |     |   | : 219 |
| CaNAC6   | : VQRKP                                                                                         |   |     |   |     |   |     |   | -GPAPFDLAAYYDRPSDSMPRLHA-DSSCS                       |   |     |   | : 234 |
| CaNAC43  | : HERKP                                                                                         |   |     |   |     |   |     |   | -YMDSSDS-IPRLHT-DSCSS                                |   |     |   | : 212 |
| CaNAC47  | : NEKKP                                                                                         |   |     |   |     |   |     |   | -DHTDTSDS-VPRFHT-DSSCS                               |   |     |   | : 218 |
| ATAF2    | : ADEKP                                                                                         |   |     |   |     |   |     |   | -FDTSDSTYPTLQE-DDSSSSGG                              |   |     |   | : 206 |
| SNAC1    | : SHSHTHSWGETRTPSEIIVDND                                                                        |   |     |   |     |   |     |   | -PFPELDSFPAFQAPPPATAMMVP                             |   |     |   | : 240 |
| CaNAC39  | : -                                                                                             |   |     |   |     |   |     |   | -SVSINNQR                                            |   |     |   | : 189 |
| CaNAC46  | : -                                                                                             |   |     |   |     |   |     |   | -STSTHHAPSKL                                         |   |     |   | : 190 |
| CaNAC21  | : -                                                                                             |   |     |   |     |   |     |   | -                                                    |   |     |   | : 194 |
| CaNAC19  | : HTHASQELMNSQSNYSQAYDIDNENYAPCEDDFTFMVGTNYNHIND                                                |   |     |   |     |   |     |   | -LNSMSYVDKPWEDLSTRSIEIGDQDEEFKEKRMVENLRWIGMPREDFEK   |   |     |   | : 385 |
| CaNAC44  | : VAQASQDLIHQSNYSHFPFGNQ                                                                        |   |     |   |     |   |     |   | -DFTFMVGNVNYNHVNDH                                   |   |     |   | : 387 |
| CaNAC66  | : LIECSQTIINECETMSD                                                                             |   |     |   |     |   |     |   | -TLGT                                                |   |     |   | : 209 |
| CaNAC07  | : NMDHEKVLNNHHPKFPDCASS                                                                         |   |     |   |     |   |     |   | -DVTQGT                                              |   |     |   | : 240 |
| CaNAC58  | : SQASHLNN                                                                                      |   |     |   |     |   |     |   | -ESGYSSPVTSPQN                                       |   |     |   | : 230 |
| CaNAC62  | : SQASQLCSGSESLYSSPIDFSGN                                                                       |   |     |   |     |   |     |   | -VPLMAGFEQASSDTPNS                                   |   |     |   | : 232 |
| CaNAC30  | : GNGGVSCSEGRNNVAQDSQSNNNKAPLDVNKLPIETQNLAVACKR                                                 |   |     |   |     |   |     |   | -ESQAEYSPPEKDDSKHMHVDEYSPSQTDNPKPLPQI                |   |     |   | : 310 |
| CaNAC42  | : APAPILPSSCHTSVANDMHPTTS                                                                       |   |     |   |     |   |     |   | -CGIGLASSSYLSRVMP                                    |   |     |   | : 261 |
| CaNAC31  | : QIVPVPAAASGDDYVADDLQKELETSVTVGSADPPSNFYGYECSS                                                 |   |     |   |     |   |     |   | -HPQLSQTFVNDHMQLASFGMYDVLQDQDNMAGGYQDNLVQDGDYG       |   |     |   | : 304 |
| CaNAC33  | : DEIDEIIEKIFDVEVPVDDQYVNGYVDFPQVVGEEETQSMILGQFS                                                |   |     |   |     |   |     |   | -EAVIFPEASGELQCSQYVYDVPSPSFDNFQSIASPLHFSE            |   |     |   | : 307 |
| CaNAC68  | : EGALQILRQMGRGCKEENYEAACNNNYERFARFDDHTNLNN                                                     |   |     |   |     |   |     |   | -MNGGNYNNERFMKLPSELSPRKSTSMENNE                      |   |     |   | : 277 |
| CaNAC69  | : EGALQILRQMGRGCKEENYEAACNNNYERFARFDDHTNLNN                                                     |   |     |   |     |   |     |   | -MNGGNYNNERFMKLPSELSPRKSTSMENNE                      |   |     |   | : 276 |
| CaNAC08  | : EDHIMNHMRRTNAPCHNNILEPKHHHHKQ                                                                 |   |     |   |     |   |     |   | -QQGGLLYD                                            |   |     |   | : 231 |
| CaNAC56  | : -THNHQEQQMMINISSTGNPRSFHMRNQLLHHQQQQNH                                                        |   |     |   |     |   |     |   | -AGFEHEKPELSLHYQHLQQNSQ                              |   |     |   | : 232 |
| CaNAC59  | : VSGIISRVDPIDLIIRQQRISAQNF                                                                     |   |     |   |     |   |     |   | -LYKQIEIEPEANN                                       |   |     |   | : 238 |
| CaNAC63  | : ASGMSMVDPIDLIISRQPSFLAQSFN                                                                    |   |     |   |     |   |     |   | -MCKQIEIEAENNNNN                                     |   |     |   | : 246 |
| CaNAC61  | : VS-LIQELESPPNRVSHPHYASYQONY                                                                   |   |     |   |     |   |     |   | -PCKQLDQLQYIN                                        |   |     |   | : 233 |
| CaNAC32  | : HQQQPHYFRDETYSTRPLSTIDIFHEGTSYSHPFSTEQQQ                                                      |   |     |   |     |   |     |   | -FLSNQTLIMDKNLIELQPLE                                |   |     |   | : 239 |
| CaNAC35  | : VGARKYPSSNPTRATLNPYNINLEVGPSINMQPQPMNHLG                                                      |   |     |   |     |   |     |   | -DHSTTHFLYGRNYINTPL                                  |   |     |   | : 237 |
| CaNAC64  | : IASKK-PQQTSSSQPSCPDDTSIVNEFGDVELHMDYST                                                        |   |     |   |     |   |     |   | -NNISFPQNFN-TNNVNTNMN                                |   |     |   | : 209 |
| CaNAC09  | : SSGSKTKITSTTSASNNMSMLCEPSSPSVYLPPLDSSP                                                        |   |     |   |     |   |     |   | -YTAGTAATAFDNRQMCQTYNNNNNDNNSN                       |   |     |   | : 264 |
| CaNAC13  | : SCGKKMHQDLVRFNS                                                                               |   |     |   |     |   |     |   | -IGKELPPLMDSSPNNSL                                   |   |     |   | : 233 |
| CaNAC22  | : DYGKKVHGPKLGRFDSKEGASTNSLLPPLMDSSLYKSETK                                                      |   |     |   |     |   |     |   | -FTTGFEFSPVNSFSIPNQTNQKTLDD                          |   |     |   | : 238 |
| CaNAC57  | : SAGKKTHISGIMRLDTLGN-DLGSSVLPPLTDSSHSIGRIK                                                     |   |     |   |     |   |     |   | -QLN-DSAYVPCFSN--SIDVQRNQG                           |   |     |   | : 309 |
| CaNAC14  | : TEIKKNSFNLRLRINSLDLDLDFSSLPPLVDPFSS-NTIN-S                                                    |   |     |   |     |   |     |   | -PPSSSSKPPPNNGVYFBSYLLNNINQNIPI                      |   |     |   | : 240 |
| CaNAC35  | : TDVKKTIQISGLRMMNSINDLLDYSLLPPLMDPSYTSDELKGIT                                                  |   |     |   |     |   |     |   | -NQISSSKSQSDGYFLPSFSINNHNKFLVPIKEDHNHRNYDQTQTIMNYTSN |   |     |   | : 263 |
| CaNAC38  | : -VEKRNSIIQVEGSSNISLKKGLSLPPPLPNPTSFSLQ                                                        |   |     |   |     |   |     |   | -NDQLTHSHFPLHAFQTSFP                                 |   |     |   | : 237 |
| CaNAC26  | : EDNNNNNNSKINTQQLMYETHPSLTASSSPTNQTMPSVY                                                       |   |     |   |     |   |     |   | -NRIDSFS--SSMTTLHHLI                                 |   |     |   | : 216 |
| CaNAC29  | : TDN                                                                                           |   |     |   |     |   |     |   | -NQLASFS--SSMTTHHFFHN                                |   |     |   | : 211 |
| CaNAC11  | : EIAAKP-SMGSCYDDTGSSSLPALMDSYISFDQAQFHADY                                                      |   |     |   |     |   |     |   | -EQVPCFSIFSQNTNPIFNMM                                |   |     |   | : 221 |
| CaNAC10  | : AEVKQLATKRQMIHDKSSRMSSNVEFNINNQQ                                                              |   |     |   |     |   |     |   | -TFINFGASHENHHNNNI                                   |   |     |   | : 236 |
| CaNAC20  | : NLEKDLATT                                                                                     |   |     |   |     |   |     |   | -VTNSSSSKTCLESDSN                                    |   |     |   | : 223 |
| CaNAC15  | : QETQFCSSNNMS-QPKKTTLLPNNFFFNNNNNNTQNFVDVD-VTP                                                 |   |     |   |     |   |     |   | -YKSIINPLLHKAFDHLPISN                                |   |     |   | : 287 |
| CaNAC70  | : GNNNQFCSQNMMLLAKKPNFTSQFCATNNHNTTSSNTTLCPLNIPSYNNKPIIDPLIYTPYKLPISNDQNLNNLSTHGLLFSSPLETSSNTCN |   |     |   |     |   |     |   | -NDLNTSLIPSSSPLTSSNTINF                              |   |     |   | : 296 |
| CaNAC12  | : SNTNQLCSQSNISLSTKTEQESSTIKFCSNNNTNFS                                                          |   |     |   |     |   |     |   | -PSYFPNYTISKSSQIPNGD                                 |   |     |   | : 289 |
| CaNAC36  | : AAATPTPTATASINNKMHEGSCSVGNSNSDHVTTVLG                                                         |   |     |   |     |   |     |   | -LSKYSTDPNYRAAEE                                     |   |     |   | : 318 |
| CaNAC03  | : LMKDSSMIFSDRLNGGGQVHEVVNH                                                                     |   |     |   |     |   |     |   | -RNS--GVEVYNTS-FISFDQGE                              |   |     |   | : 262 |
| CaNAC53  | : LKIDS                                                                                         |   |     |   |     |   |     |   | -VSEKTIKQNGNGQVING                                   |   |     |   | : 266 |
| CaNAC51  | : IMKDTYENRMSERNVQDDDNIVSKN                                                                     |   |     |   |     |   |     |   | -VVP--TMDYINCDFPMNYEHV                               |   |     |   | : 283 |
| CaNAC45  | : KSVTNINGEAIERGRDSCGSCGSSSKSEIVHHHNNHNRDEMSAV                                                  |   |     |   |     |   |     |   | -TPTLTNFTSSLD--IQHLKNDHFGFIPPRKSFDEVGJESCR           |   |     |   | : 308 |
| CaNAC65  | : SATTIGEGNGEPNRYDEMSNVNVN                                                                      |   |     |   |     |   |     |   | -VNVNG                                               |   |     |   | : 292 |
| CaNAC18  | : LDIPATEATIIVKDPVTPKSVTPE                                                                      |   |     |   |     |   |     |   | -VTPPTSFNHTLDNVQAQQLKSDHFSFIPPRKSFYEVGIGEAST         |   |     |   | : 291 |
| CaNAC37  | : KPLAEEDPNVTRTSPTTPKPNFPN                                                                      |   |     |   |     |   |     |   | -PPYNERQYSDVDLQGETPAIPQPPQMDCLDEIQADCEEH             |   |     |   | : 286 |
| CaNAC04  | : SSGSPSMEQIDSVSESNNQRANDTTLTESSGHKLMDEEDCYAETLKN                                               |   |     |   |     |   |     |   | -PPRTGICVENDNIDETALLFAEDAKSIPG-EHAQPS                |   |     |   | : 290 |
| CaNAC23  | : RPVVIDFTMEDATACPPPPPMSP                                                                       |   |     |   |     |   |     |   | -DIKLDSESSMSQGAQTTPPDPAQSPQCG                        |   |     |   | : 197 |
| CaNAC60  | : VIVSTNIDDTSPNQSNQHFGVQMQMAS                                                                   |   |     |   |     |   |     |   | -LSYDMDFTPYQLSGHFQTQMQMASLLCN                        |   |     |   | : 166 |

|         | 600 | 620 | 640                                                                                | 660                                              | 680                                              | 700                   |                |       |
|---------|-----|-----|------------------------------------------------------------------------------------|--------------------------------------------------|--------------------------------------------------|-----------------------|----------------|-------|
| CaNAC01 | :   |     |                                                                                    |                                                  |                                                  |                       | :              |       |
| CaNAC49 | :   |     |                                                                                    |                                                  |                                                  |                       | :              |       |
| CaNAC48 | :   |     |                                                                                    |                                                  |                                                  |                       | :              |       |
| CaNAC17 | :   |     | ---NQSGNGHSSNDGHNSSMVVKKEYEYKKGVEEKGKNTCPNDIIIVIALESSTDSGNEININQRPRSPIDSGNNKTEVVKT | :                                                |                                                  |                       | : 306          |       |
| CaNAC34 | :   |     |                                                                                    |                                                  | ---VWLEKNTD---                                   | ---QRPRNQVDNGNNKIDVNT | : 225          |       |
| CaNAC28 | :   |     | ---EGSQMDINVDHR---                                                                 |                                                  | ---EPLLYWEHVDWFLGIEP---                          |                       | : 250          |       |
| CaNAC55 | :   |     | ---GSSSTNWTLNNDNDNDND---                                                           | ---DNDNDNDDELLQEPLEWEWECENFKWP---                |                                                  |                       | : 272          |       |
| CaNAC54 | :   |     | ---TKNGMGIVKRDNNKKGICGTSLQPFGRDNVPELQLPIATDWTQDTFWAQFNSPWL---                      |                                                  | ---QNWNTASNILNF---                               |                       | : 307          |       |
| CaNAC41 | :   |     | ---HDIQNKLAELAAQEDQ---MNFDIYYPNKEGLDDRLFSFALVHMPQEFHYEANNESDGGCGGQYGTNEINISDF      | :                                                |                                                  |                       | : 323          |       |
| CaNAC71 | :   |     | ---SDAQNQIVTTAAEEDQLFNLDIFDPSQFEQLDDKLFSPVHAHFPPQDFFYETNNEVE---                    |                                                  | ---FQYGTNETDVSDF---                              |                       | : 321          |       |
| CaNAC02 | :   |     | ---NMSSLSFKSGKGNLTSYEEGSKNVN---                                                    | ---SQTALPSLECYFNP---                             |                                                  | ---LKRKSND---         | : 279          |       |
| CaNAC27 | :   |     | ---SIGMSSNNKSHASLYENNLIIG---                                                       | ---AQFLSSAAEGLFNP---                             |                                                  | ---QRRKAVEE---        | : 271          |       |
| CaNAC05 | :   |     | ---TVATLSSQLG---                                                                   | ---GSASTSNASASKR---                              | ---TLSSLYWNDHEDVAASN---                          | ---KRFNLED---         | : 294          |       |
| CaNAC50 | :   |     | ---HHEEMQNGCGSHDINSKNDNDSFPMKRALTASSQFWNETGSPGSSS---                               |                                                  |                                                  | ---SSKRFHGD---        | : 314          |       |
| CaNAC16 | :   |     | ---NLLDMNYLGPISQILSDGSYNSTFEY---                                                   | ---QINTAHGGIIVDP---                              |                                                  | ---FVKSGMVE---        | : 250          |       |
| CaNAC52 | :   |     | ---YLLDMNYFGP---                                                                   | ---ILSDG---                                      | ---STDFD---                                      | ---QINNSN---IGIDP---  | ---FVKPGPVE--- | : 240 |
| ANAC029 | :   |     | ---HLLMDMYMGP---                                                                   | ---VSHIDNFSQFDH---                               | ---LHQPDSESSWFGD---                              | ---LQFNQ---DE---      | : 256          |       |
| CaNAC24 | :   |     | ---FSLSENHSNPSSGIGSSTSFENTFNQF---                                                  |                                                  | ---SSQINTNNNYMFQKN---                            | ---TSKQQLSN---        | : 284          |       |
| CaNAC06 | :   |     | ---QHRQEEDKLNLNLNNNNLMDWSNPSS---                                                   | ---ILNT---EFQEQGN---NGMVNYSNNDLVPVSSTICHVNTSG--- |                                                  |                       | : 286          |       |
| CaNAC67 | :   |     | ---QQ---                                                                           | ---EELKGFHNM DAGIFADWVNPTD---                    | ---LESIPEFDSYNTQGTFFNFN---FNDHTVPSVPFFGYMELTT--- |                       | : 281          |       |
| ANAC019 | :   |     | ---RPDLTEQRTGFHGLADTSNFDWASFAGNV---                                                | ---EHNNSVPPELGMSHV---                            |                                                  | ---VFNLEYNGCYL---     | : 277          |       |
| ANAC055 | :   |     | ---RPVLTNHTKTFGQGLAREPSFDWANLIG---                                                 | ---QNSVPELGLSHN---                               |                                                  | ---VPSIRYGDG---       | : 272          |       |
| ANAC072 | :   |     | ---MNSLRTILNG---                                                                   | ---NFDWASLAG---                                  | ---LNPIPELAPTNG---                               | ---LPSYGGYDAFR---     | : 272          |       |
| CaNAC40 | :   |     | ---EHVVSPEFAS---                                                                   | ---EVQSEPK---WNEW---                             | ---EKHLEFPYN---                                  | ---YVDTTL---          | : 263          |       |
| ATAF1   | :   |     | ---EQVVSPEFTS---                                                                   | ---EVQSEPK---WKDWSAV---                          | ---SNDNNNTLDFGFN---                              | ---VIDATV---          | : 262          |       |
| CaNAC6  | :   |     | ---EQVLSPEFAC---                                                                   | ---EVQSQPK---                                    | ---ISEWER---                                     | ---TFATVGPINPAAS---   | ---ILDPAQ---   | : 276 |
| CaNAC43 | :   |     | ---GHVVSVDVTCDEKVEQSEVK---                                                         | ---WNEFGL---                                     | ---QLD---                                        | ---DAFDFELN---        | ---SLDTS---    | : 254 |
| CaNAC47 | :   |     | ---EHVVSVDVTCDEKVEQSEPK---                                                         | ---WNEFVL---                                     | ---GDPVVSADFQLN---                               |                       | ---FMDGGE---   | : 262 |
| ATAF2   | :   |     | ---HGHVVSVDV---                                                                    | ---LEVQSEPK---                                   | ---WGELED---                                     | ---ALEAFDTSMPGSS---   | ---MELLQP---   | : 248 |
| SNAC1   | :   |     | ---KKESMDDATAAAAAAATIPRNNSSLEFVLD---                                               |                                                  | ---SYDDIQMGYSGLD---                              |                       | ---MLPPGD---   | : 288 |
| CaNAC39 | :   |     | ---FFDFMRVHNAAPGPMITSSSSS---                                                       |                                                  | ---TSTEVSS---                                    |                       | : 218          |       |
| CaNAC46 | :   |     | ---MDFMVMVSNKTSSTSSSCSSSI---                                                       |                                                  | ---NNIEVSSNA---                                  |                       | : 223          |       |
| CaNAC21 | :   |     | ---VVVFYDLSSPILSATSGITEEHNENE---                                                   |                                                  | ---NENEHEDSS---                                  |                       | : 229          |       |
| CaNAC19 | :   |     | CaNAC19                                                                            | :                                                | CaNAC19                                          | :                     | : 497          |       |
| CaNAC44 | :   |     | CaNAC44                                                                            | :                                                | CaNAC44                                          | :                     | : 501          |       |
| CaNAC66 | :   |     | CaNAC66                                                                            | :                                                | CaNAC66                                          | :                     | : 237          |       |
| CaNAC07 | :   |     | CaNAC07                                                                            | :                                                | CaNAC07                                          | :                     | : 298          |       |
| CaNAC58 | :   |     | CaNAC58                                                                            | :                                                | CaNAC58                                          | :                     | : 264          |       |
| CaNAC62 | :   |     | CaNAC62                                                                            | :                                                | CaNAC62                                          | :                     | : 274          |       |
| CaNAC30 | :   |     | CaNAC30                                                                            | :                                                | CaNAC30                                          | :                     | : 385          |       |
| CaNAC42 | :   |     | CaNAC42                                                                            | :                                                | CaNAC42                                          | :                     | : 304          |       |
| CaNAC31 | :   |     | CaNAC31                                                                            | :                                                | CaNAC31                                          | :                     | : 412          |       |
| CaNAC33 | :   |     | CaNAC33                                                                            | :                                                | CaNAC33                                          | :                     | : 393          |       |
| CaNAC68 | :   |     | CaNAC68                                                                            | :                                                | CaNAC68                                          | :                     | : 359          |       |
| CaNAC69 | :   |     | CaNAC69                                                                            | :                                                | CaNAC69                                          | :                     | : 358          |       |
| CaNAC08 | :   |     | CaNAC08                                                                            | :                                                | CaNAC08                                          | :                     | : 295          |       |
| CaNAC56 | :   |     | CaNAC56                                                                            | :                                                | CaNAC56                                          | :                     | : 306          |       |
| CaNAC59 | :   |     | CaNAC59                                                                            | :                                                | CaNAC59                                          | :                     | : 287          |       |
| CaNAC63 | :   |     | CaNAC63                                                                            | :                                                | CaNAC63                                          | :                     | : 289          |       |
| CaNAC61 | :   |     | CaNAC61                                                                            | :                                                | CaNAC61                                          | :                     | : 280          |       |
| CaNAC35 | :   |     | CaNAC35                                                                            | :                                                | CaNAC35                                          | :                     | : 296          |       |
| CaNAC64 | :   |     | CaNAC64                                                                            | :                                                | CaNAC64                                          | :                     | : 280          |       |
| CaNAC09 | :   |     | CaNAC09                                                                            | :                                                | CaNAC09                                          | :                     | : 335          |       |
| CaNAC13 | :   |     | CaNAC13                                                                            | :                                                | CaNAC13                                          | :                     | : 308          |       |
| CaNAC22 | :   |     | CaNAC22                                                                            | :                                                | CaNAC22                                          | :                     | : 316          |       |
| CaNAC57 | :   |     | CaNAC57                                                                            | :                                                | CaNAC57                                          | :                     | : 381          |       |
| CaNAC14 | :   |     | CaNAC14                                                                            | :                                                | CaNAC14                                          | :                     | : 313          |       |
| CaNAC25 | :   |     | CaNAC25                                                                            | :                                                | CaNAC25                                          | :                     | : 340          |       |
| CaNAC38 | :   |     | CaNAC38                                                                            | :                                                | CaNAC38                                          | :                     | : 305          |       |
| CaNAC26 | :   |     | CaNAC26                                                                            | :                                                | CaNAC26                                          | :                     | : 259          |       |
| CaNAC29 | :   |     | CaNAC29                                                                            | :                                                | CaNAC29                                          | :                     | : 252          |       |
| CaNAC11 | :   |     | CaNAC11                                                                            | :                                                | CaNAC11                                          | :                     | : 277          |       |
| CaNAC10 | :   |     | CaNAC10                                                                            | :                                                | CaNAC10                                          | :                     | : 281          |       |
| CaNAC20 | :   |     | CaNAC20                                                                            | :                                                | CaNAC20                                          | :                     | : 263          |       |
| CaNAC15 | :   |     | CaNAC15                                                                            | :                                                | CaNAC15                                          | :                     | : 359          |       |
| CaNAC70 | :   |     | CaNAC70                                                                            | :                                                | CaNAC70                                          | :                     | : 361          |       |
| CaNAC12 | :   |     | CaNAC12                                                                            | :                                                | CaNAC12                                          | :                     | : 340          |       |
| CaNAC36 | :   |     | CaNAC36                                                                            | :                                                | CaNAC36                                          | :                     | : 368          |       |
| CaNAC03 | :   |     | CaNAC03                                                                            | :                                                | CaNAC03                                          | :                     | : 286          |       |
| CaNAC53 | :   |     | CaNAC53                                                                            | :                                                | CaNAC53                                          | :                     | : 292          |       |
| CaNAC51 | :   |     | CaNAC51                                                                            | :                                                | CaNAC51                                          | :                     | : 322          |       |
| CaNAC45 | :   |     | CaNAC45                                                                            | :                                                | CaNAC45                                          | :                     | : 382          |       |
| CaNAC65 | :   |     | CaNAC65                                                                            | :                                                | CaNAC65                                          | :                     | : 359          |       |
| CaNAC18 | :   |     | CaNAC18                                                                            | :                                                | CaNAC18                                          | :                     | : 365          |       |
| CaNAC37 | :   |     | CaNAC37                                                                            | :                                                | CaNAC37                                          | :                     | : 355          |       |
| CaNAC04 | :   |     | CaNAC04                                                                            | :                                                | CaNAC04                                          | :                     | : 374          |       |
| CaNAC23 | :   |     | CaNAC23                                                                            | :                                                | CaNAC23                                          | :                     | : 240          |       |
| CaNAC60 | :   |     | CaNAC60                                                                            | :                                                | CaNAC60                                          | :                     | : 240          |       |

[illegible]

[illegible]

|           |                                                                     |   |       |   |       |   |       |   |       |
|-----------|---------------------------------------------------------------------|---|-------|---|-------|---|-------|---|-------|
|           |                                                                     | * | 960   | * | 980   | * | 1000  | * |       |
| CaNAC01 : | -----                                                               | : | ----- | : | ----- | : | ----- | : | ----- |
| CaNAC49 : | -----                                                               | : | ----- | : | ----- | : | ----- | : | ----- |
| CaNAC48 : | -----                                                               | : | ----- | : | ----- | : | ----- | : | ----- |
| CaNAC17 : | -----                                                               | : | ----- | : | ----- | : | ----- | : | ----- |
| CaNAC34 : | -----                                                               | : | ----- | : | ----- | : | ----- | : | ----- |
| CaNAC28 : | -----                                                               | : | ----- | : | ----- | : | ----- | : | ----- |
| CaNAC55 : | -----                                                               | : | ----- | : | ----- | : | ----- | : | ----- |
| CaNAC54 : | -----                                                               | : | ----- | : | ----- | : | ----- | : | ----- |
| CaNAC41 : | KISRR-VTSAGSILGLRDFLLAKAPFRSKASPKCTLWSSVFVVSASVLVSLAVFTNIWGYIKI---- | : | 612   | : |       | : |       | : |       |
| CaNAC71 : | KISQQHVTTTESILEWKDSLGRRCYSSKISSNRAMWSSVLAVSAIVLVSLVLFVNIWGYLRIETAH  | : | 610   | : |       | : |       | : |       |
| CaNAC02 : | -----                                                               | : | ----- | : | ----- | : | ----- | : | ----- |
| CaNAC27 : | -----                                                               | : | ----- | : | ----- | : | ----- | : | ----- |
| CaNAC05 : | -----                                                               | : | ----- | : | ----- | : | ----- | : | ----- |
| CaNAC50 : | -----                                                               | : | ----- | : | ----- | : | ----- | : | ----- |
| CaNAC16 : | -----                                                               | : | ----- | : | ----- | : | ----- | : | ----- |
| CaNAC52 : | -----                                                               | : | ----- | : | ----- | : | ----- | : | ----- |
| ANAC029 : | -----                                                               | : | ----- | : | ----- | : | ----- | : | ----- |
| CaNAC24 : | -----                                                               | : | ----- | : | ----- | : | ----- | : | ----- |
| CaNAC06 : | -----                                                               | : | ----- | : | ----- | : | ----- | : | ----- |
| CaNAC67 : | -----                                                               | : | ----- | : | ----- | : | ----- | : | ----- |
| ANAC019 : | -----                                                               | : | ----- | : | ----- | : | ----- | : | ----- |
| ANAC055 : | -----                                                               | : | ----- | : | ----- | : | ----- | : | ----- |
| ANAC072 : | -----                                                               | : | ----- | : | ----- | : | ----- | : | ----- |
| CaNAC40 : | -----                                                               | : | ----- | : | ----- | : | ----- | : | ----- |
| ATAF1 :   | -----                                                               | : | ----- | : | ----- | : | ----- | : | ----- |
| OsNAC6 :  | -----                                                               | : | ----- | : | ----- | : | ----- | : | ----- |
| CaNAC43 : | -----                                                               | : | ----- | : | ----- | : | ----- | : | ----- |
| CaNAC47 : | -----                                                               | : | ----- | : | ----- | : | ----- | : | ----- |
| ATAF2 :   | -----                                                               | : | ----- | : | ----- | : | ----- | : | ----- |
| SNAC1 :   | -----                                                               | : | ----- | : | ----- | : | ----- | : | ----- |
| CaNAC39 : | -----                                                               | : | ----- | : | ----- | : | ----- | : | ----- |
| CaNAC46 : | -----                                                               | : | ----- | : | ----- | : | ----- | : | ----- |
| CaNAC21 : | -----                                                               | : | ----- | : | ----- | : | ----- | : | ----- |
| CaNAC19 : | -----                                                               | : | ----- | : | ----- | : | ----- | : | ----- |
| CaNAC44 : | -----                                                               | : | ----- | : | ----- | : | ----- | : | ----- |
| CaNAC66 : | -----                                                               | : | ----- | : | ----- | : | ----- | : | ----- |
| CaNAC07 : | -----                                                               | : | ----- | : | ----- | : | ----- | : | ----- |
| CaNAC58 : | -----                                                               | : | ----- | : | ----- | : | ----- | : | ----- |
| CaNAC62 : | -----                                                               | : | ----- | : | ----- | : | ----- | : | ----- |
| CaNAC30 : | -----                                                               | : | ----- | : | ----- | : | ----- | : | ----- |
| CaNAC42 : | -----                                                               | : | ----- | : | ----- | : | ----- | : | ----- |
| CaNAC31 : | -----                                                               | : | ----- | : | ----- | : | ----- | : | ----- |
| CaNAC33 : | -----                                                               | : | ----- | : | ----- | : | ----- | : | ----- |
| CaNAC68 : | -----                                                               | : | ----- | : | ----- | : | ----- | : | ----- |
| CaNAC69 : | -----                                                               | : | ----- | : | ----- | : | ----- | : | ----- |
| CaNAC08 : | -----                                                               | : | ----- | : | ----- | : | ----- | : | ----- |
| CaNAC56 : | -----                                                               | : | ----- | : | ----- | : | ----- | : | ----- |
| CaNAC59 : | -----                                                               | : | ----- | : | ----- | : | ----- | : | ----- |
| CaNAC63 : | -----                                                               | : | ----- | : | ----- | : | ----- | : | ----- |
| CaNAC61 : | -----                                                               | : | ----- | : | ----- | : | ----- | : | ----- |
| CaNAC32 : | -----                                                               | : | ----- | : | ----- | : | ----- | : | ----- |
| CaNAC35 : | -----                                                               | : | ----- | : | ----- | : | ----- | : | ----- |
| CaNAC64 : | -----                                                               | : | ----- | : | ----- | : | ----- | : | ----- |
| CaNAC09 : | -----                                                               | : | ----- | : | ----- | : | ----- | : | ----- |
| CaNAC13 : | -----                                                               | : | ----- | : | ----- | : | ----- | : | ----- |
| CaNAC22 : | -----                                                               | : | ----- | : | ----- | : | ----- | : | ----- |
| CaNAC57 : | -----                                                               | : | ----- | : | ----- | : | ----- | : | ----- |
| CaNAC14 : | -----                                                               | : | ----- | : | ----- | : | ----- | : | ----- |
| CaNAC25 : | -----                                                               | : | ----- | : | ----- | : | ----- | : | ----- |
| CaNAC38 : | -----                                                               | : | ----- | : | ----- | : | ----- | : | ----- |
| CaNAC26 : | -----                                                               | : | ----- | : | ----- | : | ----- | : | ----- |
| CaNAC29 : | -----                                                               | : | ----- | : | ----- | : | ----- | : | ----- |
| CaNAC11 : | -----                                                               | : | ----- | : | ----- | : | ----- | : | ----- |
| CaNAC10 : | -----                                                               | : | ----- | : | ----- | : | ----- | : | ----- |
| CaNAC20 : | -----                                                               | : | ----- | : | ----- | : | ----- | : | ----- |
| CaNAC15 : | -----                                                               | : | ----- | : | ----- | : | ----- | : | ----- |
| CaNAC70 : | -----                                                               | : | ----- | : | ----- | : | ----- | : | ----- |
| CaNAC12 : | -----                                                               | : | ----- | : | ----- | : | ----- | : | ----- |
| CaNAC36 : | -----                                                               | : | ----- | : | ----- | : | ----- | : | ----- |
| CaNAC03 : | -----                                                               | : | ----- | : | ----- | : | ----- | : | ----- |
| CaNAC53 : | -----                                                               | : | ----- | : | ----- | : | ----- | : | ----- |
| CaNAC51 : | -----                                                               | : | ----- | : | ----- | : | ----- | : | ----- |
| CaNAC45 : | -----                                                               | : | ----- | : | ----- | : | ----- | : | ----- |
| CaNAC65 : | -----                                                               | : | ----- | : | ----- | : | ----- | : | ----- |
| CaNAC18 : | -----                                                               | : | ----- | : | ----- | : | ----- | : | ----- |
| CaNAC37 : | -----                                                               | : | ----- | : | ----- | : | ----- | : | ----- |
| CaNAC04 : | -----                                                               | : | ----- | : | ----- | : | ----- | : | ----- |
| CaNAC23 : | -----                                                               | : | ----- | : | ----- | : | ----- | : | ----- |
| CaNAC60 : | -----                                                               | : | ----- | : | ----- | : | ----- | : | ----- |

**Figure S1. Multiple alignment of 71 CaNACs of chickpea and well-known stress-responsive NACs from *Arabidopsis* (ATAF1/ANAC002, 019, 029, 055, 072 and ATAF2/081) and rice (SNAC1/ONAC002 and OsNAC6/SNAC2/ONAC048).** Conserved NAC domain and subdomains (A-E) are indicated by thick blue line and black thin black lines, respectively, above the sequences. The putative nuclear localization signal (NLS) is shown by a blue double-headed arrow below the sequence. Putative stress-related NAC subgroup is highlighted in red-colored background, and membrane-bound CaNAC members are highlighted in turquoise-colored background.
