# Supplementary material
Source: publisher figshare collection journal article supplement (https://plos.figshare.com/articles/dataset/_/1263184)
Supplement: Supplementary file 1 [file 1 › Figure_S2.pdf]

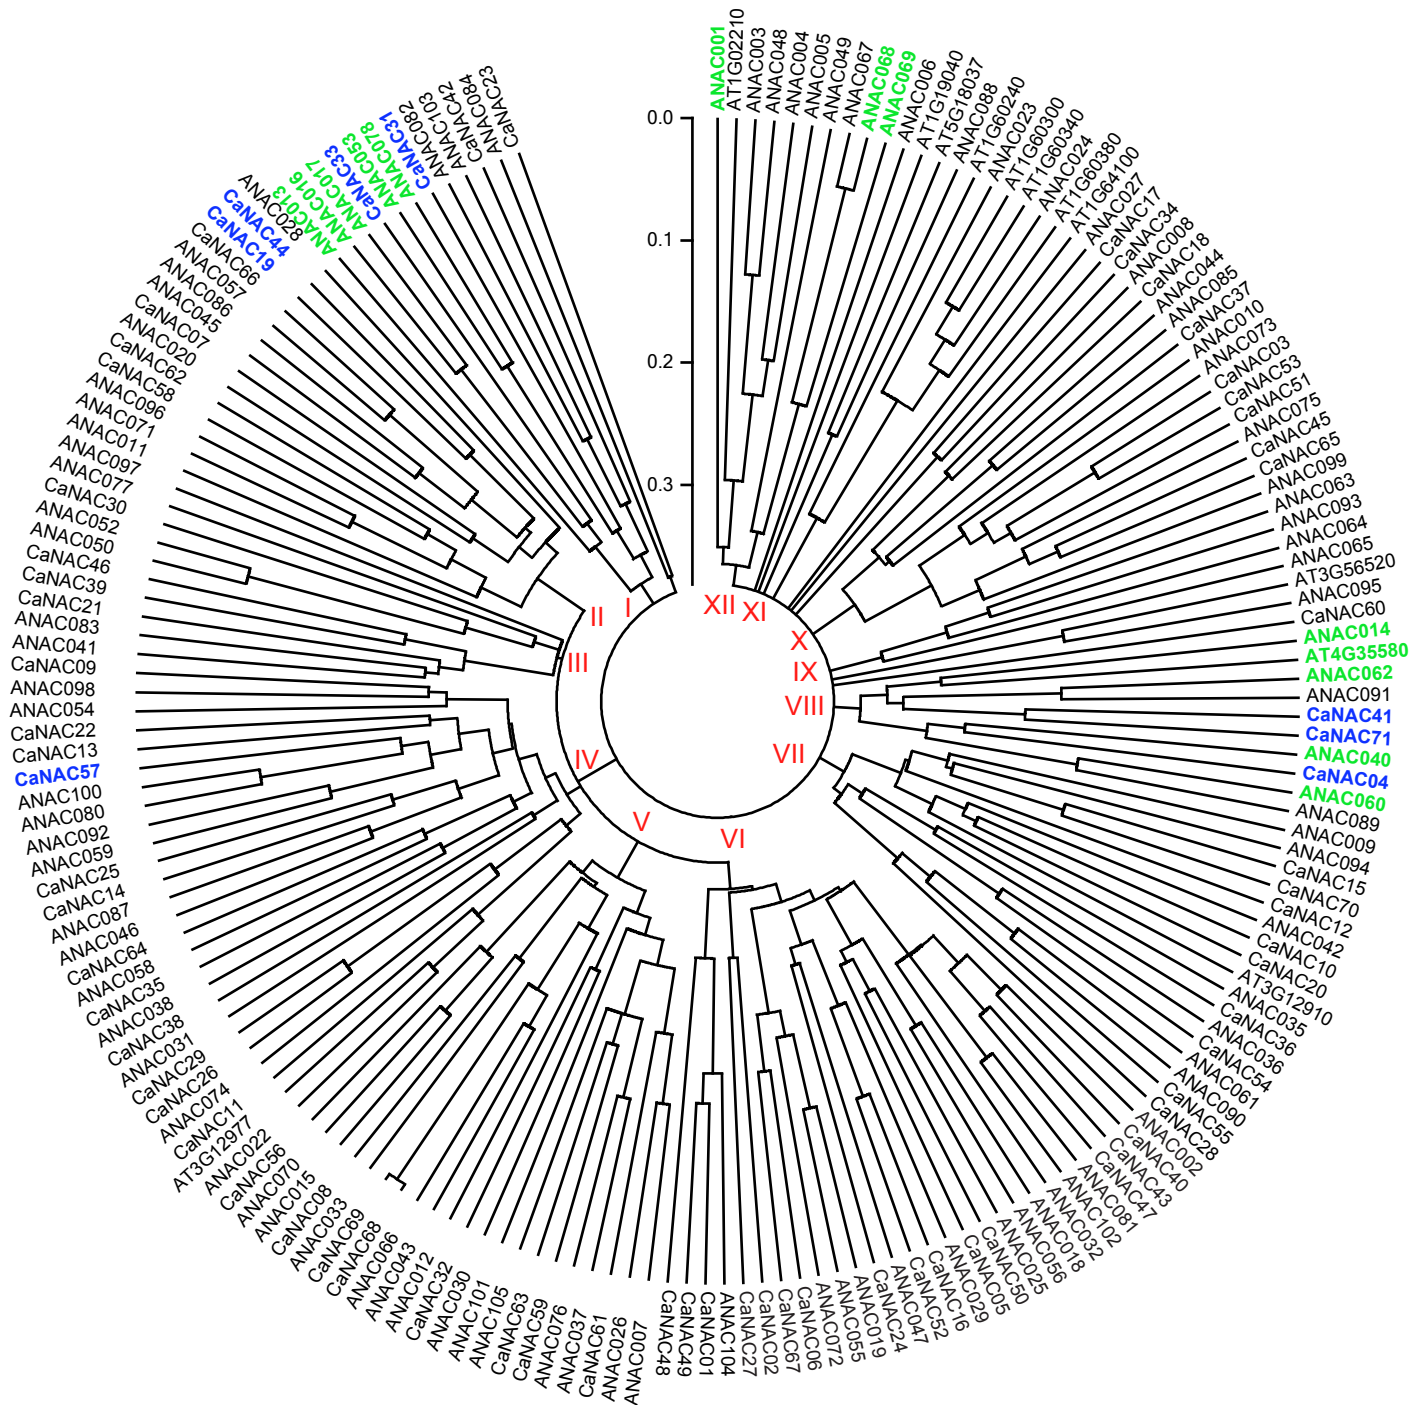

**Figure S2. Phylogenetic relationship of NAC proteins from chickpea (CaNACs) and *Arabidopsis* (ANACs).** The unrooted phylogenetic tree was constructed using the full NAC protein sequences. The membrane-bound CaNAC and ANAC proteins are indicated in blue-colored and green-colored letters, respectively.
