# Supplementary material
Source: publisher figshare collection journal article supplement (https://plos.figshare.com/articles/dataset/_/1263184)
Supplement: Supplementary file 1 [file 1 › Figure_S3.pdf]

**A**

| #  | Gene                  | Dry    |       | ABA    |       | ABA responsiveness |
|----|-----------------------|--------|-------|--------|-------|--------------------|
|    |                       | Leaves | Roots | Leaves | Roots |                    |
| 1  | <i>CaNAC02</i>        | Down   | Down  | Down   | Down  | Dependent          |
| 2  | <i>CaNTL1/CaNAC04</i> | Down   | Down  | Down   | Down  | Dependent          |
| 3  | <i>CaNAC05</i>        | Up     |       |        |       | Independent        |
| 4  | <i>CaNAC06</i>        | Up     | Up    | Up     | Up    | Dependent          |
| 5  | <i>CaNAC16</i>        | Up     | Up    |        |       | Independent        |
| 6  | <i>CaNTL2/CaNAC19</i> | Up     | Up    |        |       | Independent        |
| 7  | <i>CaNAC21</i>        | Up     |       |        | Up    | Dependent          |
| 8  | <i>CaNAC24</i>        | Down   | Up    | Up     | Up    | Dependent          |
| 9  | <i>CaNAC27</i>        | Up     | Up    |        |       | Independent        |
| 10 | <i>CaNTL3/CaNAC31</i> |        |       |        |       |                    |
| 11 | <i>CaNTL4/CaNAC33</i> |        |       |        |       |                    |
| 12 | <i>CaNAC39</i>        |        |       |        |       |                    |
| 13 | <i>CaNAC40</i>        | Up     | Up    |        | Up    | Dependent          |
| 14 | <i>CaNTL5/CaNAC41</i> | Up     |       |        |       | Independent        |
| 15 | <i>CaNAC43</i>        | Up     | Up    |        | Up    | Dependent          |
| 16 | <i>CaNTL6/CaNAC44</i> |        | Up    |        |       | Independent        |
| 17 | <i>CaNAC46</i>        | Down   | Down  | Up     |       | Dependent          |
| 18 | <i>CaNAC47</i>        | Up     | Up    |        |       | Independent        |
| 19 | <i>CaNAC50</i>        | Up     | Up    | Up     | Up    | Dependent          |
| 20 | <i>CaNAC52</i>        | Up     | Up    | Up     | Up    | Dependent          |
| 21 | <i>CaNTL7/CaNAC57</i> | Up     |       | Up     |       | Dependent          |
| 22 | <i>CaNAC67</i>        | Up     | Up    | Up     | Up    | Dependent          |
| 23 | <i>CaNTL8/CaNAC71</i> |        |       |        |       |                    |

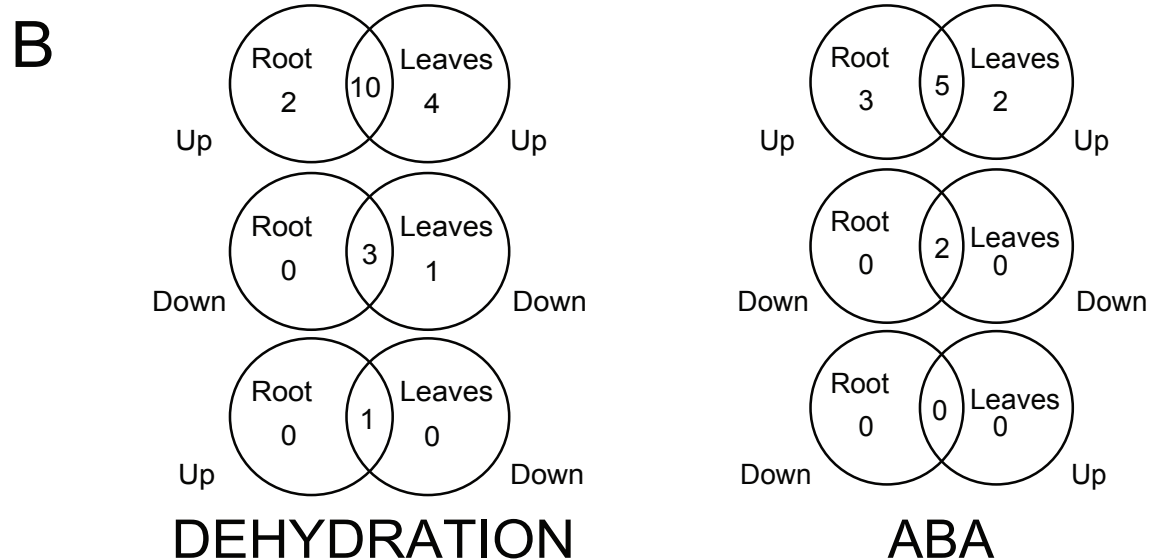

**Figure S3. Expression of 23 selected *CaNAC* genes in chickpea roots and leaves under dehydration and ABA treatments.** (A) Summary of the results of the expression data. (B) Venn diagram analysis of dehydration- and ABA-responsive *CaNAC* genes in roots and leaves of chickpea plants. The ABA- and/or dehydration-responsive genes were defined as those whose expression is altered by at least 2-fold ( $P < 0.05$ ) at 2 and/or 5 h of dehydration and/or ABA treatment.
