# Supplementary material
Source: publisher figshare collection journal article supplement (https://plos.figshare.com/articles/dataset/_/1263184)
Supplement: Supplementary file 1 [file 1 › Table_S1.xls]

## Sheet: Table S1
Table S1. Primers used in RT-qPCR analysis
#	Gene Name	Forward Primers	Reverse Primers
1	CaNAC02	CCATGGGAGCTACCAAAGAA	TTTCGATCTCTCGGGCTAAA
2	CaNAC04	AACAAGACCACCTGACCCTG	AATGCGTCGATTTCTCAACC
3	CaNAC05	CTAAGGCAACGTTCGGAGAG	TTTGGCCTAGCACCATTAGG
4	CaNAC06	GTCCCTTCTGTGTCCACGAT	GCTCCACCACTCTGAACCTC
5	CaNAC16	CACCAAAGGGCCTCAAGACAG	GCCTCATGGATCCAATTTGCCTAT
6	CaNAC19	AGAGGTTTGGTTTGTTGGTG	CCAAACACATGGTGAGGAAA
7	CaNAC21	CTTACCCTTTACCCGCTTCC	TCTTCTCCCAAATCACCTGG
8	CaNAC24	TGCCACCAGGTTTTAGGTTC	AATGATGGAAACAGGCAAGG
9	CaNAC27	GCTTTGTTTGGGGATGAAGA	ACCTGCACCAGCTGCTCTAT
10	CaNAC31	GTTGGCCAAAGCTGGATTGC	GCCGGCACAGATGGAACTAT
11	CaNAC33	GTTTCGGAATCTGCTTCTGC	TCACCAGCTCCTCATCTGTG
12	CaNAC39	CCTCCTGGTTTTCGTTTTCA	AGGAATGATTGAAGCAGGCA
13	CaNAC40	ACGATCCTTGGGATCTTCCT	ATATTTCCTGTCTCGTGGCG
14	CaNAC41	CCTGAAGAGGCAATTGACAGA	TCACCACTGCAGTCAAAGGT
15	CaNAC43	CACTGGTGTTCTACGCTGGA	GCCGGCTGATCTATCAACAT
16	CaNAC44	CCCACATGGTACTCGTACTGG	TTGCAAGCCAGAAGAAGGAT
17	CaNAC46	TATTGGAAGGCAACAGGGTC	TTTCTTAGGCCAACAATGCC
18	CaNAC47	TTTCACACGGATTCAAGCTG	ACAAATTCGTTCCACTTGGG
19	CaNAC50	CCCACCGATGAAGAACTTGT	TACTGGAAGGGGTGCAGAAG
20	CaNAC52	GCTACATCAAAGCCATGCCC	GGCCTCACTCCATTTGGGTA
21	CaNAC57	GTGGTATGCAGGACCAAGCA	GGTGGTGGACGATGGTGATT
22	CaNAC67	ACAGGAGGAGAAGCTCGGAT	TCCTCATCCCGCTTTGAACC
23	CaNAC71	TCCGGTTCCGTCCTACTGAT	ACACACGTCGATTTCACGGA
24	IF4a	TGGACCAGAACACTAGGGACATT	AAACACGGGAAGACCCAGAA
