# Supplementary material
Source: publisher figshare collection journal article supplement (https://plos.figshare.com/articles/dataset/_/1263184)
Supplement: Supplementary file 1 [file 1 › Table_S2.xls]

## Sheet: Table S2
Table S2. Putative CaNAC genes identified in this study and their major features
Gene name	Gene ID of "kabuli" CaNAC genes*	Gene ID of "kabuli" CaNAC genes**	Gene ID of "desi" CaNAC genes***	LOC ID*	Chromosome*	Strand*	Chromosome location*	Protein length* (aa)
CaNAC01	XP_004485547	Ca_00111	Ca_00089	LOC101504837	1	R	895777..897518	201	*According to Ca v1.0 (Bioproject: PRJNA175619) {Varshney, 2013 #139} available at http://www.ncbi.nlm.nih.gov
CaNAC02	XP_004487133	Ca_02520	-	LOC101492252	1	F	12314376..12316362	339	**Gene ID from http://bioinfo.bti.cornell.edu/cgi-bin/itak [Ca v1.0 (Bioproject: PRJNA175619)] {Varshney, 2013 #139}
CaNAC03	XP_004487194	Ca_02457	Ca_17311	LOC101512115	1	R	12880232..12882349	283	***Gene ID from http://nipgr.res.in/CGAP/home.php [Ca v1.0 (Bioproject: PRJNA78951)]{Jain, 2013 #147}
CaNAC04	XP_004487726	Ca_07077	Ca_19833	LOC101495489	1	R	14576094..14584272	476
CaNAC05	XP_004487678	Ca_06901	Ca_15142	LOC101506350	1	R	16635038..16637107	356
CaNAC06	XP_004487679	Ca_06899	Ca_00653	LOC101506671/NAC4	1	R	16678912..16681001	339
CaNAC07	XP_004488556	Ca_23537	Ca_14099	LOC101508708	1	R	37794955..37799588	346
CaNAC08	XP_004488594	Ca_13929	Ca_15989	LOC101496912	1	F	39467864..39470598	339
CaNAC09	XP_004488746	Ca_22532	Ca_00673	LOC101501114	1	R	41957008..41959120	386
CaNAC10	XP_004488808	Ca_13571	Ca_20073	LOC101493257	1	F	43507479..43509614	308
CaNAC11	XP_004488843	Ca_13537	Ca_14182/Ca_14183	LOC101504217	1	F	43953473..43958220	314
CaNAC12	XP_004489492	-	-	LOC101491928	2	F	3336175..3339091	390
CaNAC13	XP_004489410	-	Ca_19397	LOC101493139	2	F	3556655..3558615	347
CaNAC14	XP_004489720	Ca_19144	-	LOC101514407	2	R	6891333..6893765	365
CaNAC15	XP_004490046	Ca_18749	Ca_10381	LOC101490349	2	F	12194248..12195980	406
CaNAC16	XP_004490093	Ca_18090	Ca_14775	LOC101506808/NAC3	2	R	12745730..12747551	285
CaNAC17	XP_004490175	Ca_11687	Ca_01128	LOC101507022	2	F	13061821..13064949	370
CaNAC18	XP_004490275	Ca_24772	Ca_17155	LOC101490669	2	F	16916655..16921266	426
CaNAC19	XP_004490776	Ca_14390	Ca_01290	LOC101514418	2	R	28120209..28124995	624
CaNAC20	XP_004491313	Ca_15236	Ca_15322	LOC101502617	2	F	34132004..34134939	298
CaNAC21	XP_004491679	Ca_22941	-	NAC1	3	R	80024..81684	239
CaNAC22	XP_004491830	Ca_22370	Ca_09480	LOC101488836	3	F	4353236..4359478	363
CaNAC23	XP_004492996	Ca_05989	Ca_02842	LOC101501671	3	R	25447438..25448806	197
CaNAC24	XP_004493136	Ca_08257	Ca_14719	LOC101499961	3	F	26505734..26507888	335
CaNAC25	XP_004493138	Ca_08255	Ca_12753	LOC101500623	3	F	26542506..26544402	388
CaNAC26	XP_004493788	-	Ca_02696	LOC101491532	3	R	31369345..31376279	291
CaNAC27	XP_004493961	Ca_12031	-	LOC101491216	3	R	32934898..32936432	330
CaNAC28	XP_004494211	Ca_00818	Ca_00439	LOC101491116	3	F	35372941..35374862	250
CaNAC29	XP_004495089	Ca_07743	Ca_05065	LOC101498042	4	F	1098403..1103711	279
CaNAC30	XP_004496131	Ca_08371	-	LOC101498838	4	F	8751446..8755902	462
CaNAC31	XP_004496133	Ca_08372	-	LOC101499363	4	F	8769704..8772901	578
CaNAC32	XP_004496367	Ca_04309	Ca_04903	LOC101491341	4	F	10732478..10735900	316
CaNAC33	XP_004496404	Ca_04337	Ca_04679	LOC101502228	4	R	11050388..11054891	558
CaNAC34	XP_004497954	Ca_14204	Ca_20267	LOC101512204	4	F	30535981..30538387	289
CaNAC35	XP_004498547	Ca_11021	Ca_04154	LOC101503733	4	F	40881227..40884198	346
CaNAC36	XP_004499353	Ca_18171	Ca_07999	LOC101492434	5	F	164467..166931	418
CaNAC37	XP_004499395	Ca_23230	Ca_15401	LOC101507083	5	R	993924..999073	384
CaNAC38	XP_004500832	Ca_04804	Ca_05298	LOC101500759	5	F	31052723..31055143	343
CaNAC39	XP_004501729	Ca_01414	Ca_05675	LOC101511564	5	F	38064129..38065239	227
CaNAC40	XP_004502479	Ca_12660	Ca_16618	LOC101510065/NAC5	5	F	43950647..43953096	291
CaNAC41	XP_004502779	Ca_04069	Ca_05967	LOC101492664	5	R	46174689..46178422	612
CaNAC42	XP_004502931	Ca_04187	Ca_05813	LOC101512547	5	F	47316088..47320334	354
CaNAC43	XP_004502989	Ca_04233	Ca_05788	LOC101501929	5	F	47732864..47734545	289
CaNAC44	XP_004503093	Ca_13258	Ca_06554	LOC101490730	6	F	331465..334673	636
CaNAC45	XP_004503503	Ca_05913	Ca_07944	LOC101489972	6	R	3866751..3869959	457
CaNAC46	XP_004503781	Ca_05696	Ca_07346	LOC101491999	6	F	6014268..6015696	233
CaNAC47	XP_004503901	Ca_16946	Ca_13731	LOC101505565	6	R	6841586..6843381	289
CaNAC48	XP_004503931	Ca_09683	Ca_14480	NAC2	6	F	7003910..7005609	191
CaNAC49	XP_004504766	Ca_05227	Ca_07304	LOC101515261	6	R	14578007..14579436	193
CaNAC50	XP_004505006	Ca_19654	Ca_07121	LOC101488542	6	R	16431486..16433373	364
CaNAC51	XP_004505101	Ca_06348	Ca_13059	LOC101493442	6	F	17336382..17340638	322
CaNAC52	XP_004505411	Ca_16379	Ca_17424	LOC101509428	6	F	20517966..20519617	253
CaNAC53	XP_004505536	Ca_11273	Ca_08980	LOC101496883	6	R	21668479..21670509	292
CaNAC54	XP_004505672	Ca_11128	Ca_01846	LOC101514169	6	R	23284532..23286764	307
CaNAC55	XP_004506197	Ca_15160	Ca_15058	LOC101497878	6	F	31216484..31218781	272
CaNAC56	XP_004506361	Ca_15792	Ca_01735	LOC101505910	6	R	35067983..35072136	358
CaNAC57	XP_004508725	Ca_13160	Ca_08467	LOC101502392	7	R	8462560..8464833	430
CaNAC58	XP_004509014	Ca_12837	Ca_12494	LOC101514305	7	F	10845934..10847707	331
CaNAC59	XP_004509344	-	Ca_07793	LOC101488685	7	F	14616744..14620971	335
CaNAC60	XP_004510270	-	Ca_12057	LOC101498998	7	R	29199020..29200557	298
CaNAC61	XP_004511662	Ca_02365	Ca_03367	LOC101495397	8	F	2252404..2262431	337
CaNAC62	XP_004511779	Ca_02274	Ca_03253	LOC101502820	8	F	3061135..3063786	336
CaNAC63	XP_004512120	Ca_01981	Ca_12969	LOC101497688	8	F	5666242..5670641	366
CaNAC64	XP_004512922	Ca_13012	-	LOC101499757	8	R	14543096..14545912	324
CaNAC65	XP_004513071	Ca_15514	Ca_03822	LOC101496614	8	R	16034162..16040211	418
CaNAC66	XP_004515256	Ca_18034	Ca_14147	LOC101510787	Unplaced Scaffold	R	439613..444171	237
CaNAC67	XP_004514350	Ca_21186	-	LOC101489389	Unplaced Scaffold	F	502851..504830	329
CaNAC68	XP_004514350	Ca_22425	Ca_18255	LOC101489720	Unplaced Scaffold	F	287489..289383	428
CaNAC69	XP_004514929	Ca_22426	Ca_18255	LOC101490036	Unplaced Scaffold	F	303541..305320	427
CaNAC70	XP_004514930	Ca_26322	Ca_18511	LOC101491662	Unplaced Scaffold	F	119843..122115	407
CaNAC71	XP_004516088	Ca_27204	Ca_16921	LOC101501154	Unplaced Scaffold	F	6168..9913	610
